# Supplementary material for: Synthesis and photophysical, thermal and antimycobacterial properties of novel 6-amino-2-alkyl(aryl/heteroaryl)-4-(trifluoromethyl) quinolines
Source: Royal Society of Chemistry journal article supplement (doi:10.1039/c9nj01681c), 2019-01-01
Supplement: c9nj01681c1.pdf [file c9nj01681c1.pdf]

## Supporting Information

Synthesis, photophysical, thermal and antimycobacterial properties of novel 6-amino-2-alkyl(aryl/heteroaryl)-4-(trifluoromethyl) quinolines

Yuri G. Kappenberg,<sup>a</sup> Alex Ketzer,<sup>a</sup> Felipe S. Stefanello,<sup>a</sup> Paulo R. S. Salbego,<sup>a</sup> Thiago V. Acunha,<sup>b</sup> Bruno L. Abbadi,<sup>c</sup> Cristiano V. Bizarro,<sup>c</sup> Luiz A. Basso,<sup>c</sup> Pablo Machado,<sup>c</sup> Marcos A. P. Martins,<sup>a</sup> Nilo Zanatta,<sup>a</sup> Bernardo A. Iglesias<sup>b</sup> and Helio G. Bonacorso\*<sup>a</sup>

<sup>a</sup>Núcleo de Química de Heterociclos (NUQUIMHE), Departamento de Química, Universidade Federal de Santa Maria, 97105-900 Santa Maria, Brazil.

E-mail: helio.bonacorso@ufsm.br

<sup>b</sup>Laboratório de Bioinorgânica e Materiais Porfirínicos, Departamento de Química, Universidade Federal de Santa Maria, Santa Maria, RS, 97105-900, Brazil.

<sup>c</sup>Instituto Nacional de Ciência e Tecnologia em Tuberculose (INCT-TB), Centro de Pesquisas em Biologia Molecular e Funcional, Pontifícia Universidade Católica do Rio Grande do Sul, 90619-900 Porto Alegre, RS, Brazil.

|                                                                         |     |
|-------------------------------------------------------------------------|-----|
| 1. Synthesis Procedures .....                                           | S2  |
| 2. Crystallographic Data .....                                          | S4  |
| 3. UV-Vis Analyses .....                                                | S6  |
| 4. Steady-state emission fluorescence analyses.....                     | S8  |
| 5. TD-DFT Calculations .....                                            | S10 |
| 6. Thermal Analyses .....                                               | S16 |
| 7. <sup>1</sup> H, <sup>13</sup> C and <sup>19</sup> F NMR Spectra..... | S18 |
| 8. HRMS Spectra.....                                                    | S36 |

## 1. Synthesis Procedures

**Table S1.** Optimization of the reaction conditions for compounds **3**.<sup>a</sup>

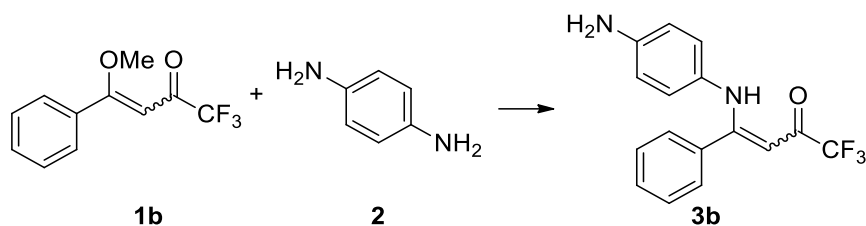

| Entry <sup>a</sup> | Solvent                         | Temperature (°C) | Yield <sup>b</sup> (%) |
|--------------------|---------------------------------|------------------|------------------------|
| 1                  | MeOH                            | 0                | 87                     |
| 2                  | MeOH                            | 25               | 62                     |
| 3                  | EtOH                            | 0                | 82                     |
| 4                  | CHCl <sub>3</sub>               | 0                | 73                     |
| 5                  | CH <sub>2</sub> Cl <sub>2</sub> | 0                | 71                     |
| 6                  | CH <sub>3</sub> CN              | 0                | 71                     |

<sup>a</sup> Reaction conditions: **1b** (1.0 mmol) and **2** (1.0 mmol), solvent (10 mL), 2 h.

<sup>b</sup> Isolated yield.

### Synthesis of (Z)-4-((4-aminophenyl)amino)-1,1,1-trifluorobut-3-en-2-ones (**3a-f**)

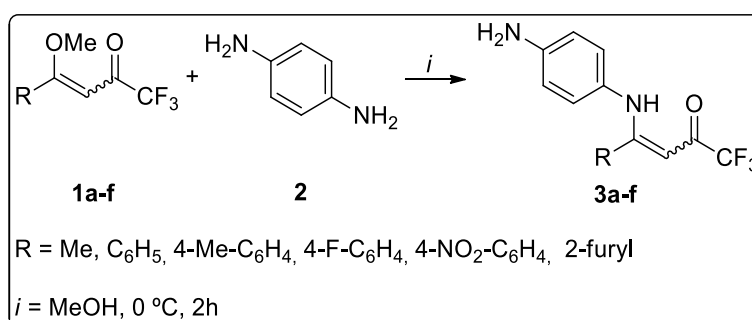

To a magnetically stirred solution of 1,4-phenylenediamine (**2**) (1 mmol, 0.108 g) in methanol (10 mL), a solution of 4-methoxy-1,1,1-trifluorobut-3-en-2-ones (**3a-f**) (1 mmol) in methanol (20mL) was added dropwise at 0 °C over a period of 2 h. After the end of the reaction, traces of the solvent was evaporated under reduced pressure and the products **3a-f** recrystallized from ethanol and water. The solution was then cooled at -10 °C, and yellow, red or brown solids were obtained. The solids were filtered under reduced pressure, washed with cold water, and dried under reduced pressure.

Synthesis of 2-alkyl(aryl/heteroaryl)-6-amino-4-(trifluoromethyl)quinolines

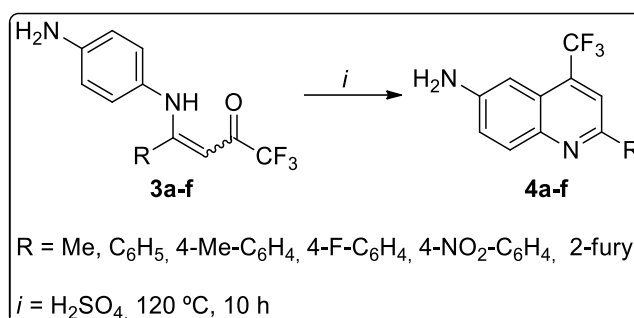

To a flask containing 1 mmol of (*Z*)-4-((4-aminophenyl)amino)-1,1,1-trifluorobut-3-en-2-ones (**3a-f**), 5 mL of the concentrated sulfuric acid was added. The reaction mixture was heated at 120 °C under magnetic stirring for 10 h. After cooling the system to room temperature, the reaction mixture was treated with distilled water (5 mL) and was neutralized with a solution of NaHCO<sub>3</sub> saturated. The compounds **4a-f** were extracted with ethyl acetate (3x 20 mL) and the organic phase was dried with Na<sub>2</sub>SO<sub>4</sub>, filtered, and then the solvent was removed under reduced pressure. The products **4a-f** were purified by column chromatography on silica gel using hexane as eluent.

## 2. Crystallographic Data

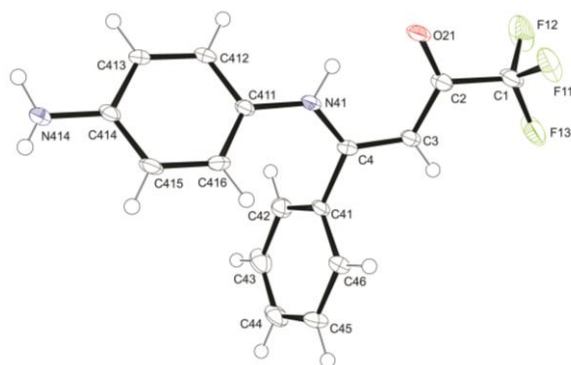

**Figure S1.** ORTEP of enamino ketone (**3b**) (CCDC 1895628). Displacement ellipsoids are drawn at the 50% probability level.

**Table S2.** Crystal data and structure refinement for compounds **3b** and **4d**.

| Compound                                                         | <b>3b</b>                                                       | <b>4d</b>                                                     |
|------------------------------------------------------------------|-----------------------------------------------------------------|---------------------------------------------------------------|
| CCDC number                                                      | 1895628                                                         | 1895629                                                       |
| Empirical formula                                                | C <sub>16</sub> H <sub>13</sub> F <sub>3</sub> N <sub>2</sub> O | C <sub>16</sub> H <sub>10</sub> F <sub>4</sub> N <sub>2</sub> |
| Molecular weight                                                 | 306.28                                                          | 306.26                                                        |
| Temperature (K)                                                  | 100(2)                                                          | 296(2)                                                        |
| Wavelength (Å)                                                   | 0.71073                                                         | 1.54178                                                       |
| Crystal system                                                   | Monoclinic                                                      | Monoclinic                                                    |
| Space group                                                      | <i>P</i> 2 <sub>1</sub> / <i>c</i>                              | <i>P</i> 2 <sub>1</sub> / <i>c</i>                            |
| Cell parameters                                                  |                                                                 |                                                               |
| a (Å)                                                            | 12.0703(9)                                                      | 14.122(3)                                                     |
| b (Å)                                                            | 5.8282(4)                                                       | 4.6032(10)                                                    |
| c (Å)                                                            | 20.5755(14)                                                     | 21.574(5)                                                     |
| α (°)                                                            | 90                                                              | 90                                                            |
| β (°)                                                            | 100.792(2)                                                      | 106.541(11)                                                   |
| γ (°)                                                            | 90                                                              | 90                                                            |
| Volume (Å <sup>3</sup> )                                         | 1421.85(17)                                                     | 1344.4(5)                                                     |
| Z                                                                | 4                                                               | 4                                                             |
| Calculated density (Mg/m <sup>3</sup> )                          | 1.431                                                           | 1.513                                                         |
| Abs. coef. (mm <sup>-1</sup> )                                   | 0.118                                                           | 1.126                                                         |
| F (000)                                                          | 632                                                             | 624                                                           |
| Crystal size (mm)                                                | 0.397 x 0.091 x 0.055                                           | 0.318 x 0.248 x 0.094                                         |
| θ range for data collection (°)                                  | 2.391 to 27.152                                                 | 3.264 to 68.481                                               |
| h, k, l range                                                    | -15<=h<=15, -7<=k<=7, -26<=l<=26                                | -16<=h<=16, -5<=k<=4, -26<=l<=25                              |
| Reflections collected / unique                                   | 38690 / 3156 [R(int) = 0.0919]                                  | 8521 / 2353 [R(int) = 0.0199]                                 |
| Completeness to theta (%)                                        | 99.8                                                            | 91.4                                                          |
| Absorption correction                                            | Multi-scan                                                      | Multi-scan                                                    |
| Max. and min. transmission                                       | 0.7455 and 0.5601                                               | 0.7531 and 0.6708                                             |
| Refinement method                                                | Full-matrix least-squares on F <sup>2</sup>                     | Full-matrix least-squares on F <sup>2</sup>                   |
| Data / restraints / parameters                                   | 3156 / 3 / 204                                                  | 2353 / 2 / 200                                                |
| Goodness-of-fit on F <sup>2</sup>                                | 1.056                                                           | 1.019                                                         |
| Final R indices                                                  | R1 = 0.0585, wR2 = 0.1377                                       | R1 = 0.0359, wR2 = 0.0931                                     |
| R all data                                                       | R1 = 0.0830, wR2 = 0.1505                                       | R1 = 0.0485, wR2 = 0.1026                                     |
| Extinction coefficient                                           | none                                                            | none                                                          |
| Δ ρ <sub>max.</sub> and Δ ρ <sub>min.</sub> (e Å <sup>-3</sup> ) | 0.572 and -0.457                                                | 0.134 and -0.130                                              |

### 3. UV-Vis Analyses

UV-Vis absorption spectra were recorded using Shimadzu UV-2600 spectrophotometer (data interval, 1.0 nm) using  $\text{CHCl}_3$ , DMSO or MeOH as solvent, using concentration of  $2.0 \times 10^{-4}$  M for each compound. Fluorescence spectra of samples in all solutions were measured with a Varian Cary50 fluorescence spectrophotometer (emission; slit 1.0 nm) and were corrected according to the manufacturer's instructions. The lowest energy electronic transition of each derivative to be excited (emission spectrum) was chosen. Fluorescence quantum yields ( $\Phi_f$ ) of the related compounds in solutions were determined by comparing the corrected fluorescence spectra with that of 9,10-diphenylanthracene (DPA) in chloroform ( $\Phi_f = 0.65$ ,  $\lambda_{\text{ex}} = 366$  nm) as the standard as the fluorescence yield.

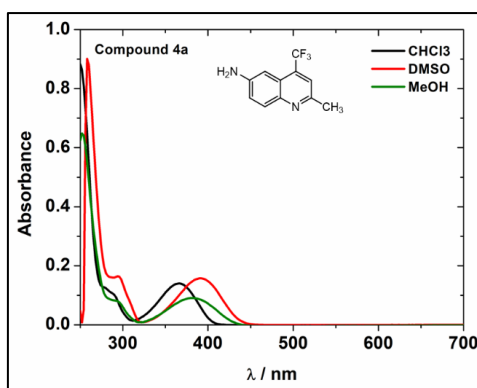

**Figure S2.** UV-vis spectra of compound **4a** in  $\text{CHCl}_3$  (black line), DMSO (red line) and MeOH (green line) solution, respectively.

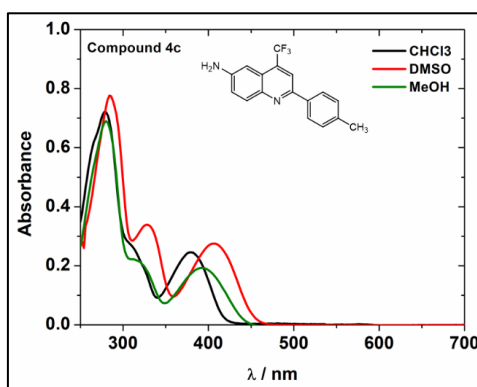

**Figure S3.** UV-vis spectra of compound **4c** in  $\text{CHCl}_3$  (black line), DMSO (red line) and MeOH (green line) solution, respectively.

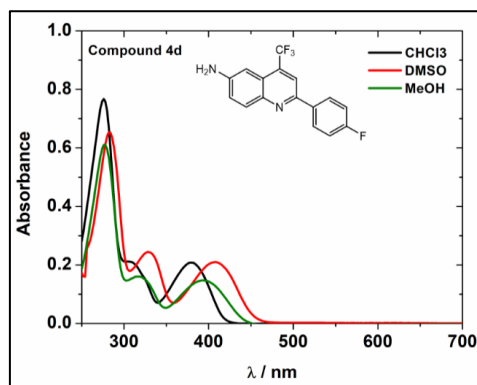

**Figure S4.** UV-vis spectra of compound **4d** in CHCl<sub>3</sub> (black line), DMSO (red line) and MeOH (green line) solution, respectively.

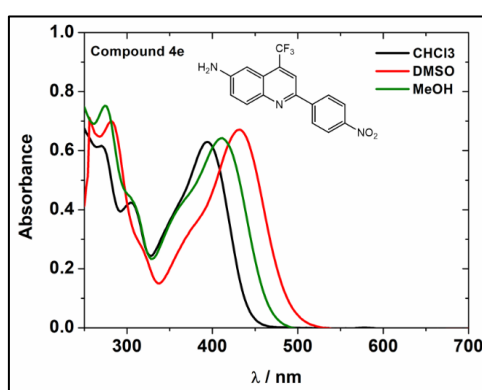

**Figure S5.** UV-vis spectra of compound **4e** in CHCl<sub>3</sub> (black line), DMSO (red line) and MeOH (green line) solution, respectively.

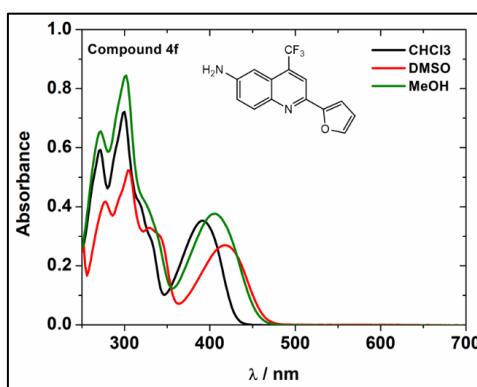

**Figure S6.** UV-Vis spectra of compound **4f** in CHCl<sub>3</sub> (black line), DMSO (red line) and MeOH (green line) solution, respectively.

#### 4. Steady-state emission fluorescence analyses

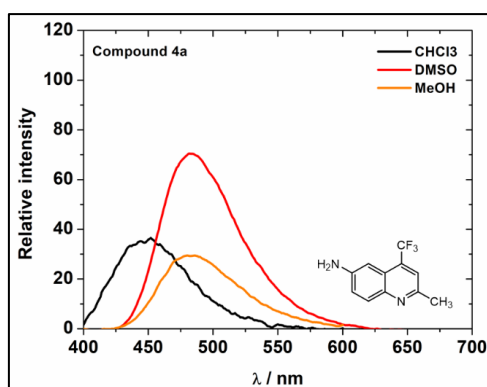

**Figure S7.** Steady-state emission fluorescence spectra of compound **4a** in CHCl<sub>3</sub> (black line;  $\lambda_{\text{exc}} = 366$  nm), DMSO (red line;  $\lambda_{\text{exc}} = 391$  nm) and MeOH (orange line;  $\lambda_{\text{exc}} = 382$  nm) solution, respectively.

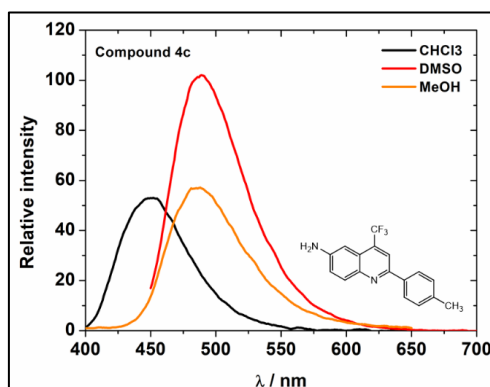

**Figure S8.** Steady-state emission fluorescence spectra of compound **4c** in CHCl<sub>3</sub> (black line;  $\lambda_{\text{exc}} = 380$  nm), DMSO (red line;  $\lambda_{\text{exc}} = 407$  nm) and MeOH (orange line;  $\lambda_{\text{exc}} = 394$  nm) solution, respectively.

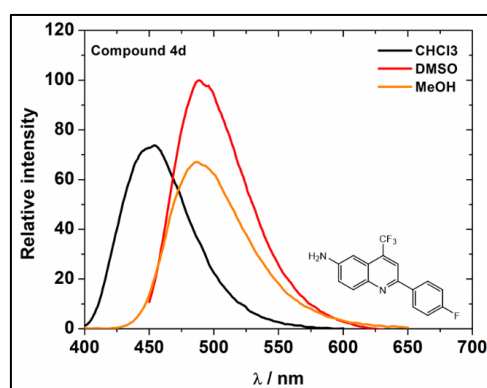

**Figure S9.** Steady-state emission fluorescence spectra of compound **4d** in CHCl<sub>3</sub> (black line;  $\lambda_{\text{exc}} = 380$  nm), DMSO (red line;  $\lambda_{\text{exc}} = 408$  nm) and MeOH (orange line;  $\lambda_{\text{exc}} = 394$  nm) solution, respectively.



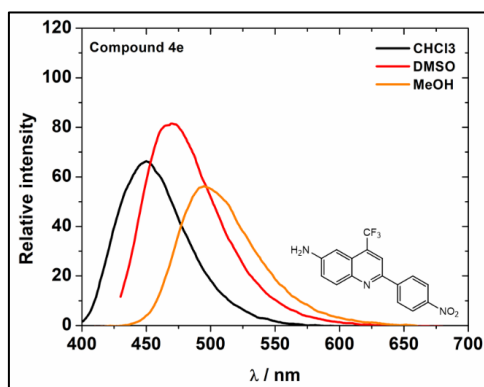

**Figure S10.** Steady-state emission fluorescence spectra of compound **4e** in CHCl<sub>3</sub> (black line;  $\lambda_{\text{exc}} = 349$  nm), DMSO (red line;  $\lambda_{\text{exc}} = 431$  nm) and MeOH (orange line;  $\lambda_{\text{exc}} = 411$  nm) solution, respectively.

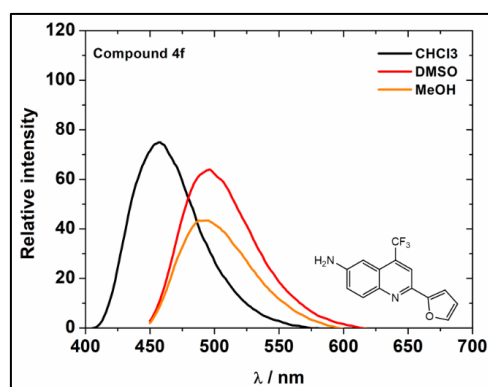

**Figure S11.** Steady-state emission fluorescence spectra of compound **4f** in CHCl<sub>3</sub> (black line;  $\lambda_{\text{exc}} = 392$  nm), DMSO (red line;  $\lambda_{\text{exc}} = 418$  nm) and MeOH (orange line;  $\lambda_{\text{exc}} = 405$  nm) solution, respectively.

## 5. TD-DFT Calculations

**Table S3.** Excitation energy ( $E$ ), wavelength of maximum absorbance ( $\lambda_{\max}$ ), and oscillator strengths ( $f$ ) for HOMO-LUMO orbitals in  $\text{CHCl}_3$ , DMSO and MeOH for compound **4a**. Calculated at the TD-DFT (SCRF(PCM))-B3LYP/cc-pVTZ level.

| Solvent         | Electronic Transitions | Energy (eV) | $\lambda_{\max}$ (nm) | Main Orbital Transition          | $f$    |
|-----------------|------------------------|-------------|-----------------------|----------------------------------|--------|
| $\text{CHCl}_3$ | $S_0 \rightarrow S_1$  | 3.429       | 361.54                | HOMO $\rightarrow$ LUMO (0.69)   | 0.1284 |
|                 | $S_0 \rightarrow S_2$  | 4.254       | 291.49                | HOMO-2 $\rightarrow$ LUMO (0.70) | 0.0012 |
|                 | $S_0 \rightarrow S_3$  | 4.336       | 285.92                | HOMO-1 $\rightarrow$ LUMO (0.53) | 0.0007 |
| DMSO            | $S_0 \rightarrow S_1$  | 3.404       | 364.21                | HOMO $\rightarrow$ LUMO (0.69)   | 0.1273 |
|                 | $S_0 \rightarrow S_2$  | 4.290       | 289.02                | HOMO-2 $\rightarrow$ LUMO (0.70) | 0.0012 |
|                 | $S_0 \rightarrow S_3$  | 4.327       | 286.54                | HOMO-1 $\rightarrow$ LUMO (0.52) | 0.0009 |
| MeOH            | $S_0 \rightarrow S_1$  | 3.411       | 363.46                | HOMO $\rightarrow$ LUMO (0.69)   | 0.1207 |
|                 | $S_0 \rightarrow S_2$  | 4.288       | 289.12                | HOMO-2 $\rightarrow$ LUMO (0.70) | 0.0012 |
|                 | $S_0 \rightarrow S_3$  | 4.329       | 286.41                | HOMO-1 $\rightarrow$ LUMO (0.52) | 0.0009 |

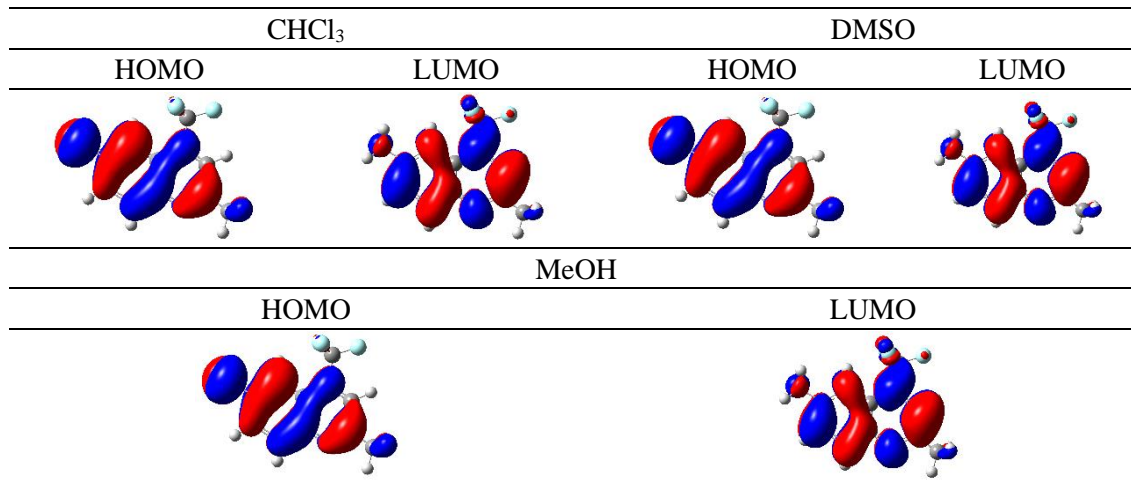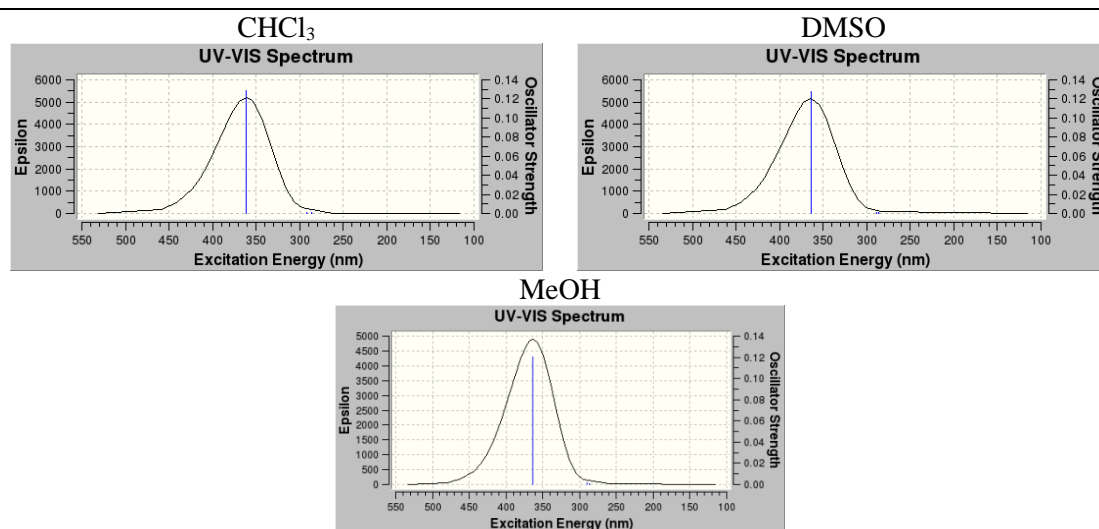

Figure S12. Calculated UV-Vis spectra for compound **4a** in  $\text{CHCl}_3$ , DMSO and MeOH.

**Table S4.** Excitation energy (E), wavelength of maximum absorbance ( $\lambda_{\max}$ ), and oscillator strengths ( $f$ ) for HOMO-LUMO orbitals in  $\text{CHCl}_3$ , DMSO and MeOH for compound **4b**. Calculated at the TD-DFT (SCRf(PCM))-B3LYP/cc-pVTZ level.

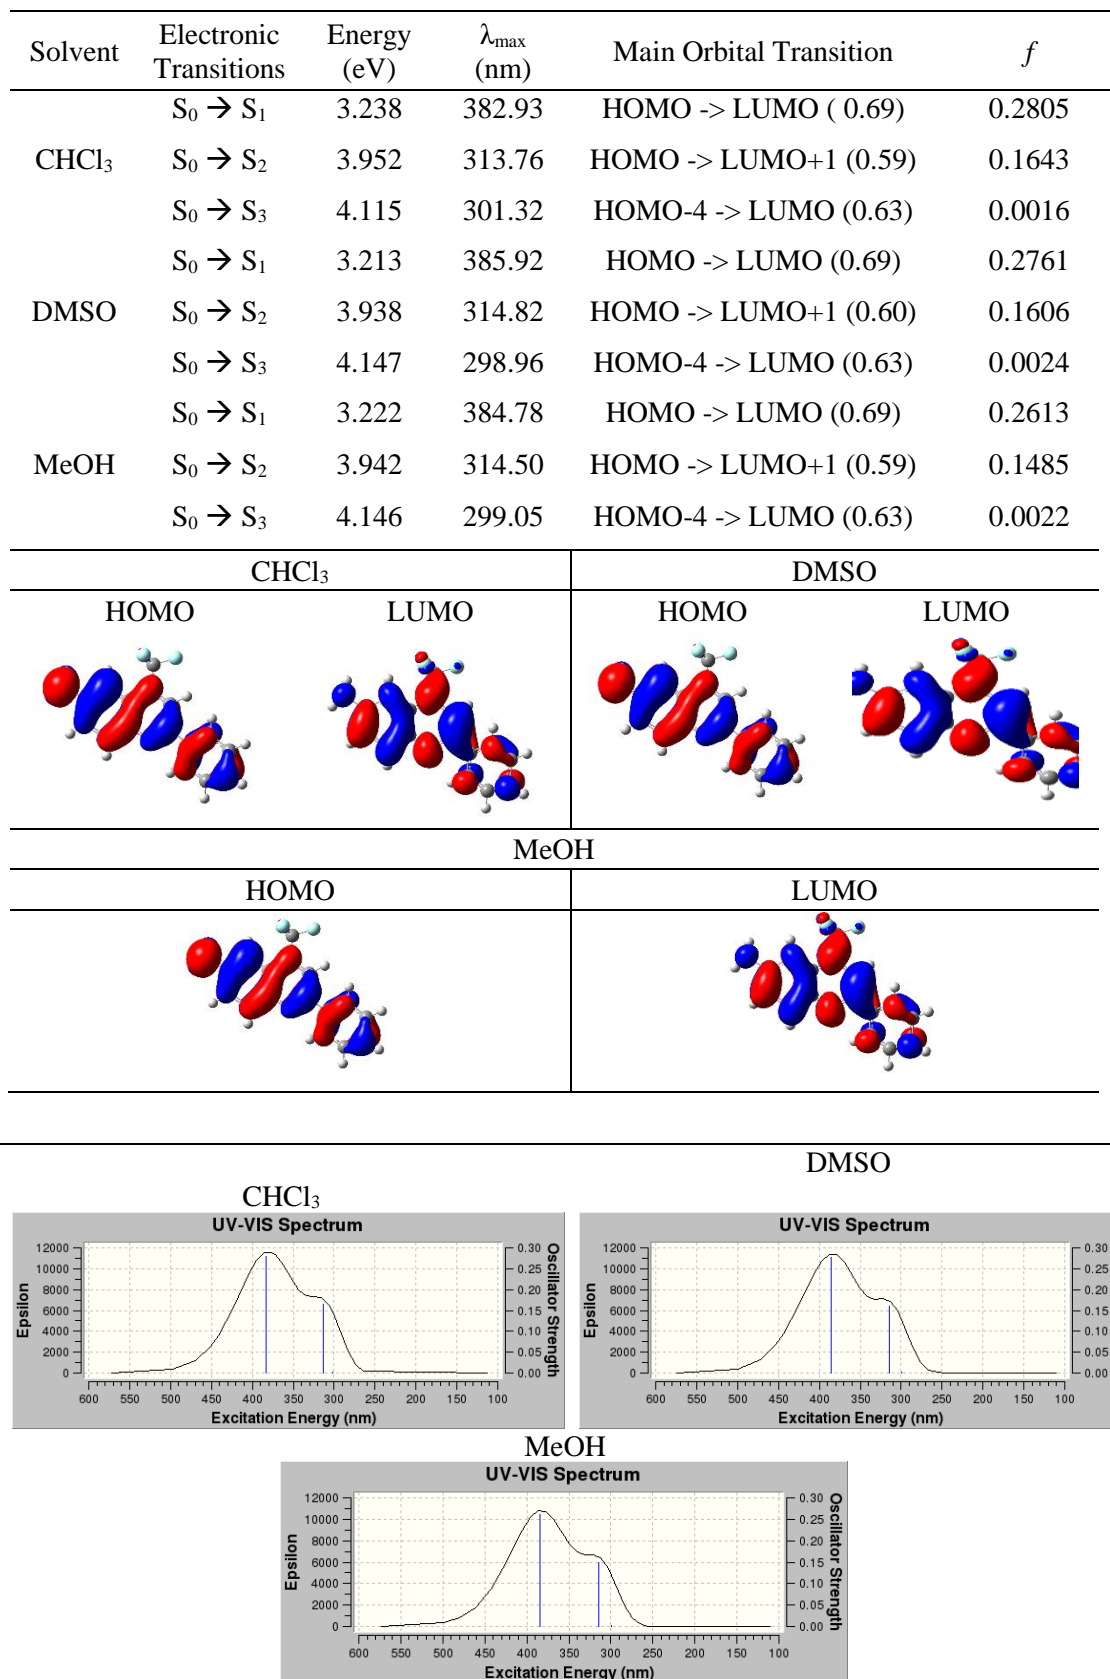

**Figure S13.** Calculated UV-Vis spectra for compound **4b** in  $\text{CHCl}_3$ , DMSO and MeOH.

**Table S5.** Excitation energy (E), wavelength of maximum absorbance ( $\lambda_{\max}$ ), and oscillator strengths ( $f$ ) for HOMO-LUMO orbitals in CHCl<sub>3</sub>, DMSO and MeOH for compound **4c**. Calculated at the TD-DFT (SCRFP(CM))-B3LYP/cc-pVTZ level.

| Solvent           | Electronic Transitions          | Energy (eV) | $\lambda_{\max}$ (nm) | Main Orbital Transition | $f$    |
|-------------------|---------------------------------|-------------|-----------------------|-------------------------|--------|
| CHCl <sub>3</sub> | S <sub>0</sub> → S <sub>1</sub> | 3.215       | 385.65                | HOMO → LUMO ( 0.69)     | 0.3028 |
|                   | S <sub>0</sub> → S <sub>2</sub> | 3.941       | 314.62                | HOMO → LUMO+1 (0.59)    | 0.1902 |
|                   | S <sub>0</sub> → S <sub>3</sub> | 4.114       | 301.35                | HOMO-4 → LUMO (0.63)    | 0.0071 |
| DMSO              | S <sub>0</sub> → S <sub>1</sub> | 3.191       | 388.53                | HOMO → LUMO ( 0.69)     | 0.2977 |
|                   | S <sub>0</sub> → S <sub>2</sub> | 3.930       | 315.48                | HOMO → LUMO+1 (0.59)    | 0.1819 |
|                   | S <sub>0</sub> → S <sub>3</sub> | 4.145       | 299.12                | HOMO-4 → LUMO (0.61)    | 0.0270 |
| MeOH              | S <sub>0</sub> → S <sub>1</sub> | 3.201       | 387.39                | HOMO → LUMO ( 0.69)     | 0.2822 |
|                   | S <sub>0</sub> → S <sub>2</sub> | 3.934       | 315.17                | HOMO → LUMO+1 (0.58)    | 0.1674 |
|                   | S <sub>0</sub> → S <sub>3</sub> | 4.144       | 299.18                | HOMO-4 → LUMO (0.62)    | 0.0200 |

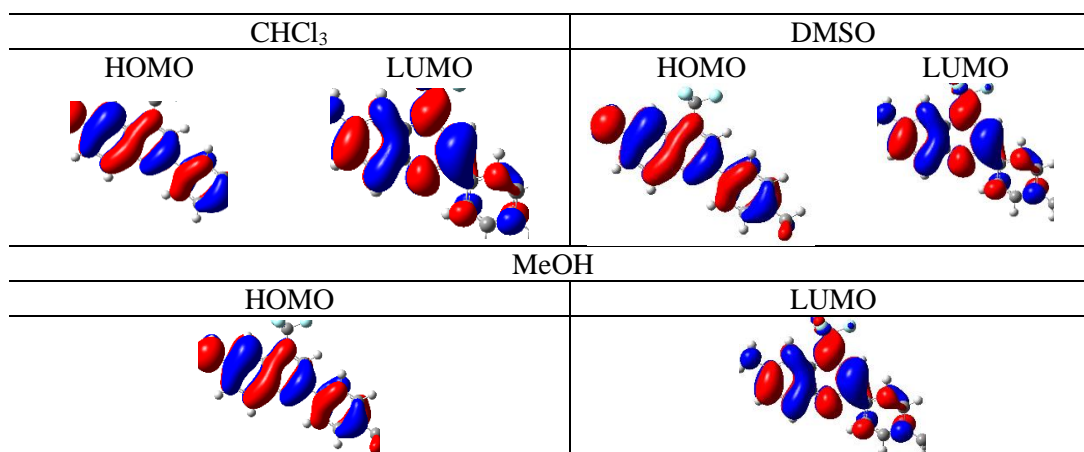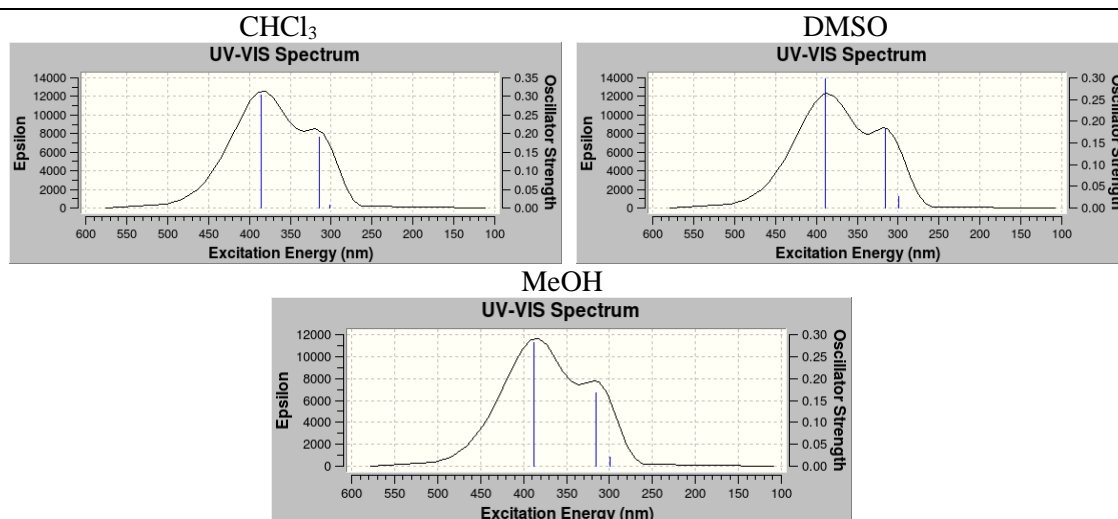

**Figure S14.** Calculated UV-Vis spectra for compound **4c** in CHCl<sub>3</sub>, DMSO and MeOH.

**Table S6.** Excitation energy (E), wavelength of maximum absorbance ( $\lambda_{\max}$ ), and oscillator strengths ( $f$ ) for HOMO-LUMO orbitals in  $\text{CHCl}_3$ , DMSO and MeOH for compound **4d**. Calculated at the TD-DFT (SCRFP(PCM))-B3LYP/cc-pVTZ level.

| Solvent         | Electronic Transitions | Energy (eV) | $\lambda_{\max}$ (nm) | Main Orbital Transition          | $f$    |
|-----------------|------------------------|-------------|-----------------------|----------------------------------|--------|
| $\text{CHCl}_3$ | $S_0 \rightarrow S_1$  | 3.22        | 385.23                | HOMO $\rightarrow$ LUMO (0.69)   | 0.2717 |
|                 | $S_0 \rightarrow S_2$  | 3.95        | 313.84                | HOMO $\rightarrow$ LUMO+1 (0.59) | 0.1608 |
|                 | $S_0 \rightarrow S_3$  | 4.14        | 299.67                | HOMO-3 $\rightarrow$ LUMO (0.52) | 0.0035 |
| DMSO            | $S_0 \rightarrow S_1$  | 3.198       | 387.70                | HOMO $\rightarrow$ LUMO (0.69)   | 0.2682 |
|                 | $S_0 \rightarrow S_2$  | 3.941       | 314.62                | HOMO $\rightarrow$ LUMO+1 (0.59) | 0.1554 |
|                 | $S_0 \rightarrow S_3$  | 4.167       | 297.54                | HOMO-3 $\rightarrow$ LUMO (0.48) | 0.0070 |
| MeOH            | $S_0 \rightarrow S_1$  | 3.207       | 386.61                | HOMO $\rightarrow$ LUMO (0.69)   | 0.2540 |
|                 | $S_0 \rightarrow S_2$  | 3.944       | 314.34                | HOMO $\rightarrow$ LUMO+1 (0.58) | 0.1436 |
|                 | $S_0 \rightarrow S_3$  | 4.166       | 297.61                | HOMO-3 $\rightarrow$ LUMO (0.49) | 0.0058 |

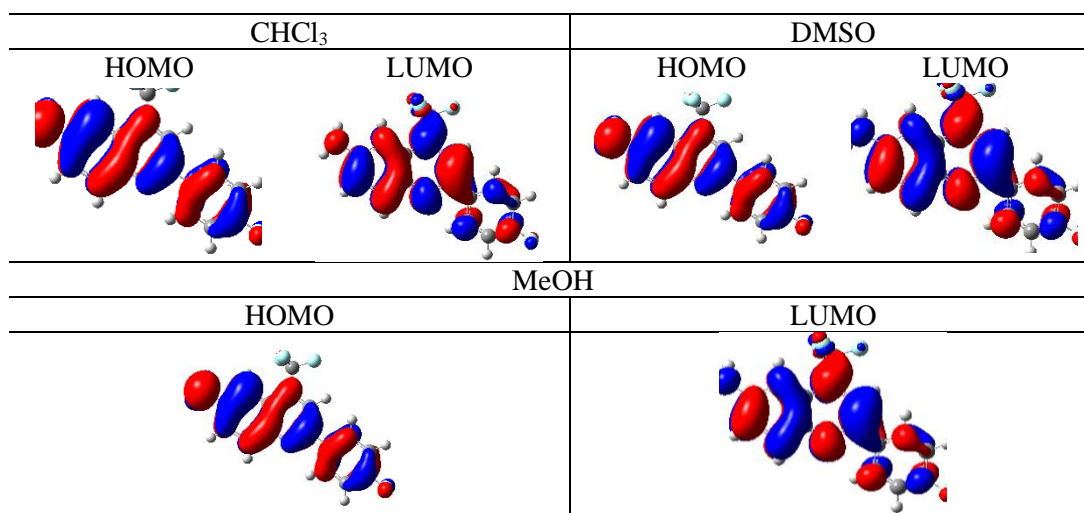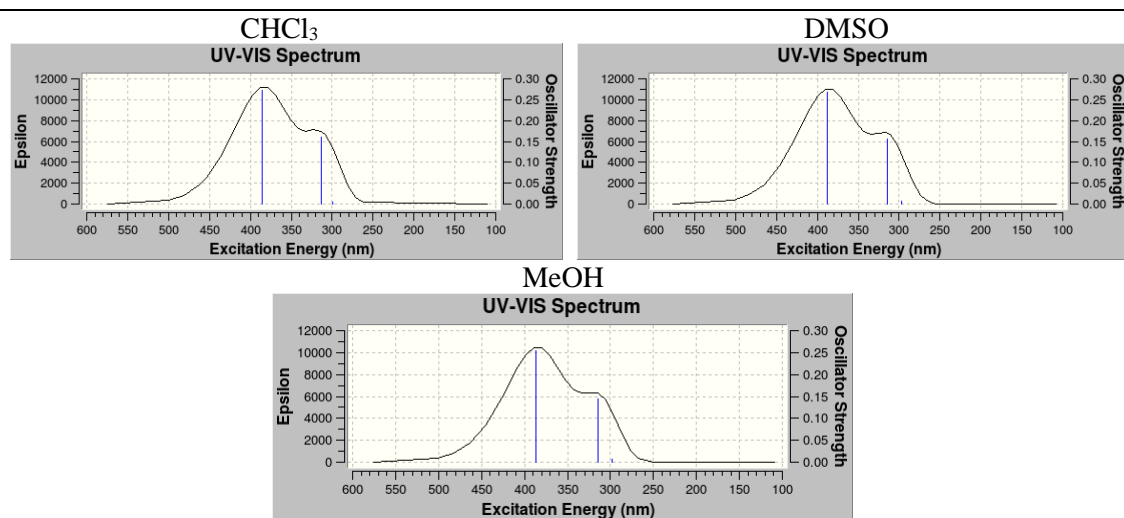

**Figure S15.** Calculated UV-Vis spectra for compound **4d** in  $\text{CHCl}_3$ , DMSO and MeOH.

**Table S7.** Excitation energy (E), wavelength of maximum absorbance ( $\lambda_{\max}$ ), and oscillator strengths ( $f$ ) for HOMO-LUMO orbitals in CHCl<sub>3</sub>, DMSO and MeOH for compound **4e**. Calculated at the TD-DFT (SCRFP(M)))-B3LYP/cc-pVTZ level.

| Solvent           | Electronic Transitions          | Energy (eV) | $\lambda_{\max}$ (nm) | Main Orbital Transition | $f$    |
|-------------------|---------------------------------|-------------|-----------------------|-------------------------|--------|
| CHCl <sub>3</sub> | S <sub>0</sub> → S <sub>1</sub> | 2.746       | 451.57                | HOMO → LUMO ( 0.70)     | 0.5278 |
|                   | S <sub>0</sub> → S <sub>2</sub> | 3.351       | 370.03                | HOMO → LUMO+1 (0.69)    | 0.0640 |
|                   | S <sub>0</sub> → S <sub>3</sub> | 3.782       | 327.83                | HOMO-1 → LUMO (0.66)    | 0.1102 |
| DMSO              | S <sub>0</sub> → S <sub>1</sub> | 2.647       | 468.34                | HOMO → LUMO ( 0.70)     | 0.5059 |
|                   | S <sub>0</sub> → S <sub>2</sub> | 3.313       | 374.19                | HOMO → LUMO+1 (0.69)    | 0.0746 |
|                   | S <sub>0</sub> → S <sub>3</sub> | 3.708       | 334.38                | HOMO-1 → LUMO (0.68)    | 0.1024 |
| MeOH              | S <sub>0</sub> → S <sub>1</sub> | 2.662       | 465.74                | HOMO → LUMO ( 0.70)     | 0.4867 |
|                   | S <sub>0</sub> → S <sub>2</sub> | 3.319       | 373.51                | HOMO → LUMO+1 (0.69)    | 0.0712 |
|                   | S <sub>0</sub> → S <sub>3</sub> | 3.714       | 333.82                | HOMO-1 → LUMO (0.68)    | 0.0982 |

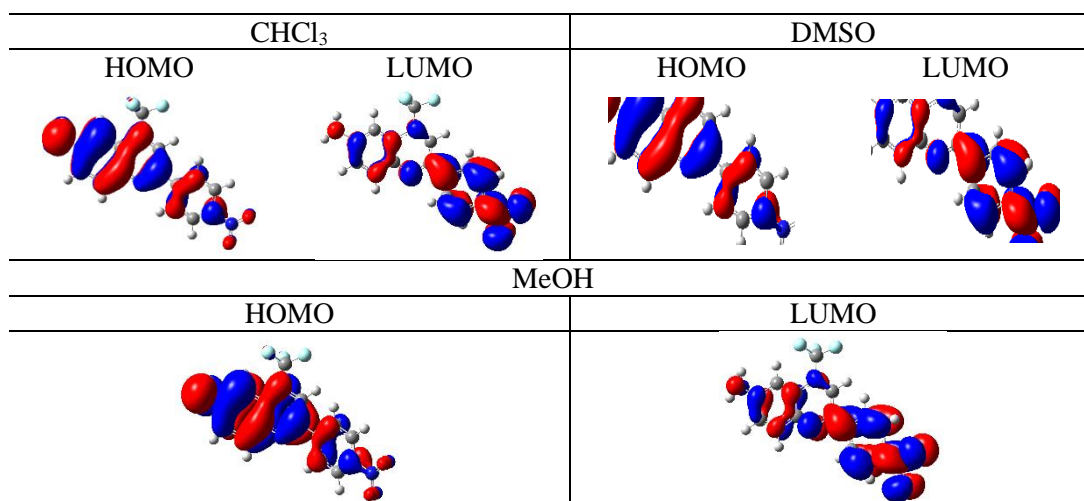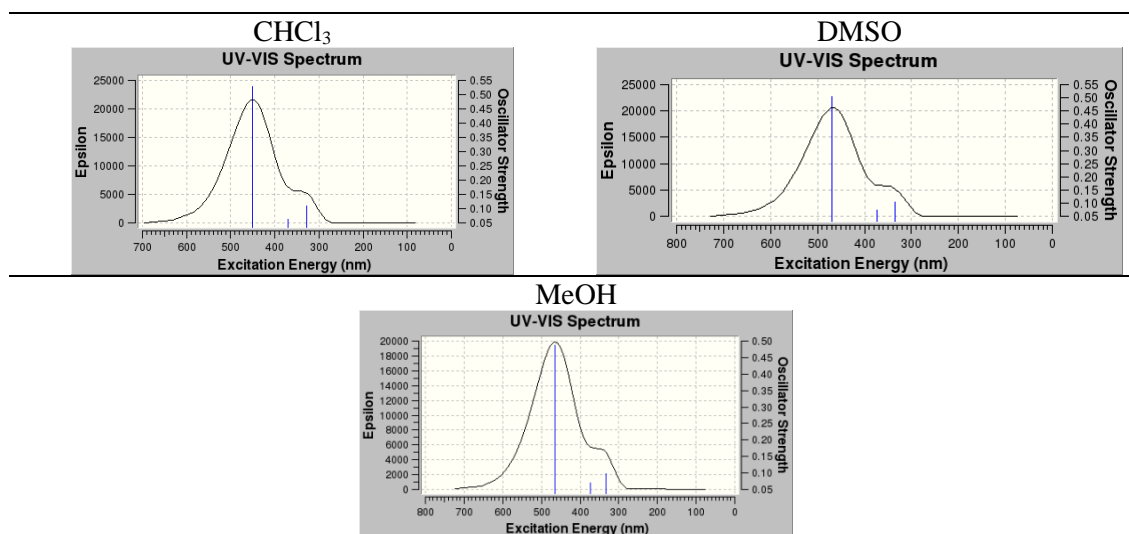

**Figure S16.** Calculated UV-Vis spectra for compound **4e** in CHCl<sub>3</sub>, DMSO and MeOH.

**Table S8.** Excitation energy (E), wavelength of maximum absorbance ( $\lambda_{\max}$ ), and oscillator strengths ( $f$ ) for HOMO-LUMO orbitals in CHCl<sub>3</sub>, DMSO and MeOH for compound **4f**. Calculated at the TD-DFT (SCRFP(CM))-B3LYP/cc-pVTZ level.

| Solvent           | Electronic Transitions          | Energy (eV) | $\lambda_{\max}$ (nm) | Main Orbital Transition | $f$    |
|-------------------|---------------------------------|-------------|-----------------------|-------------------------|--------|
| CHCl <sub>3</sub> | S <sub>0</sub> → S <sub>1</sub> | 3.138       | 395.08                | HOMO → LUMO ( 0.69)     | 0.3412 |
|                   | S <sub>0</sub> → S <sub>2</sub> | 3.842       | 322.67                | HOMO → LUMO+1 (0.58)    | 0.2074 |
|                   | S <sub>0</sub> → S <sub>3</sub> | 4.118       | 301.05                | HOMO-1 → LUMO (0.61)    | 0.5563 |
| DMSO              | S <sub>0</sub> → S <sub>1</sub> | 3.115       | 398.08                | HOMO → LUMO ( 0.69)     | 0.3390 |
|                   | S <sub>0</sub> → S <sub>2</sub> | 3.828       | 323.93                | HOMO → LUMO+1 (0.58)    | 0.1906 |
|                   | S <sub>0</sub> → S <sub>3</sub> | 4.106       | 301.95                | HOMO-1 → LUMO (0.61)    | 0.5685 |
| MeOH              | S <sub>0</sub> → S <sub>1</sub> | 3.126       | 396.65                | HOMO → LUMO ( 0.69)     | 0.3195 |
|                   | S <sub>0</sub> → S <sub>2</sub> | 3.832       | 323.52                | HOMO → LUMO+1 (0.57)    | 0.1748 |
|                   | S <sub>0</sub> → S <sub>3</sub> | 4.119       | 301.02                | HOMO-1 → LUMO (0.60)    | 0.5600 |

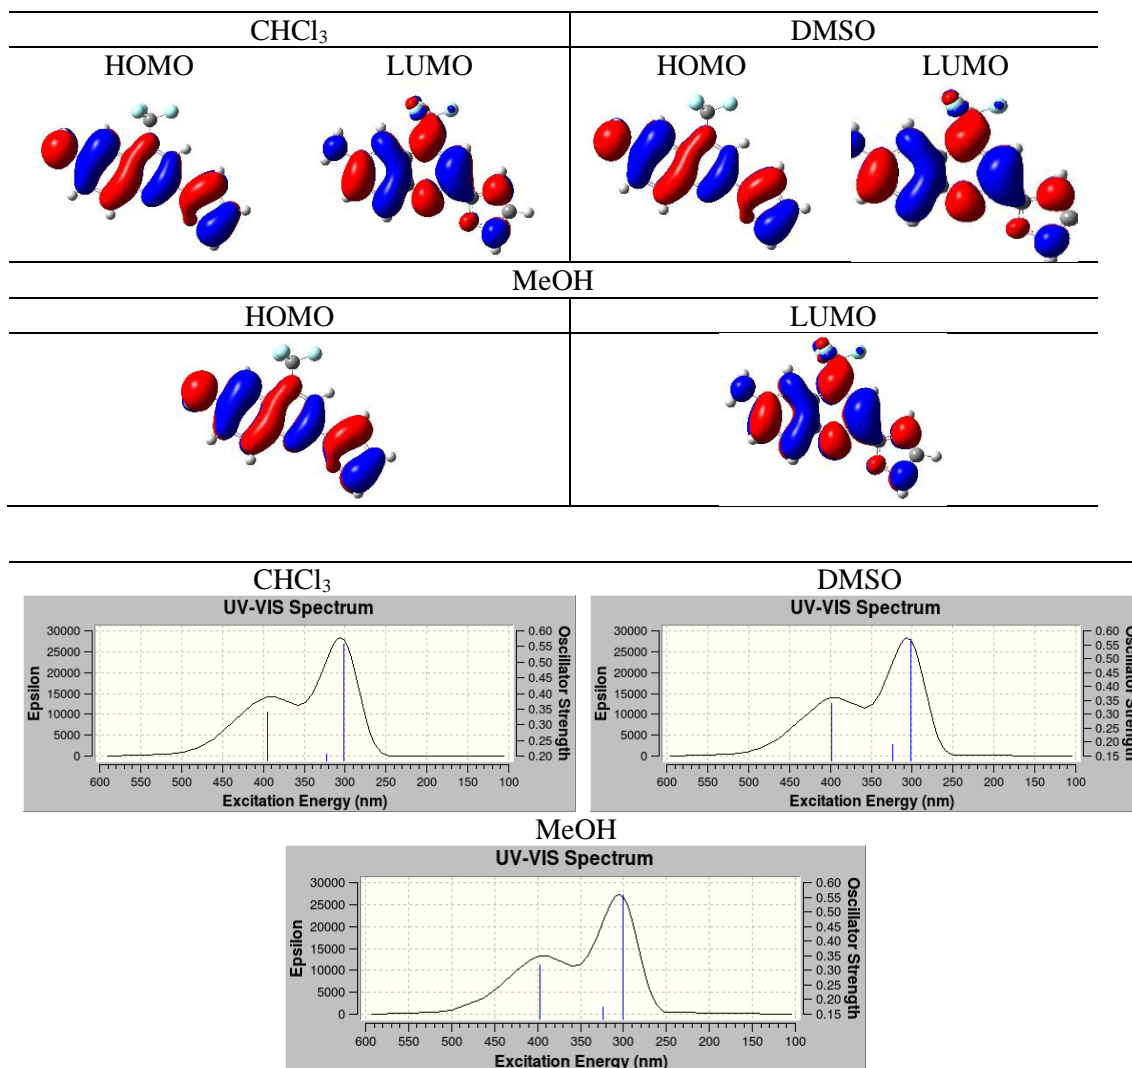

**Figure S17.** Calculated UV-Vis spectra for compound **4f** in CHCl<sub>3</sub>, DMSO and MeOH.

## 6. Thermal Analyses

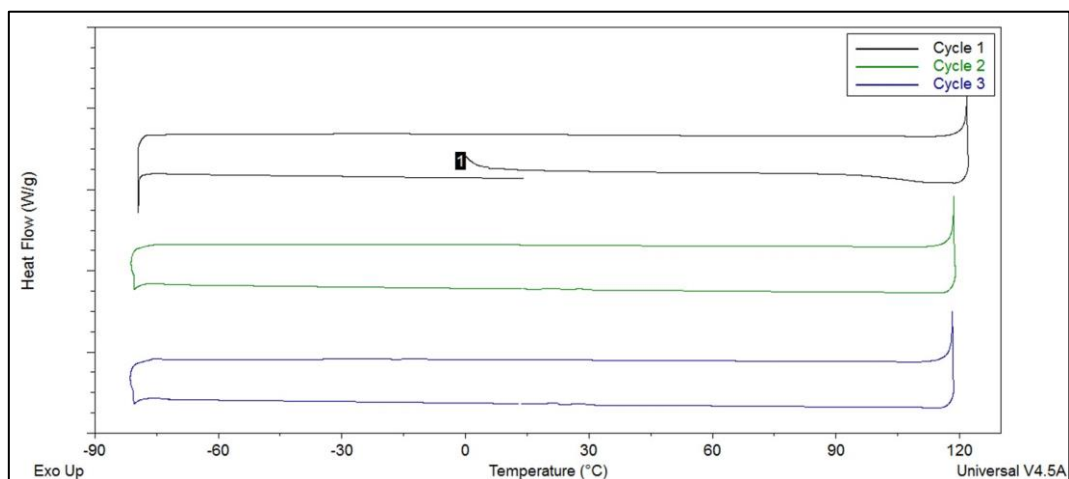

**Figure S18.** DSC curves for compound **4a** showing the three heating-cooling cycles.

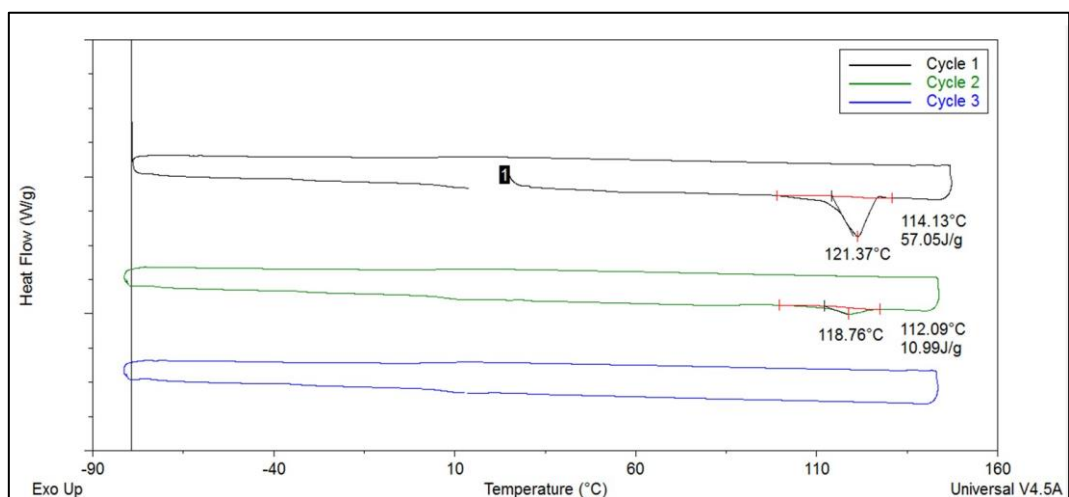

**Figure S19.** DSC curves for compound **4b** showing the three heating-cooling cycles.

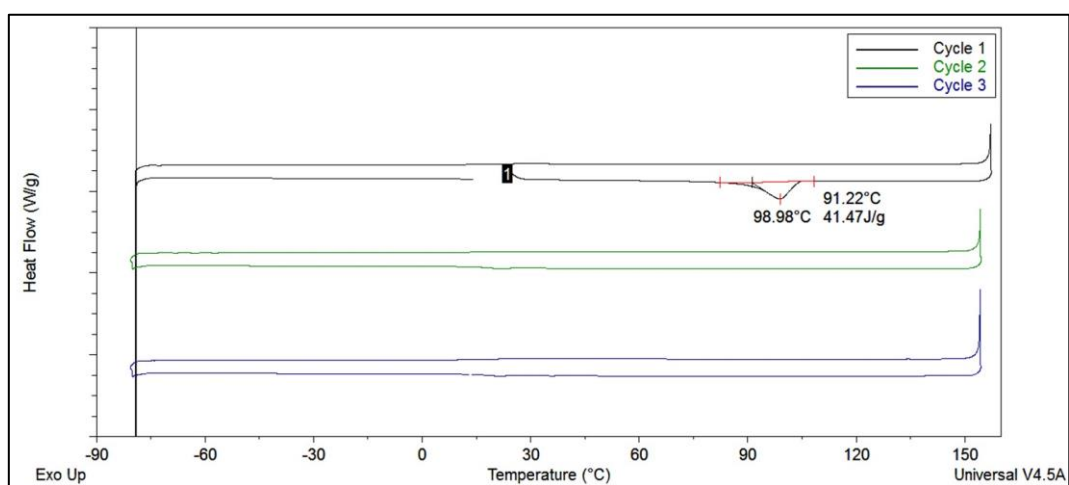

**Figure S20.** DSC curves for compound **4c** showing the three heating-cooling cycles.



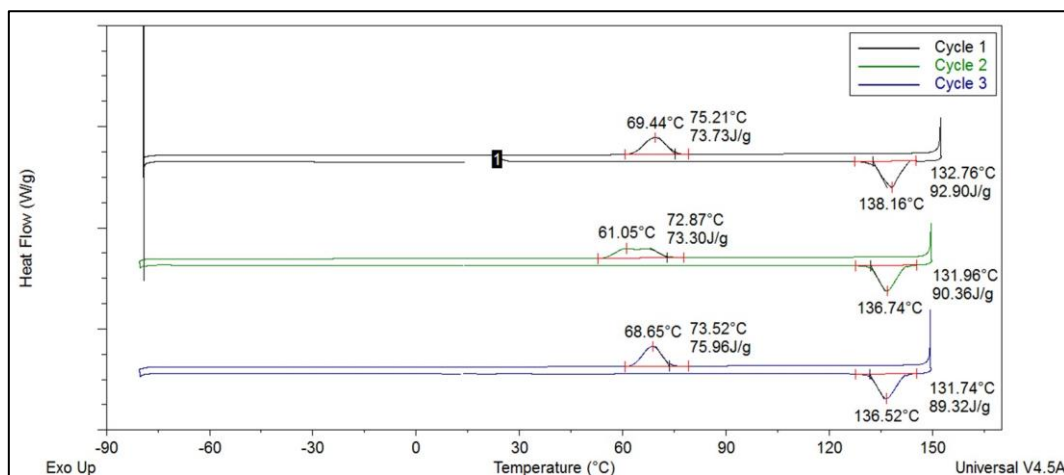

**Figure S21.** DSC curves for compound **4d** showing the three heating-cooling cycles.

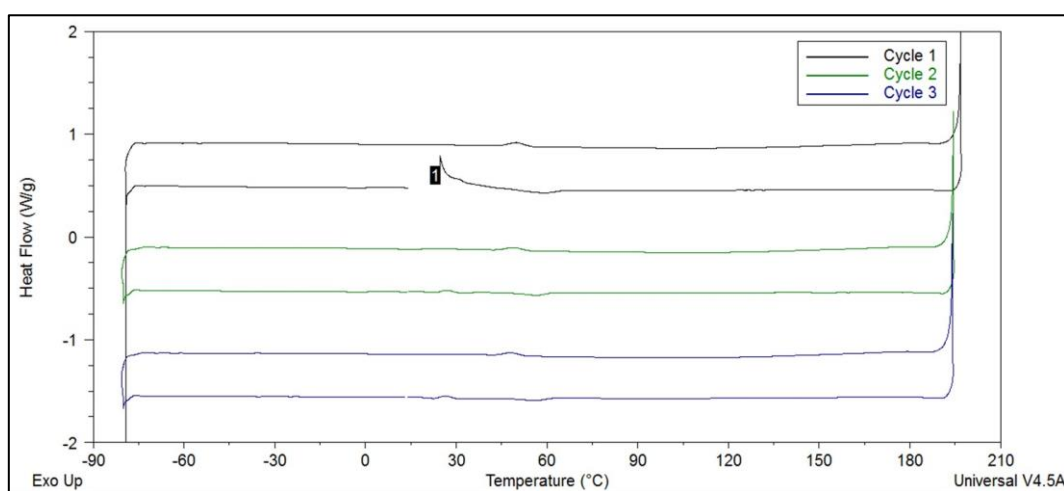

**Figure S22.** DSC curves for compound **4e** showing the three heating-cooling cycles.

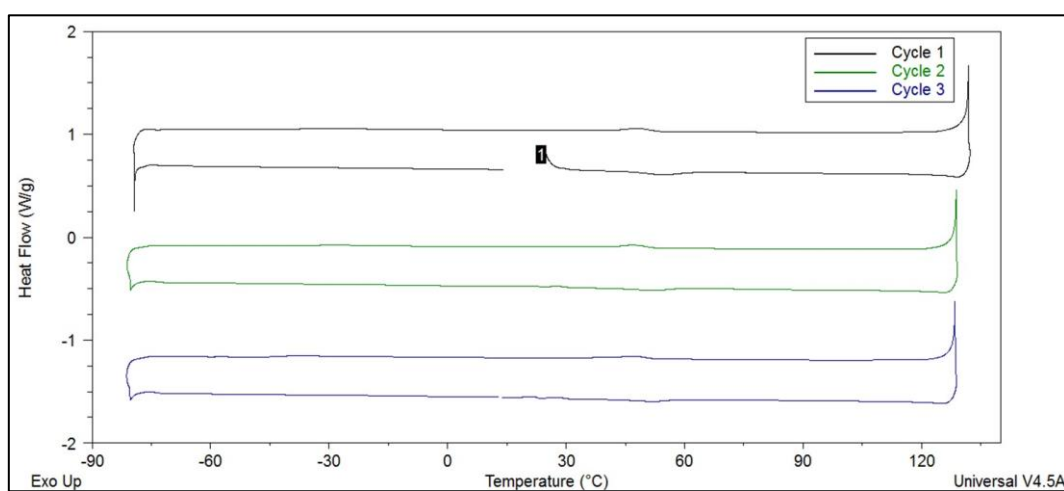

**Figure S23.** DSC curves for compound **4f** showing the three heating-cooling cycles.

7.  $^1\text{H}$ ,  $^{13}\text{C}$  and  $^{19}\text{F}$  NMR Spectra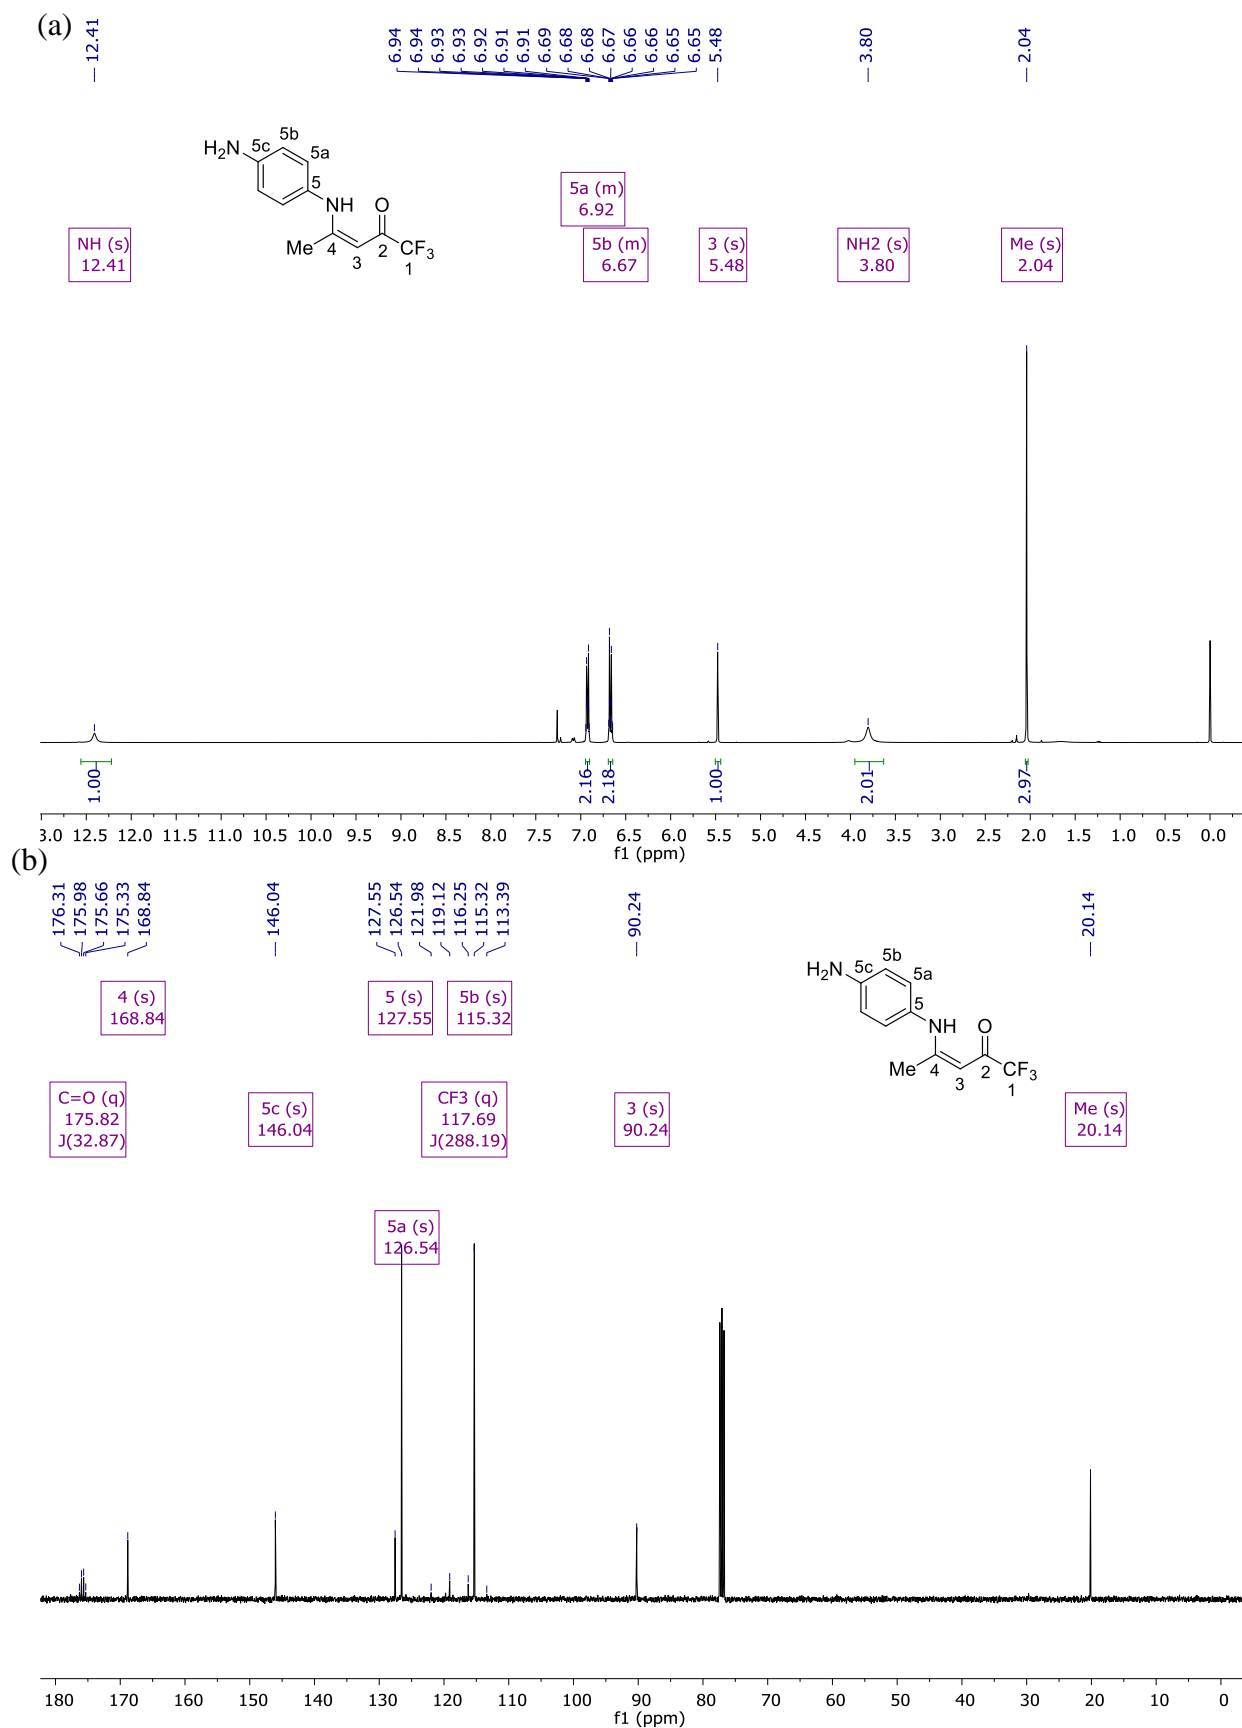

**Figure S24.** (a)  $^1\text{H}$  (400 MHz) and (b)  $^{13}\text{C}$  (100 MHz) NMR spectra of **3a** in  $\text{CDCl}_3$ .

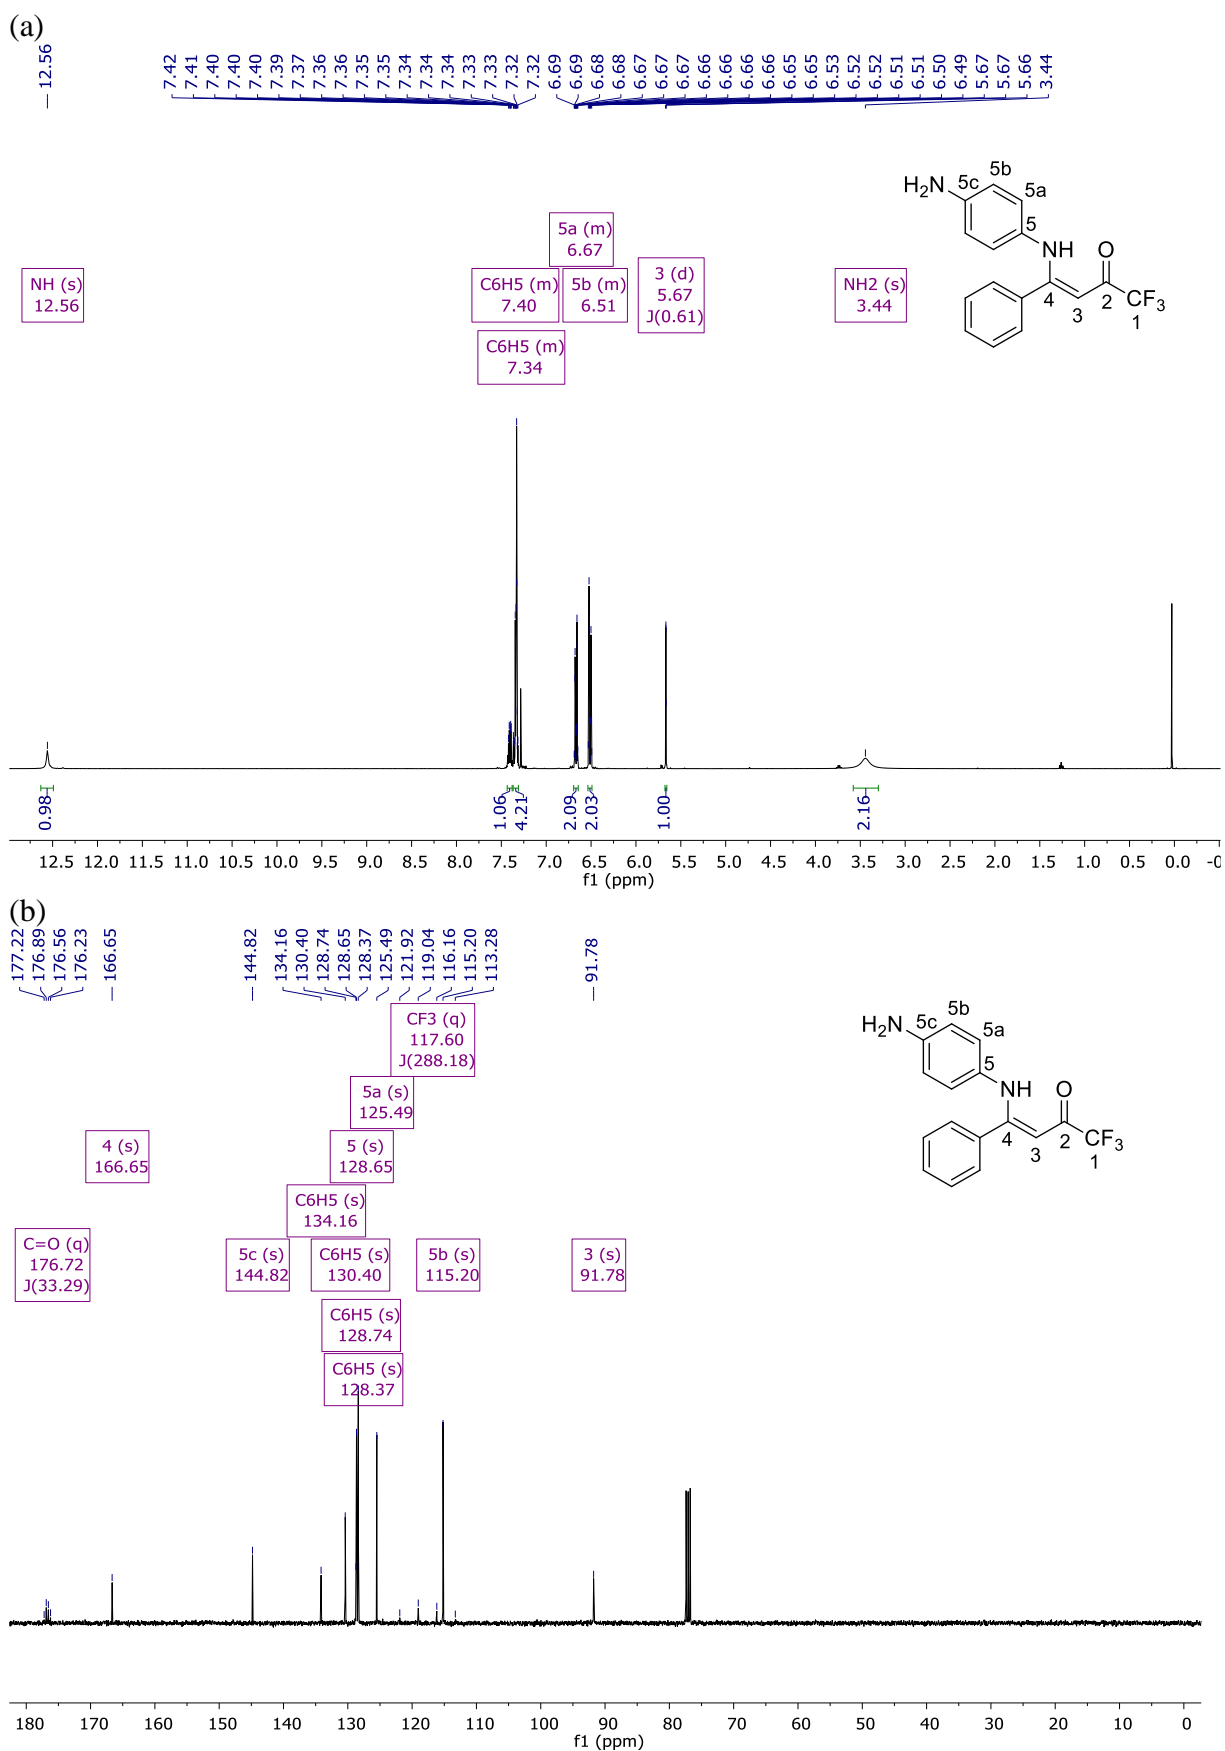

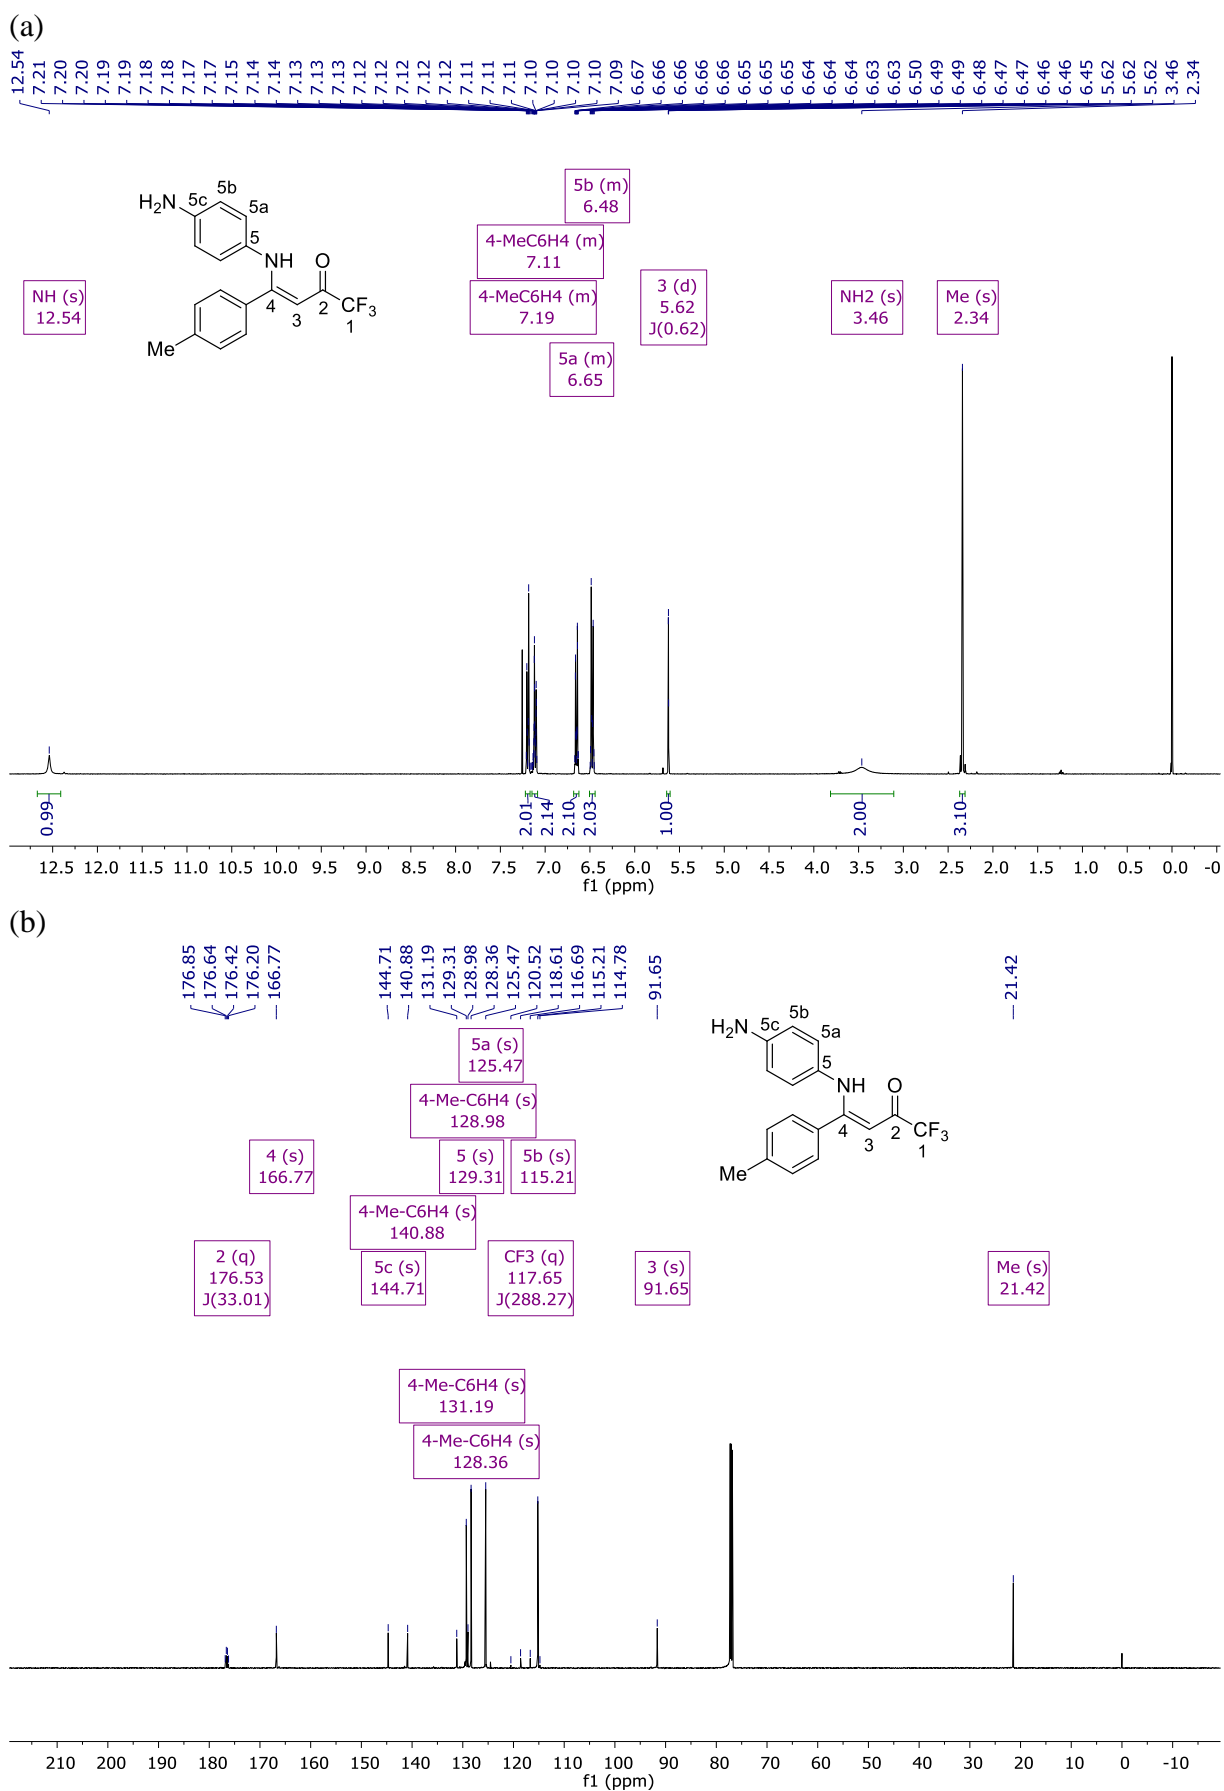

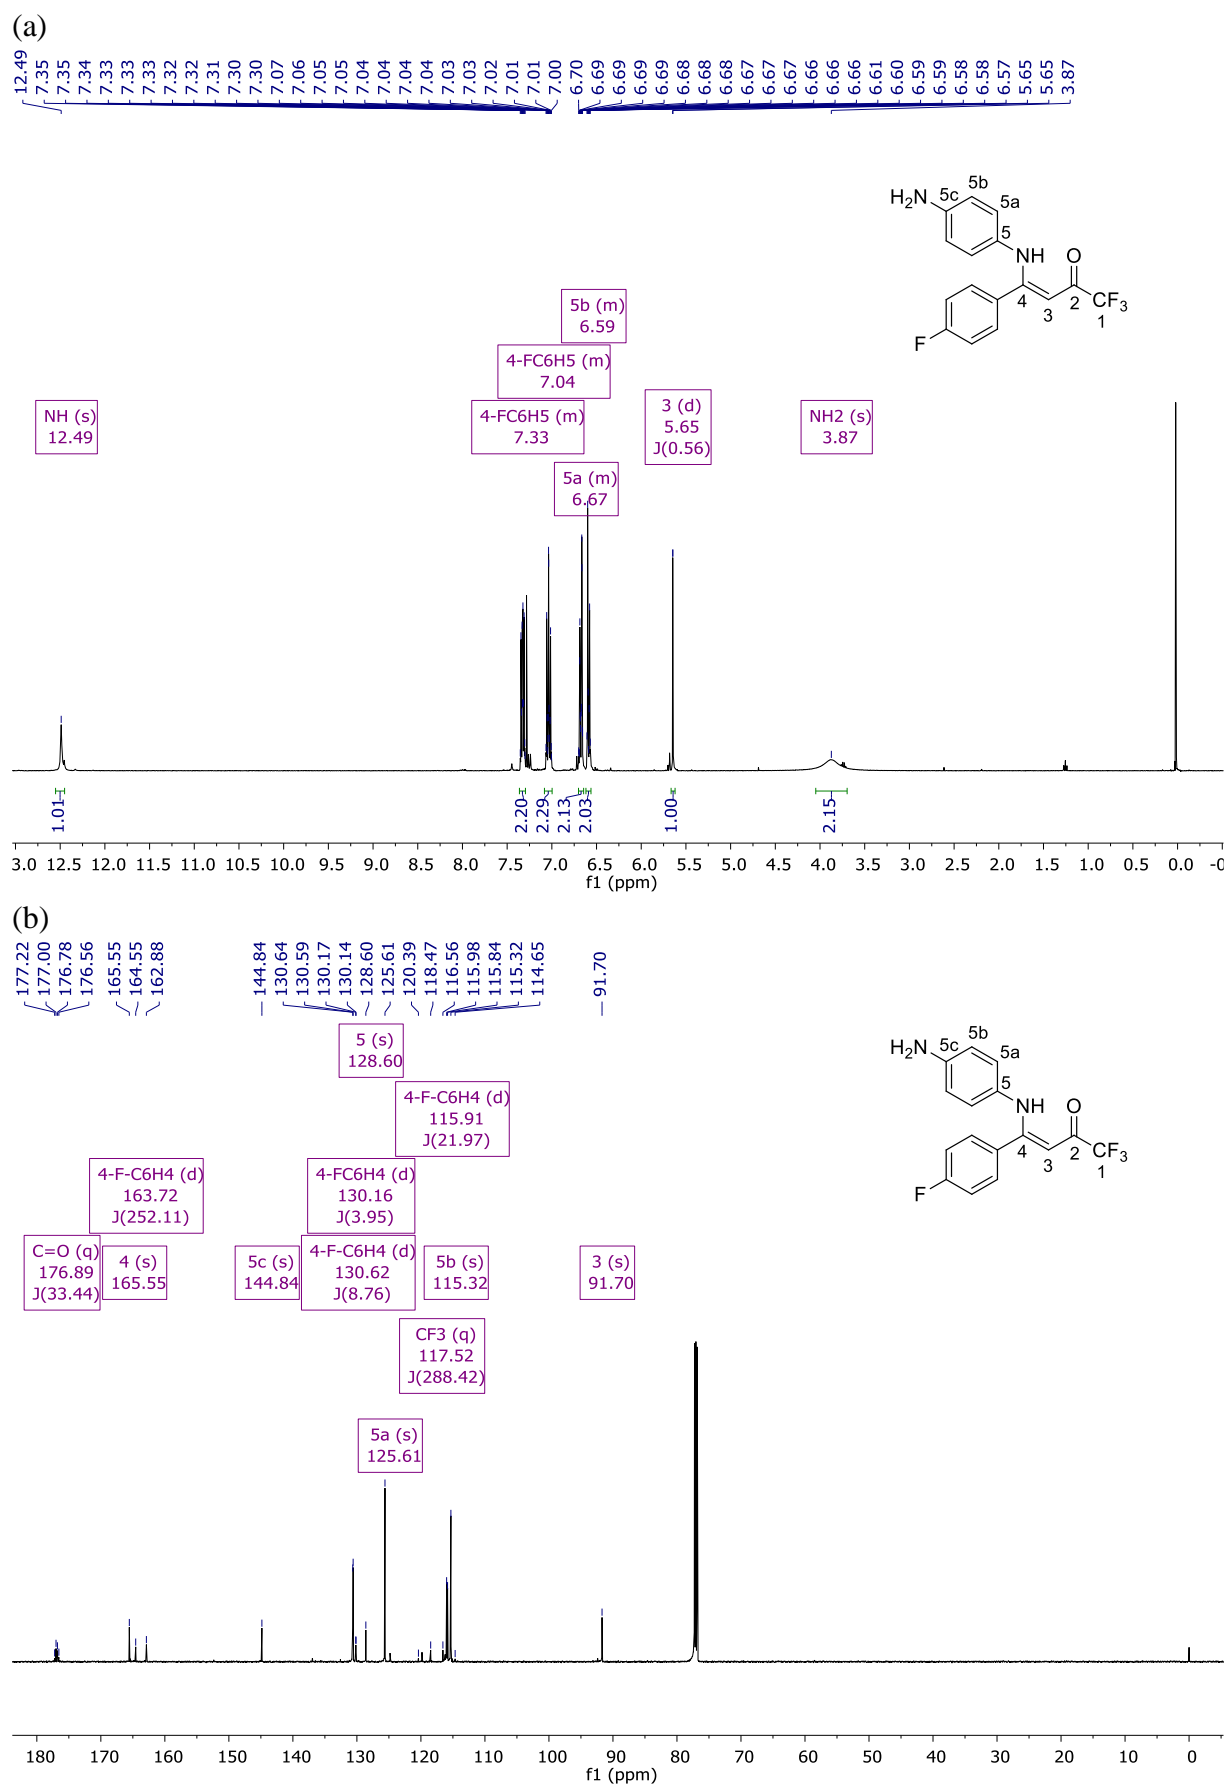

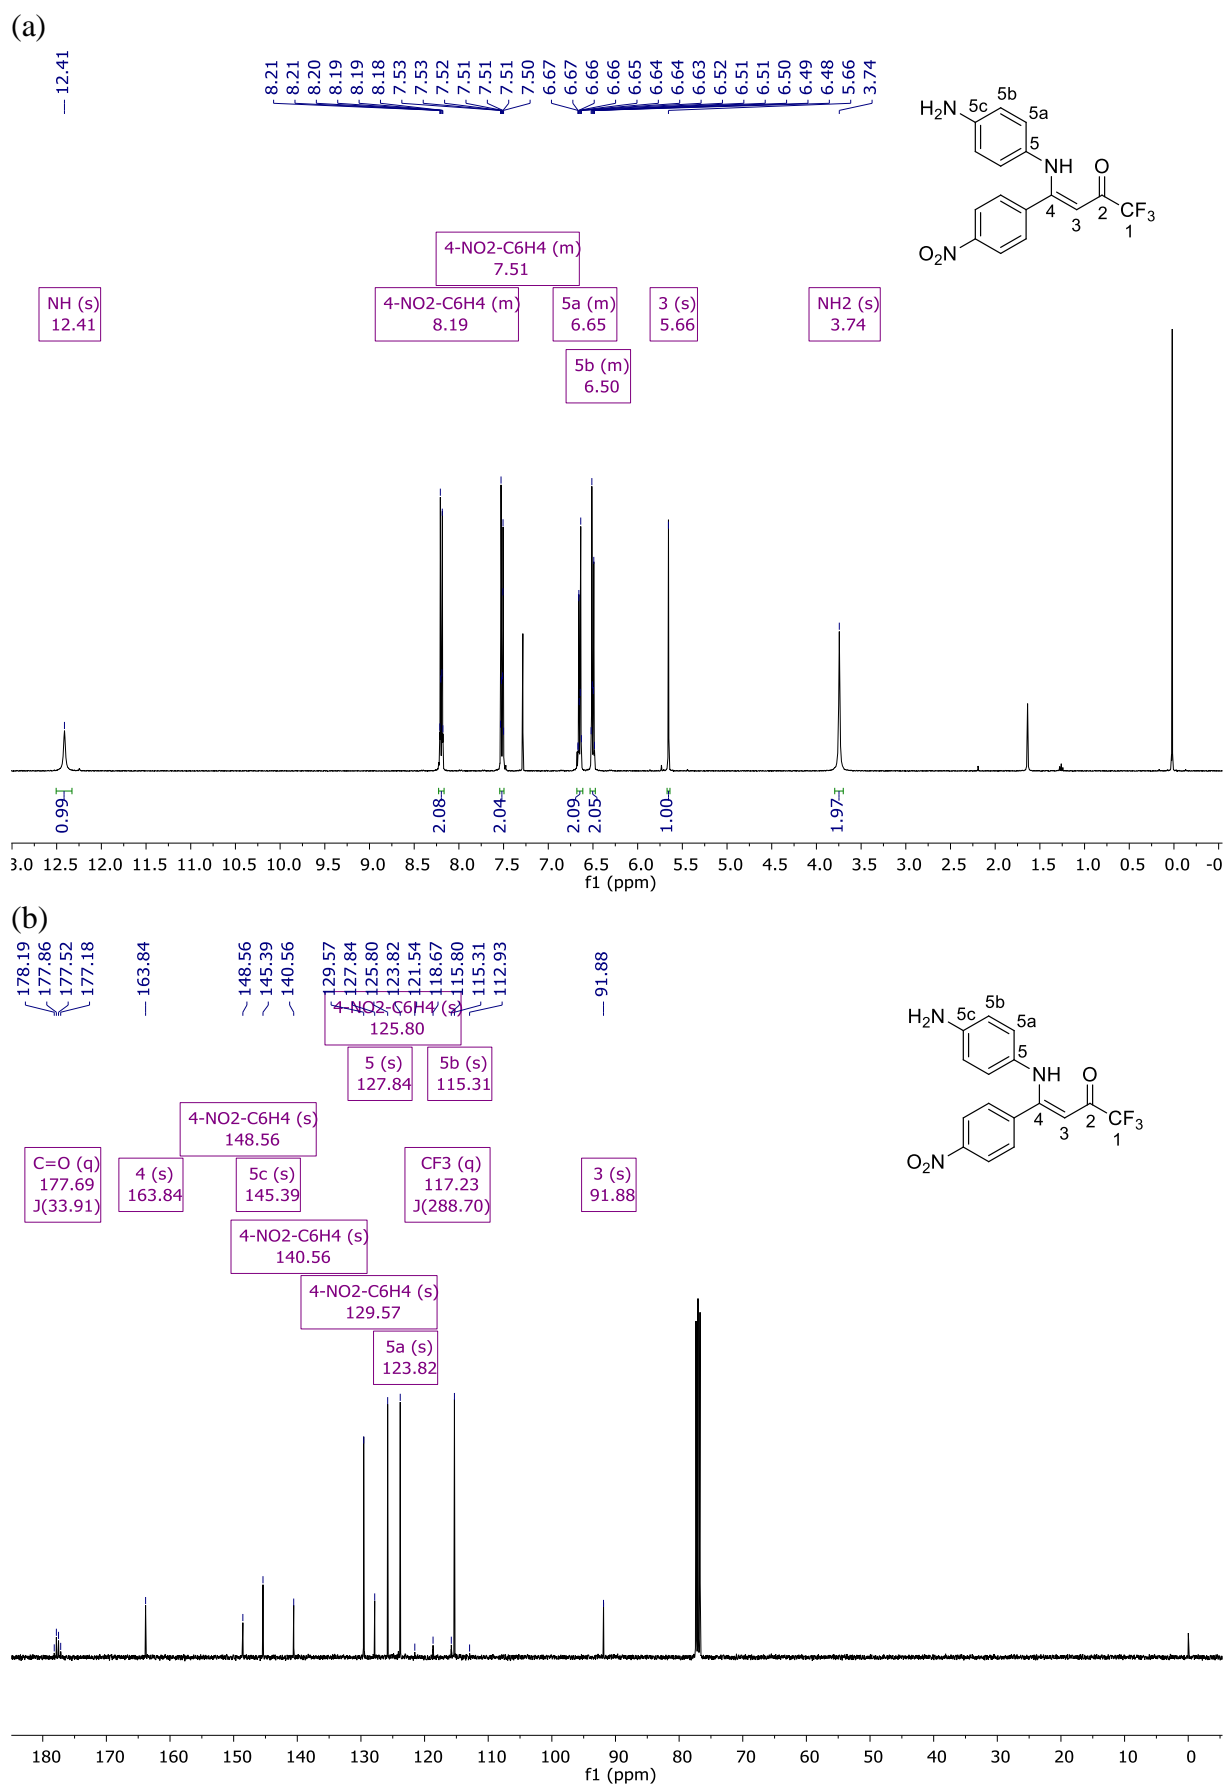

**Figure S28.** (a) <sup>1</sup>H (400 MHz) and (b) <sup>13</sup>C (100 MHz) NMR spectra of **3e** in CDCl<sub>3</sub>.

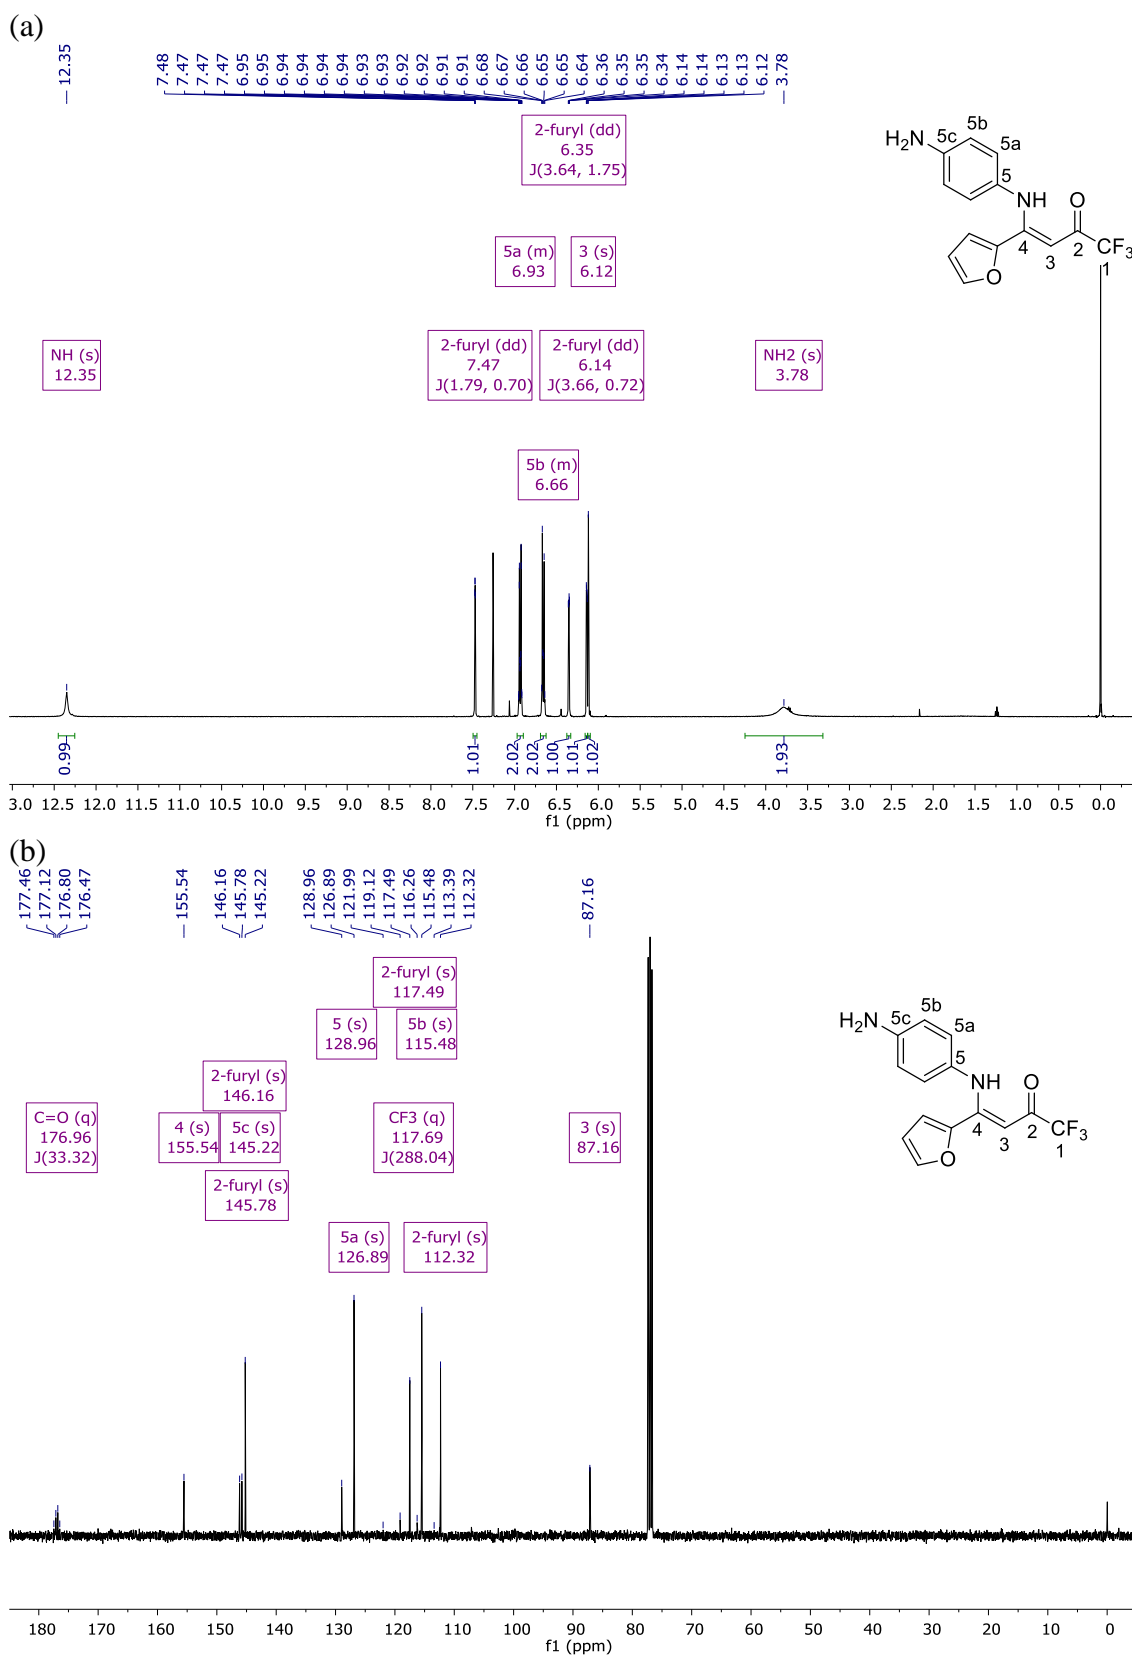

Figure S29. (a) <sup>1</sup>H (400 MHz) and (b) <sup>13</sup>C (100 MHz) NMR spectra of **3f** in CDCl<sub>3</sub>.

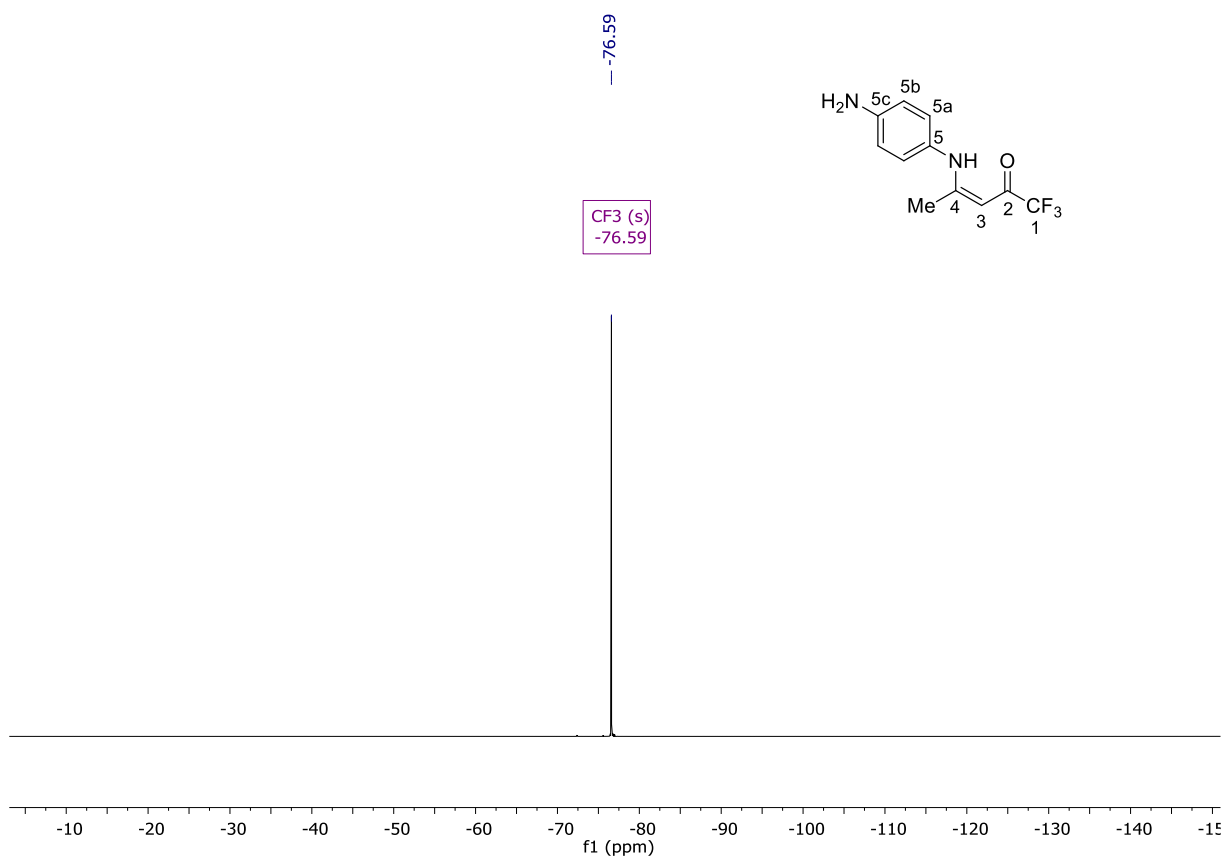

**Figure S30.**  $^{19}\text{F}$  (565 MHz) NMR spectra of **3a** in  $\text{CDCl}_3$ .

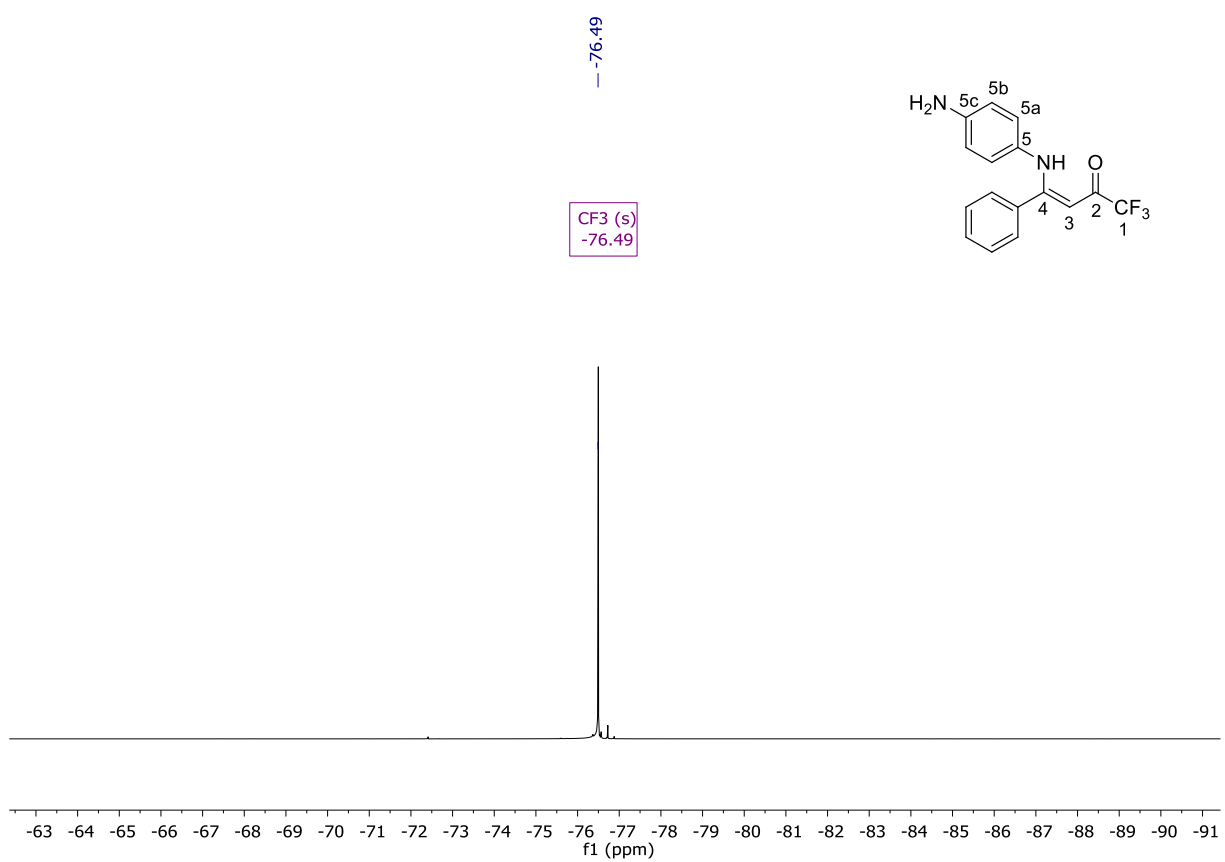

**Figure S31.**  $^{19}\text{F}$  (565 MHz) NMR spectra of **3b** in  $\text{CDCl}_3$ .



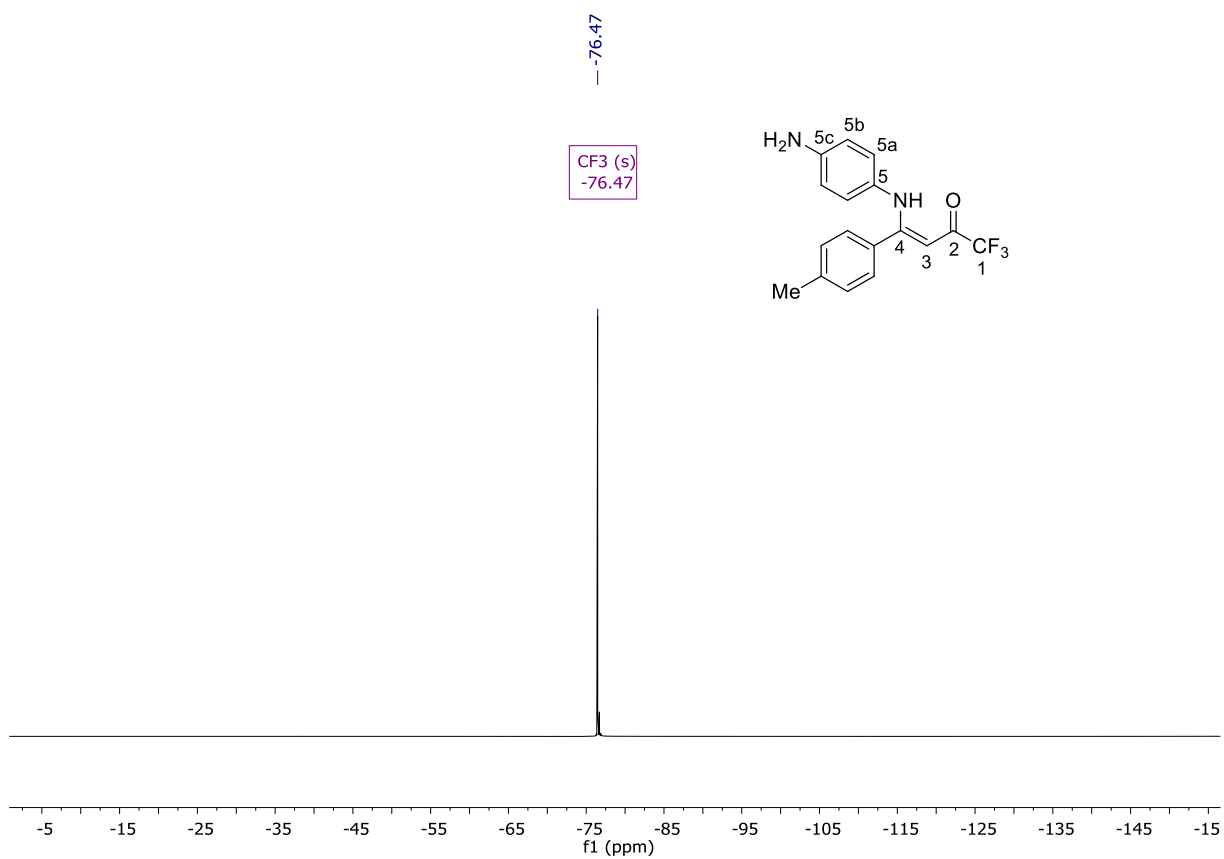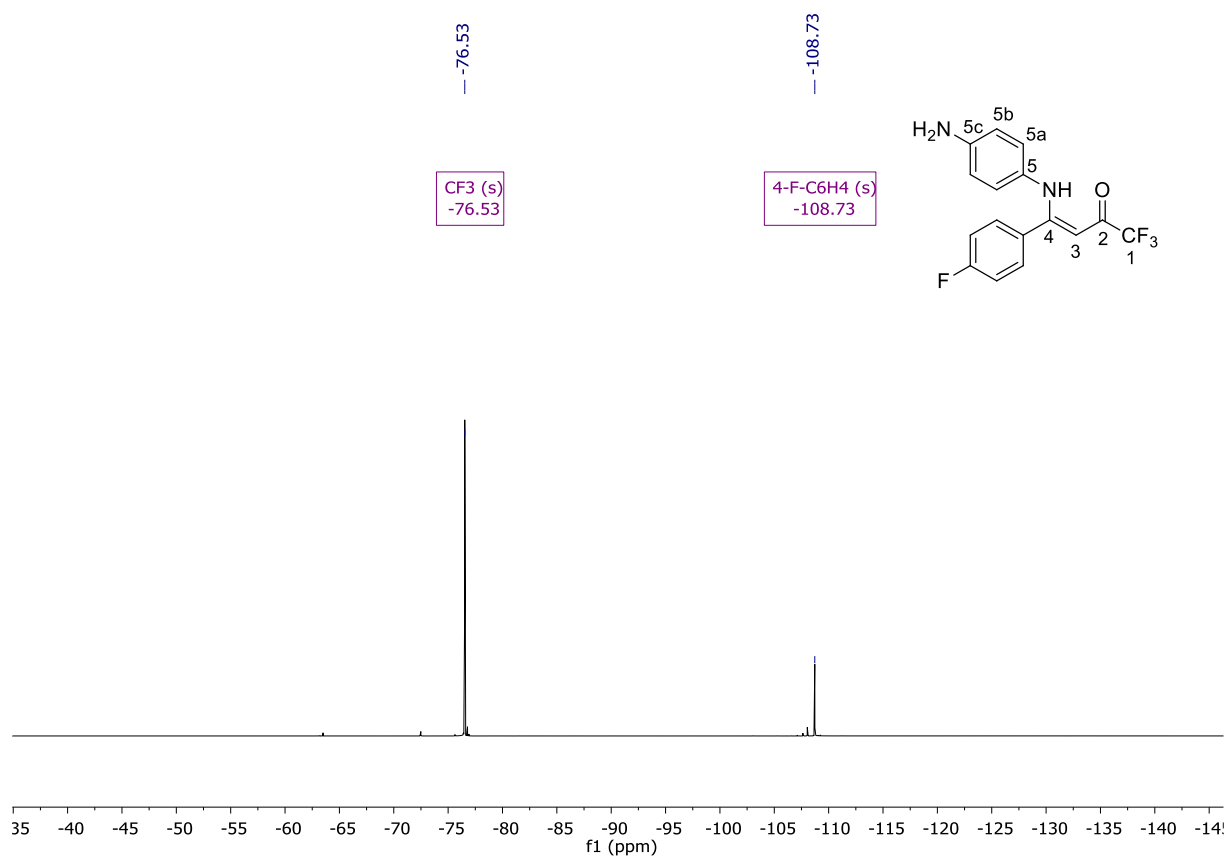

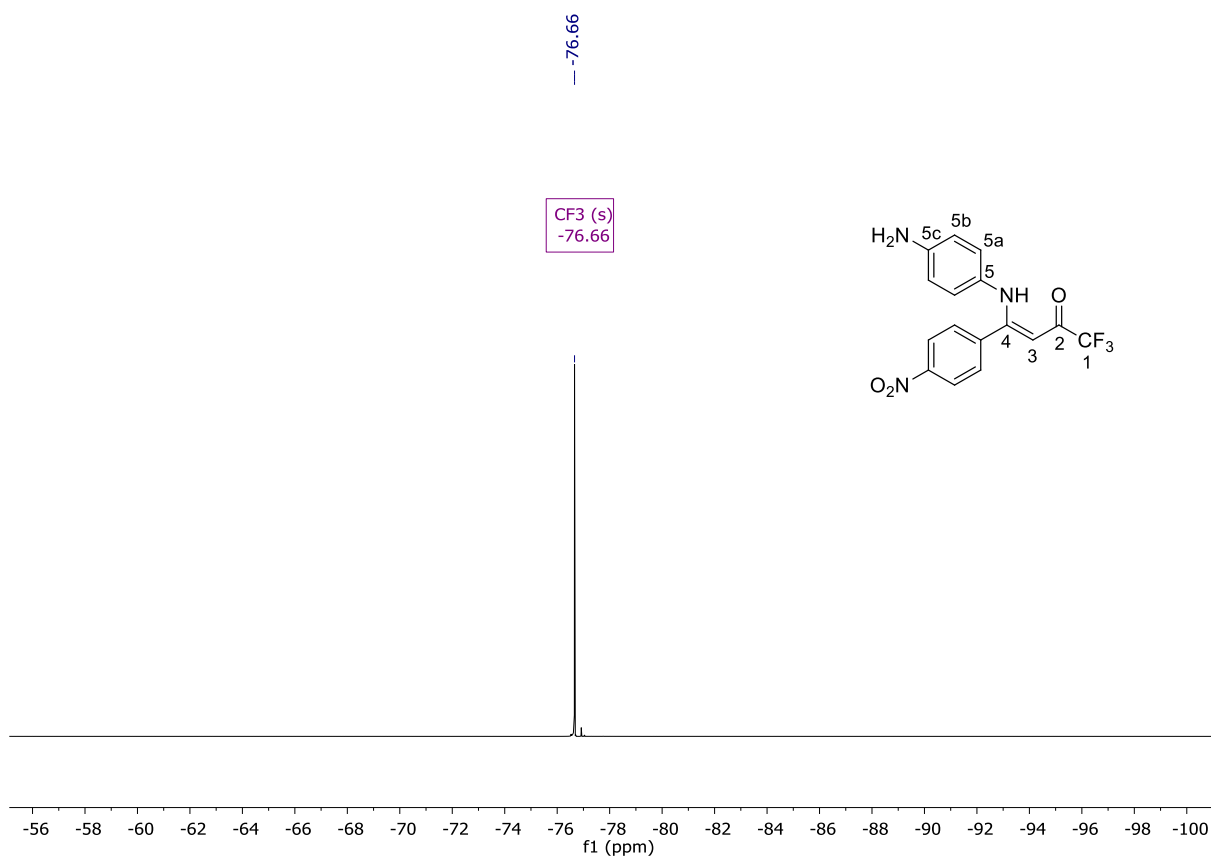

**Figure S34.** <sup>19</sup>F (565 MHz) NMR spectra of **3e** in CDCl<sub>3</sub>.

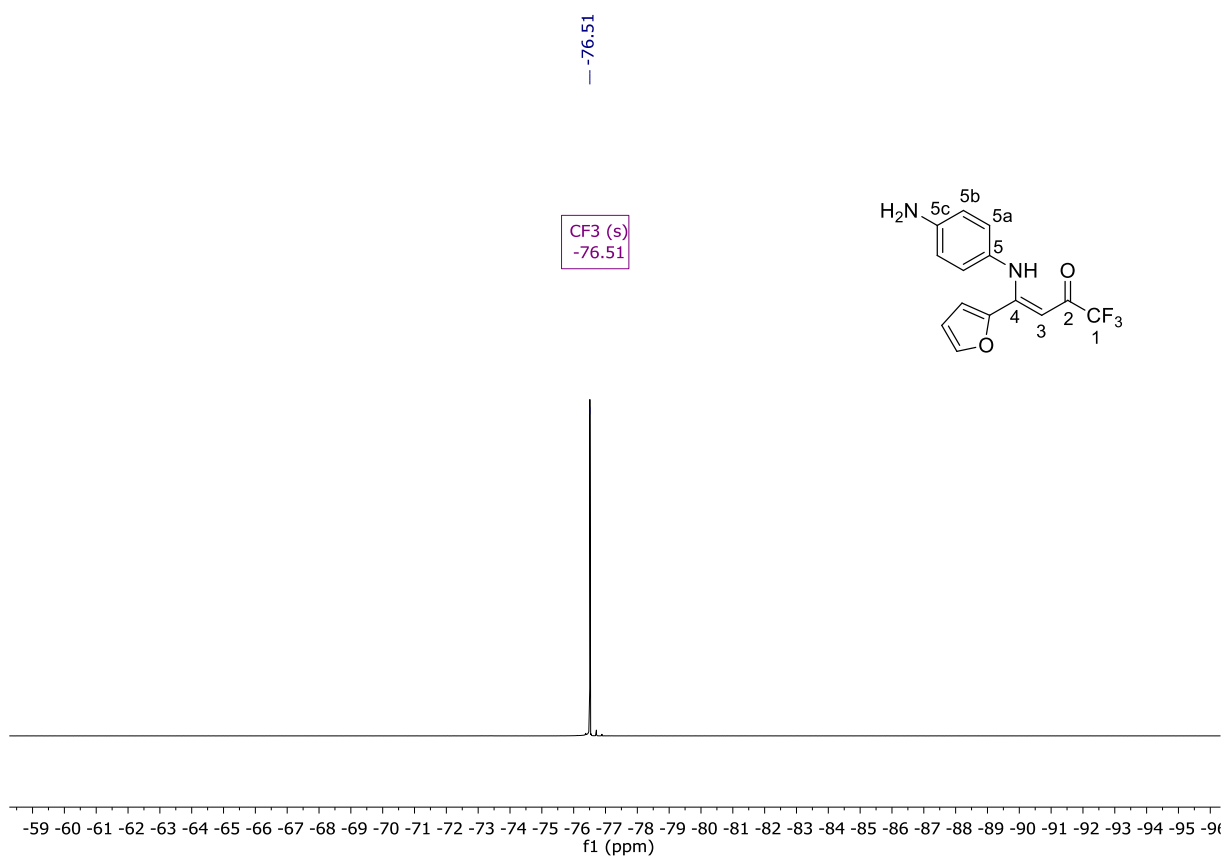

**Figure S35.** <sup>19</sup>F (565 MHz) NMR spectra of **3f** in CDCl<sub>3</sub>.

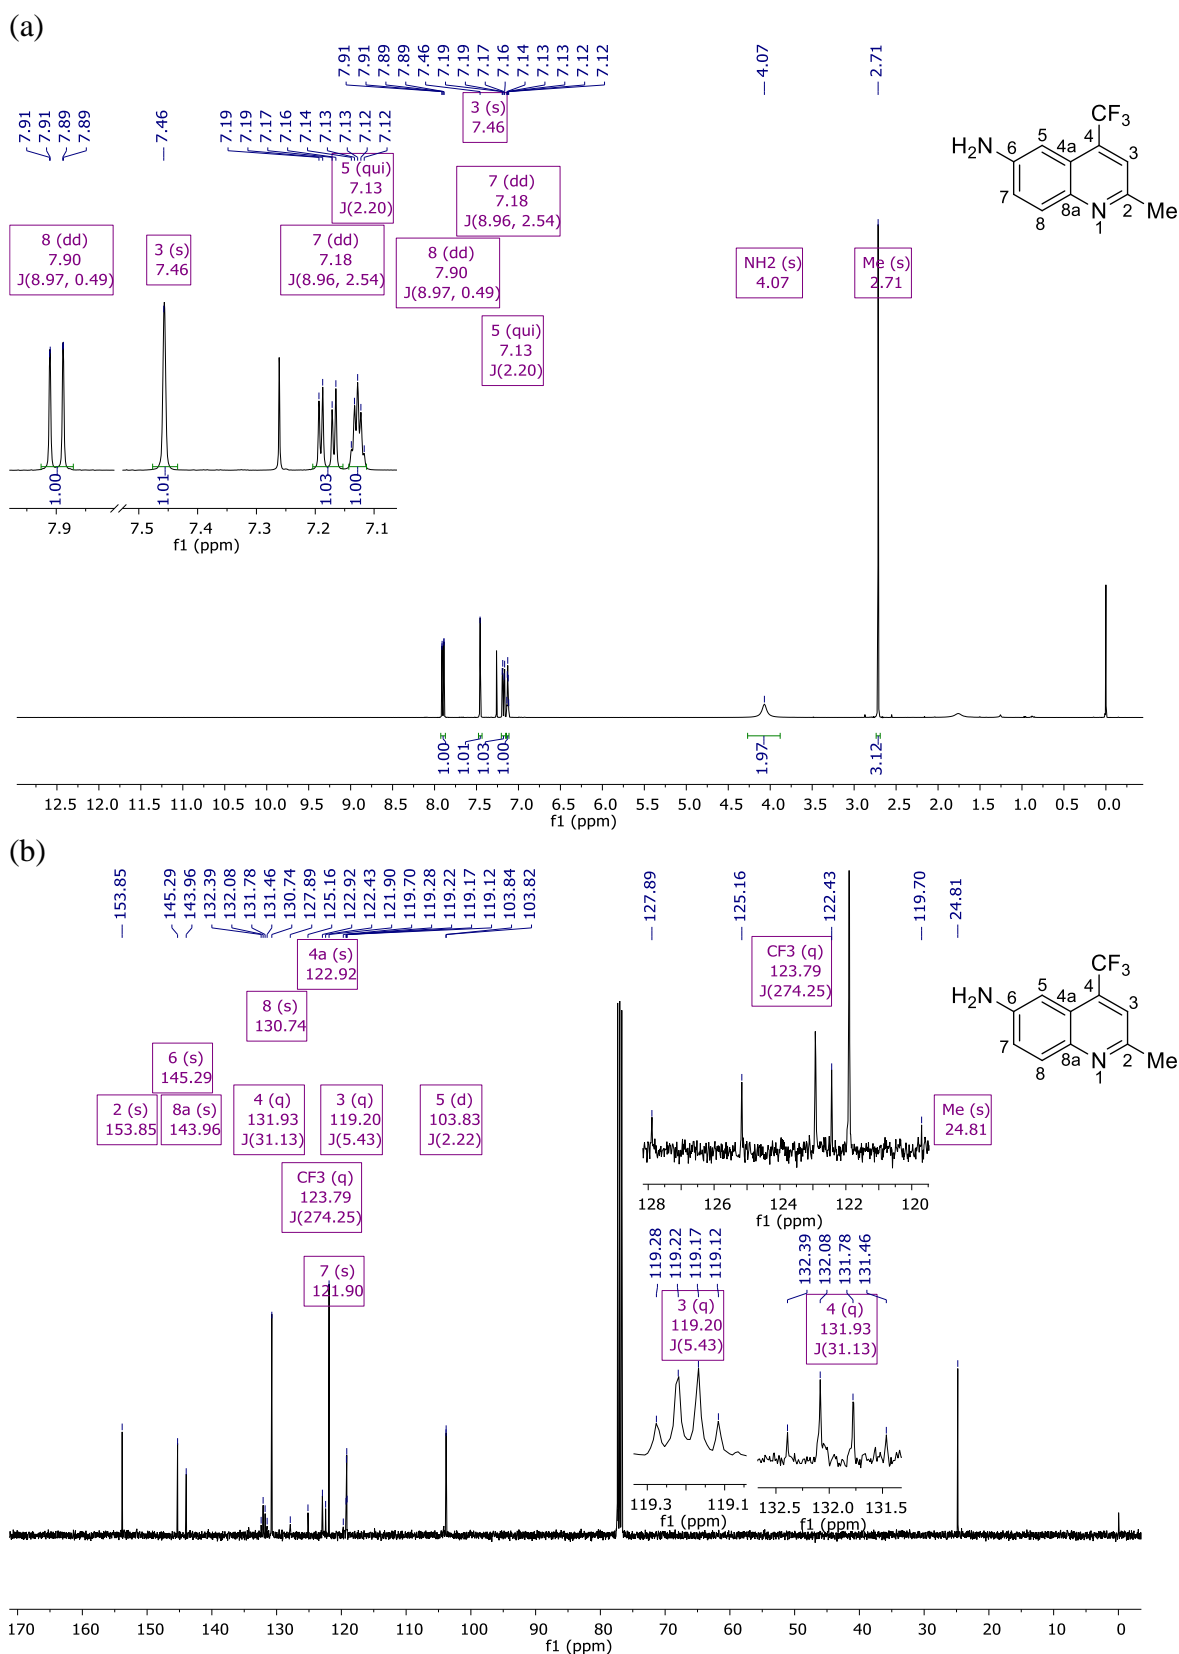

Figure S36. (a) <sup>1</sup>H (400 MHz) and (b) <sup>13</sup>C (100 MHz) NMR spectra of **4a** in CDCl<sub>3</sub>.

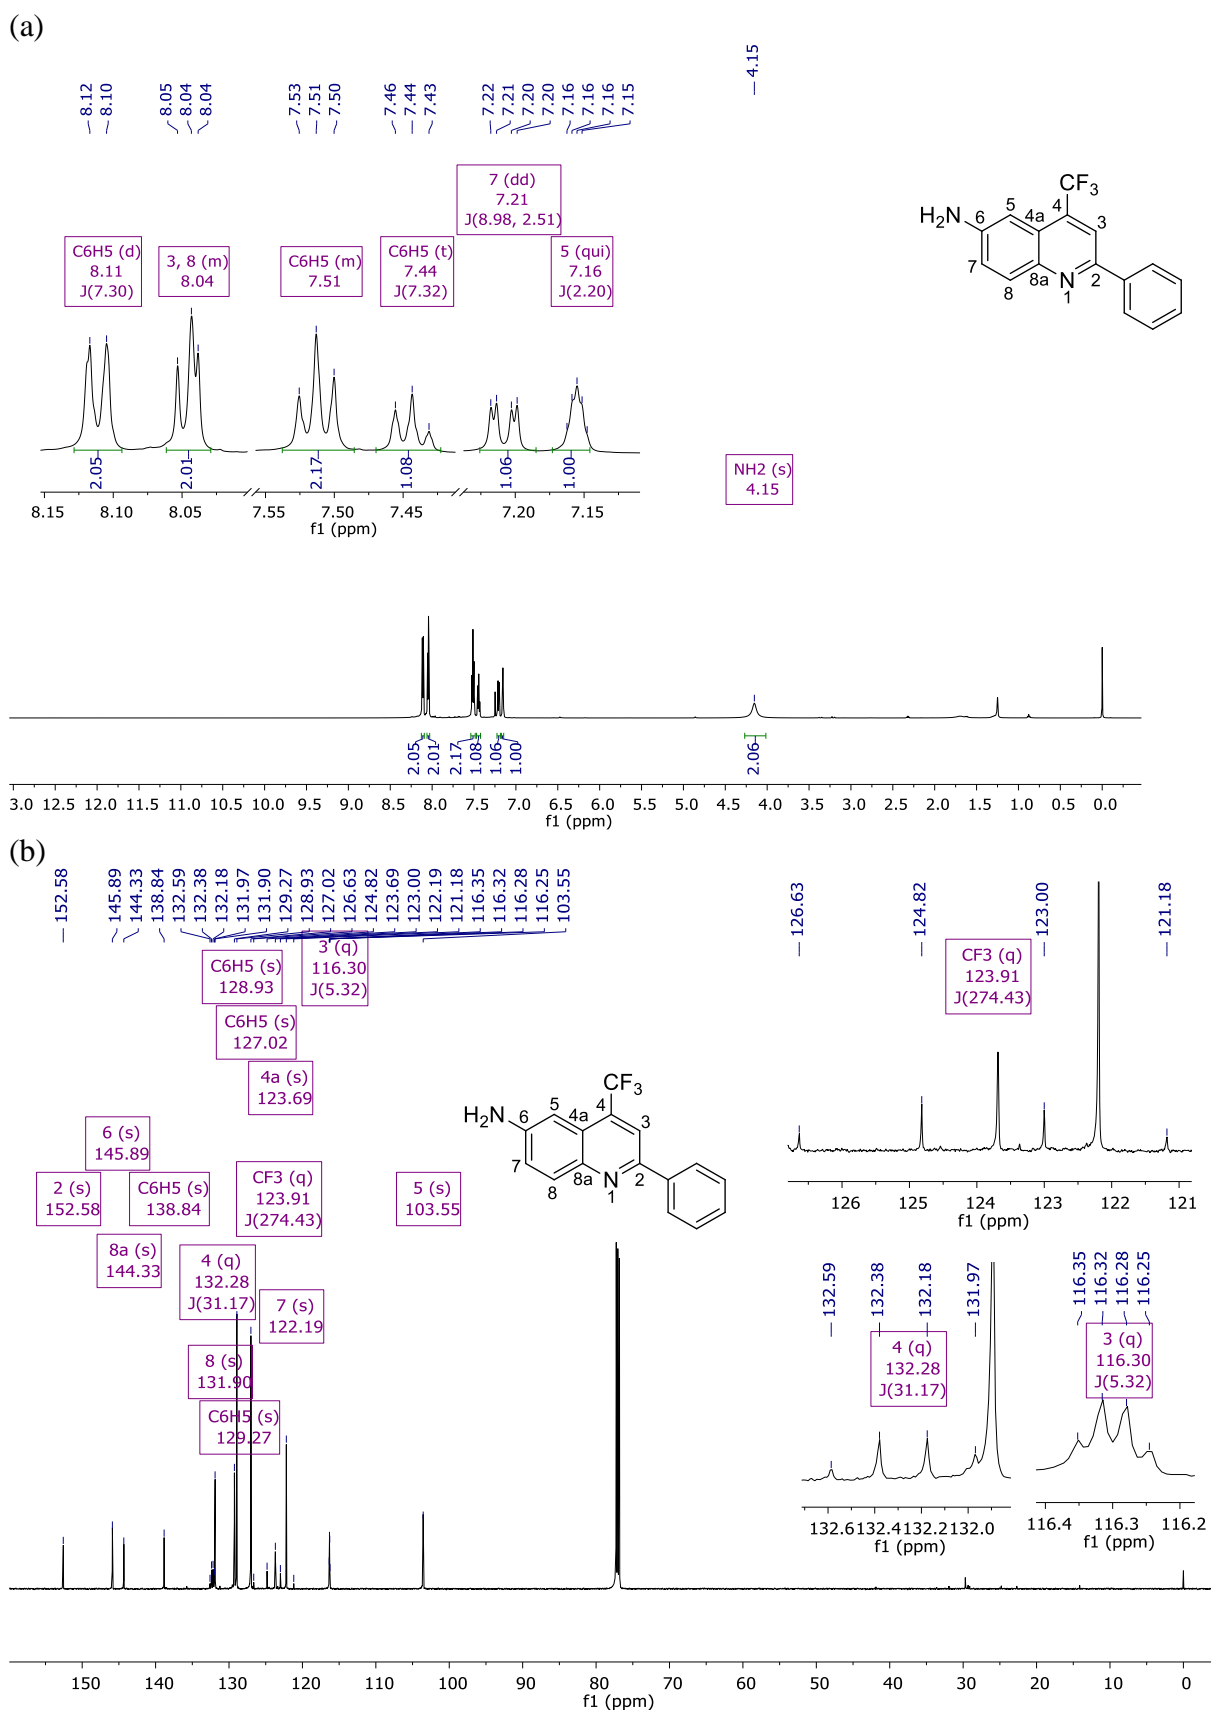

**Figure S37.** (a)  $^1\text{H}$  (600 MHz) and (b)  $^{13}\text{C}$  (150 MHz) NMR spectra of **4b** in  $\text{CDCl}_3$ .

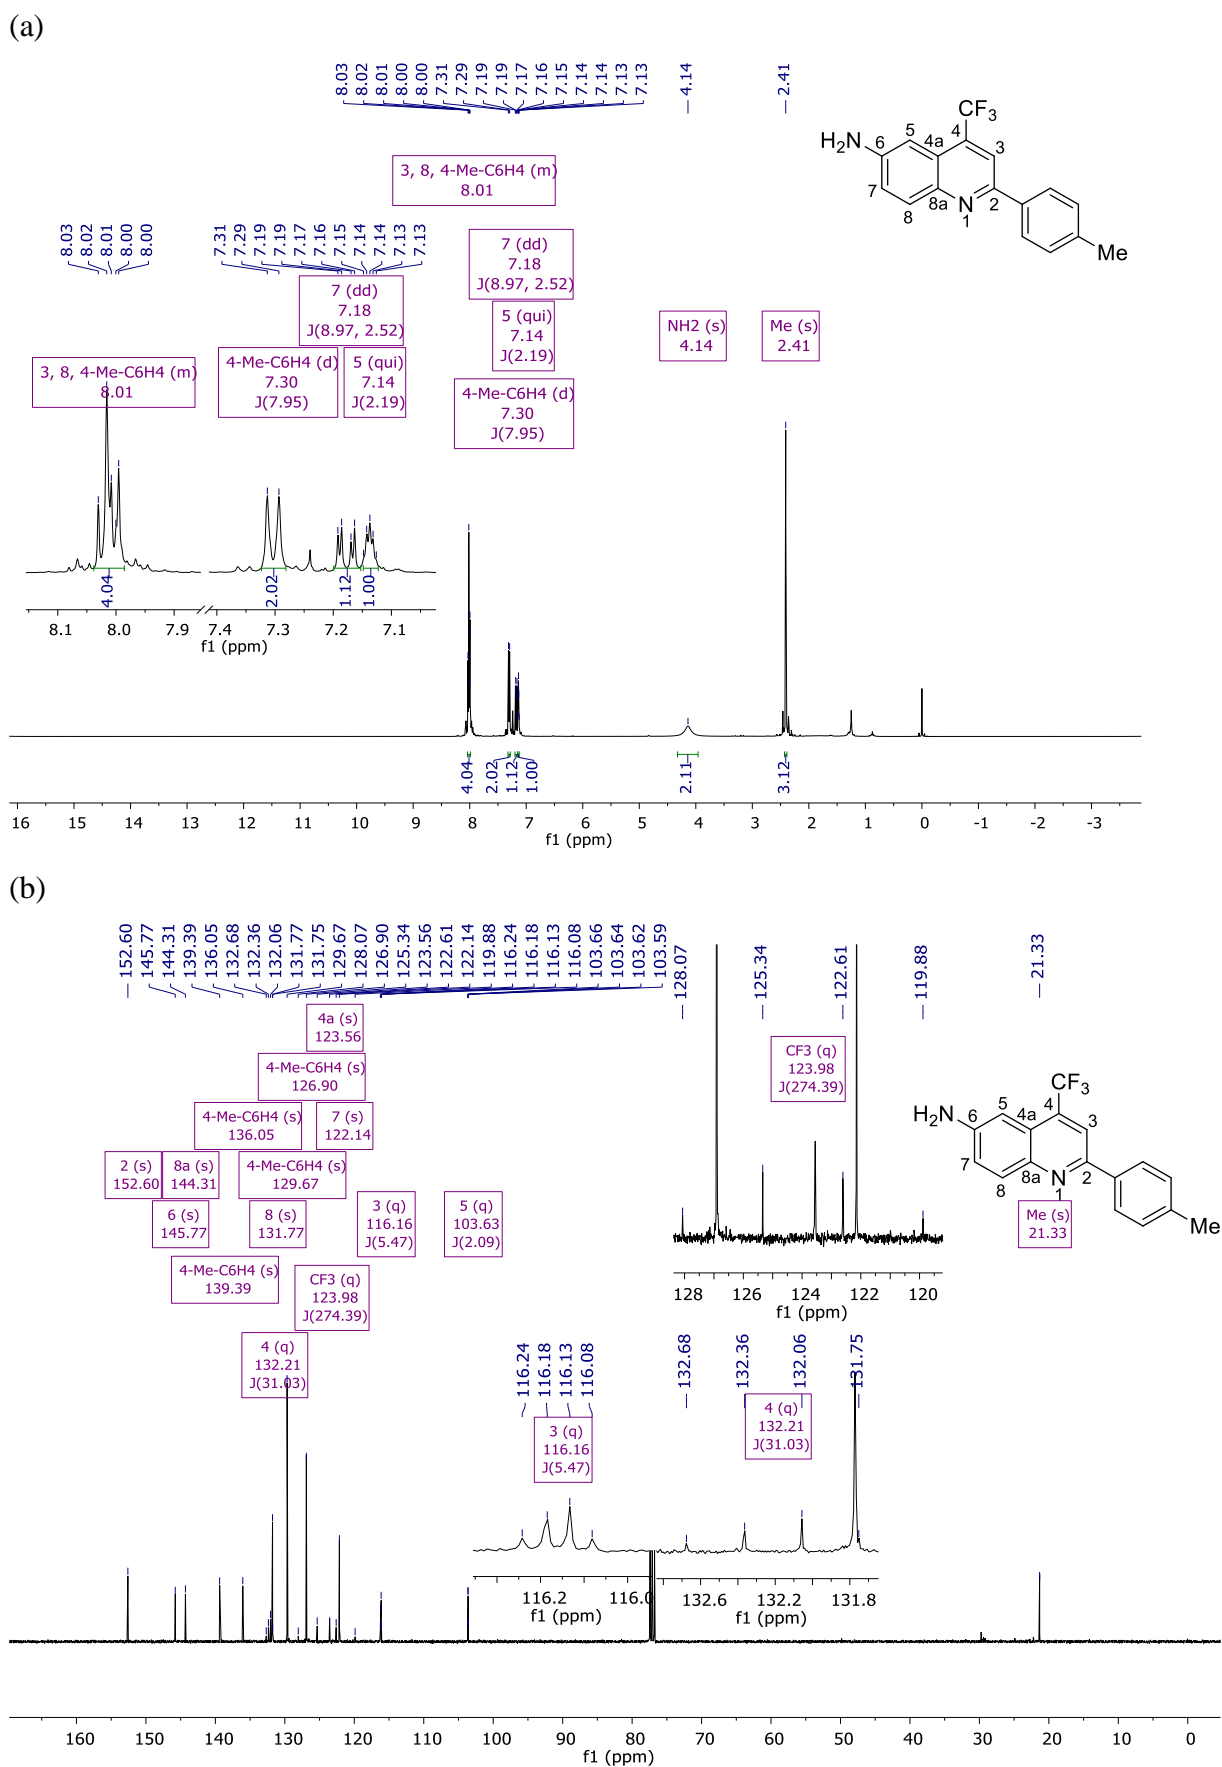

**Figure S38.** (a) <sup>1</sup>H (400 MHz) and (b) <sup>13</sup>C (100 MHz) NMR spectra of **4c** in CDCl<sub>3</sub>.

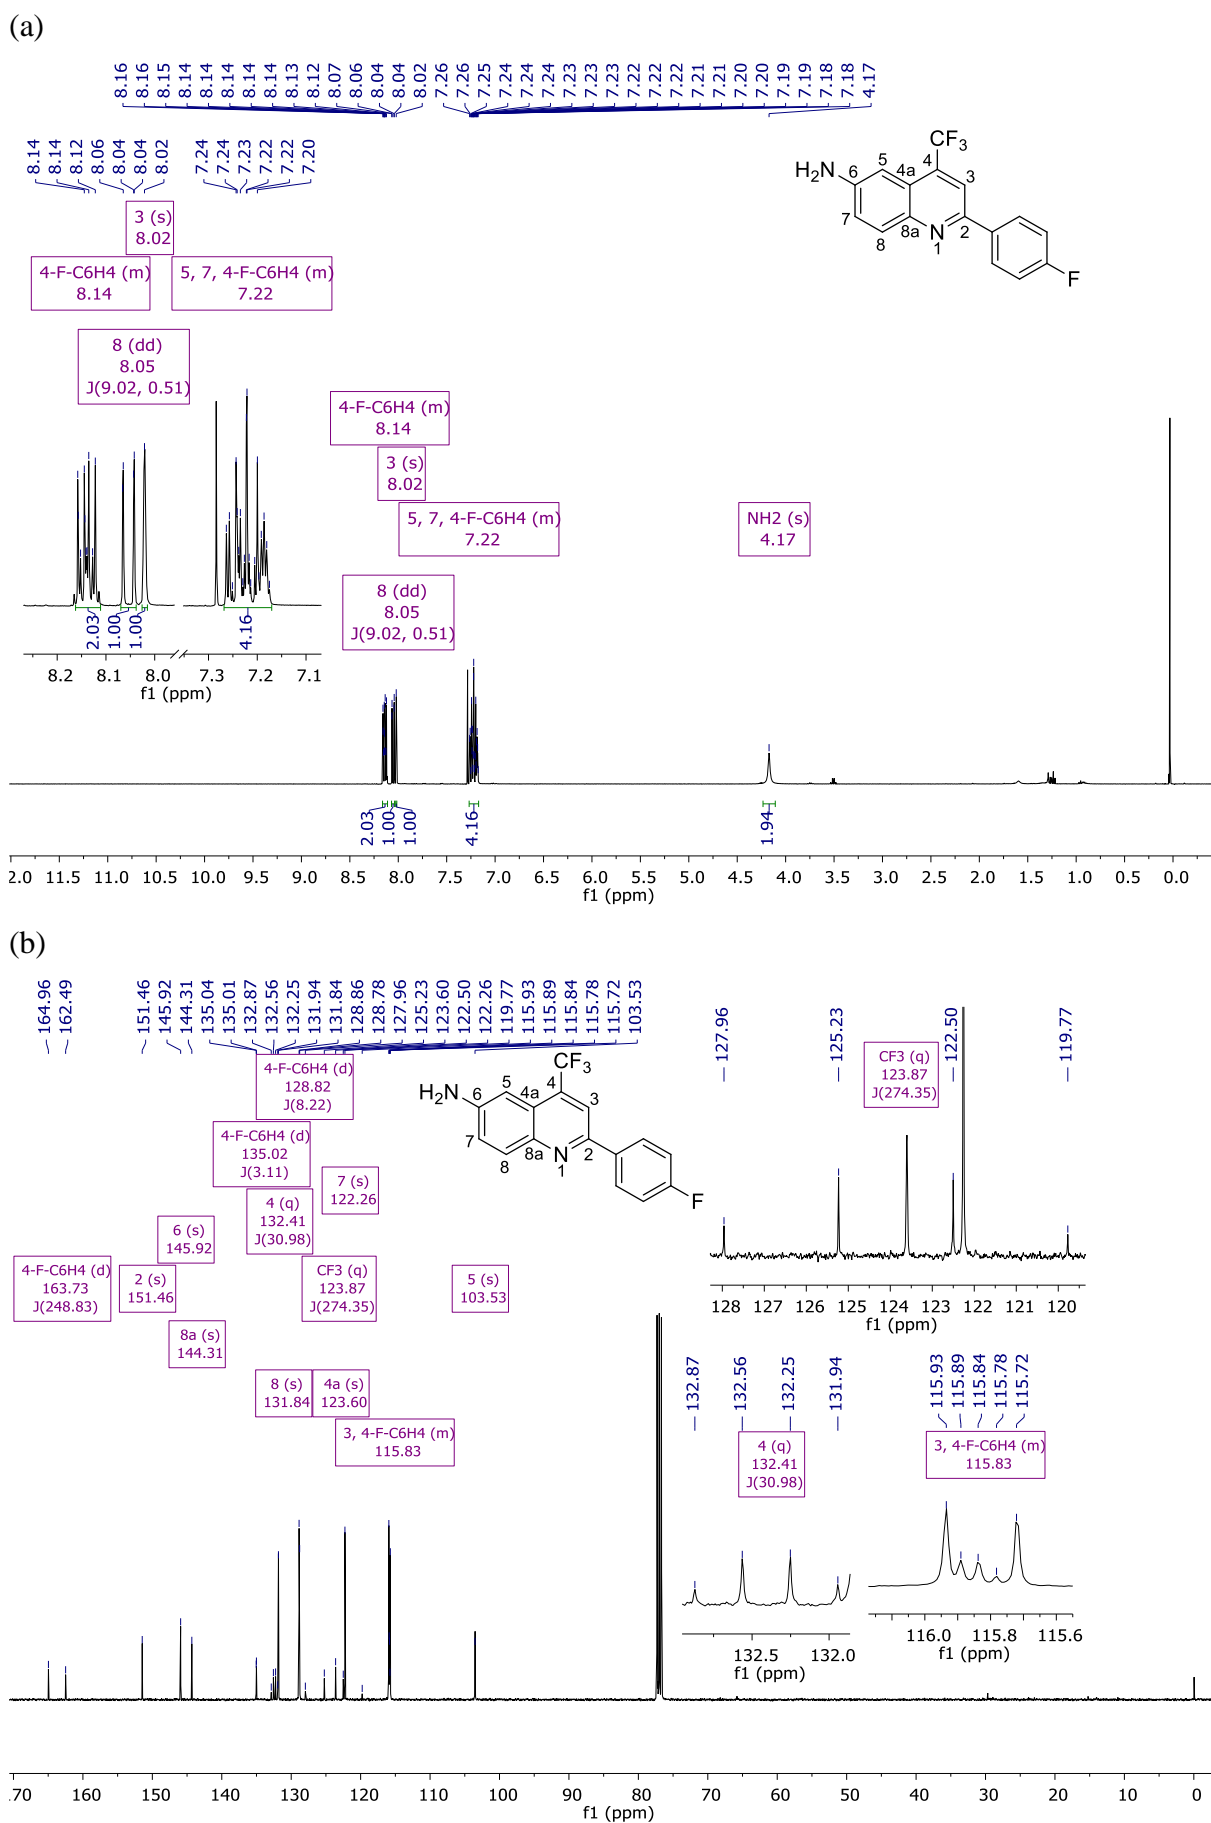

**Figure S39.** (a)  $^1\text{H}$  (400 MHz) and (b)  $^{13}\text{C}$  (100 MHz) NMR spectra of **4d** in  $\text{CDCl}_3$ .

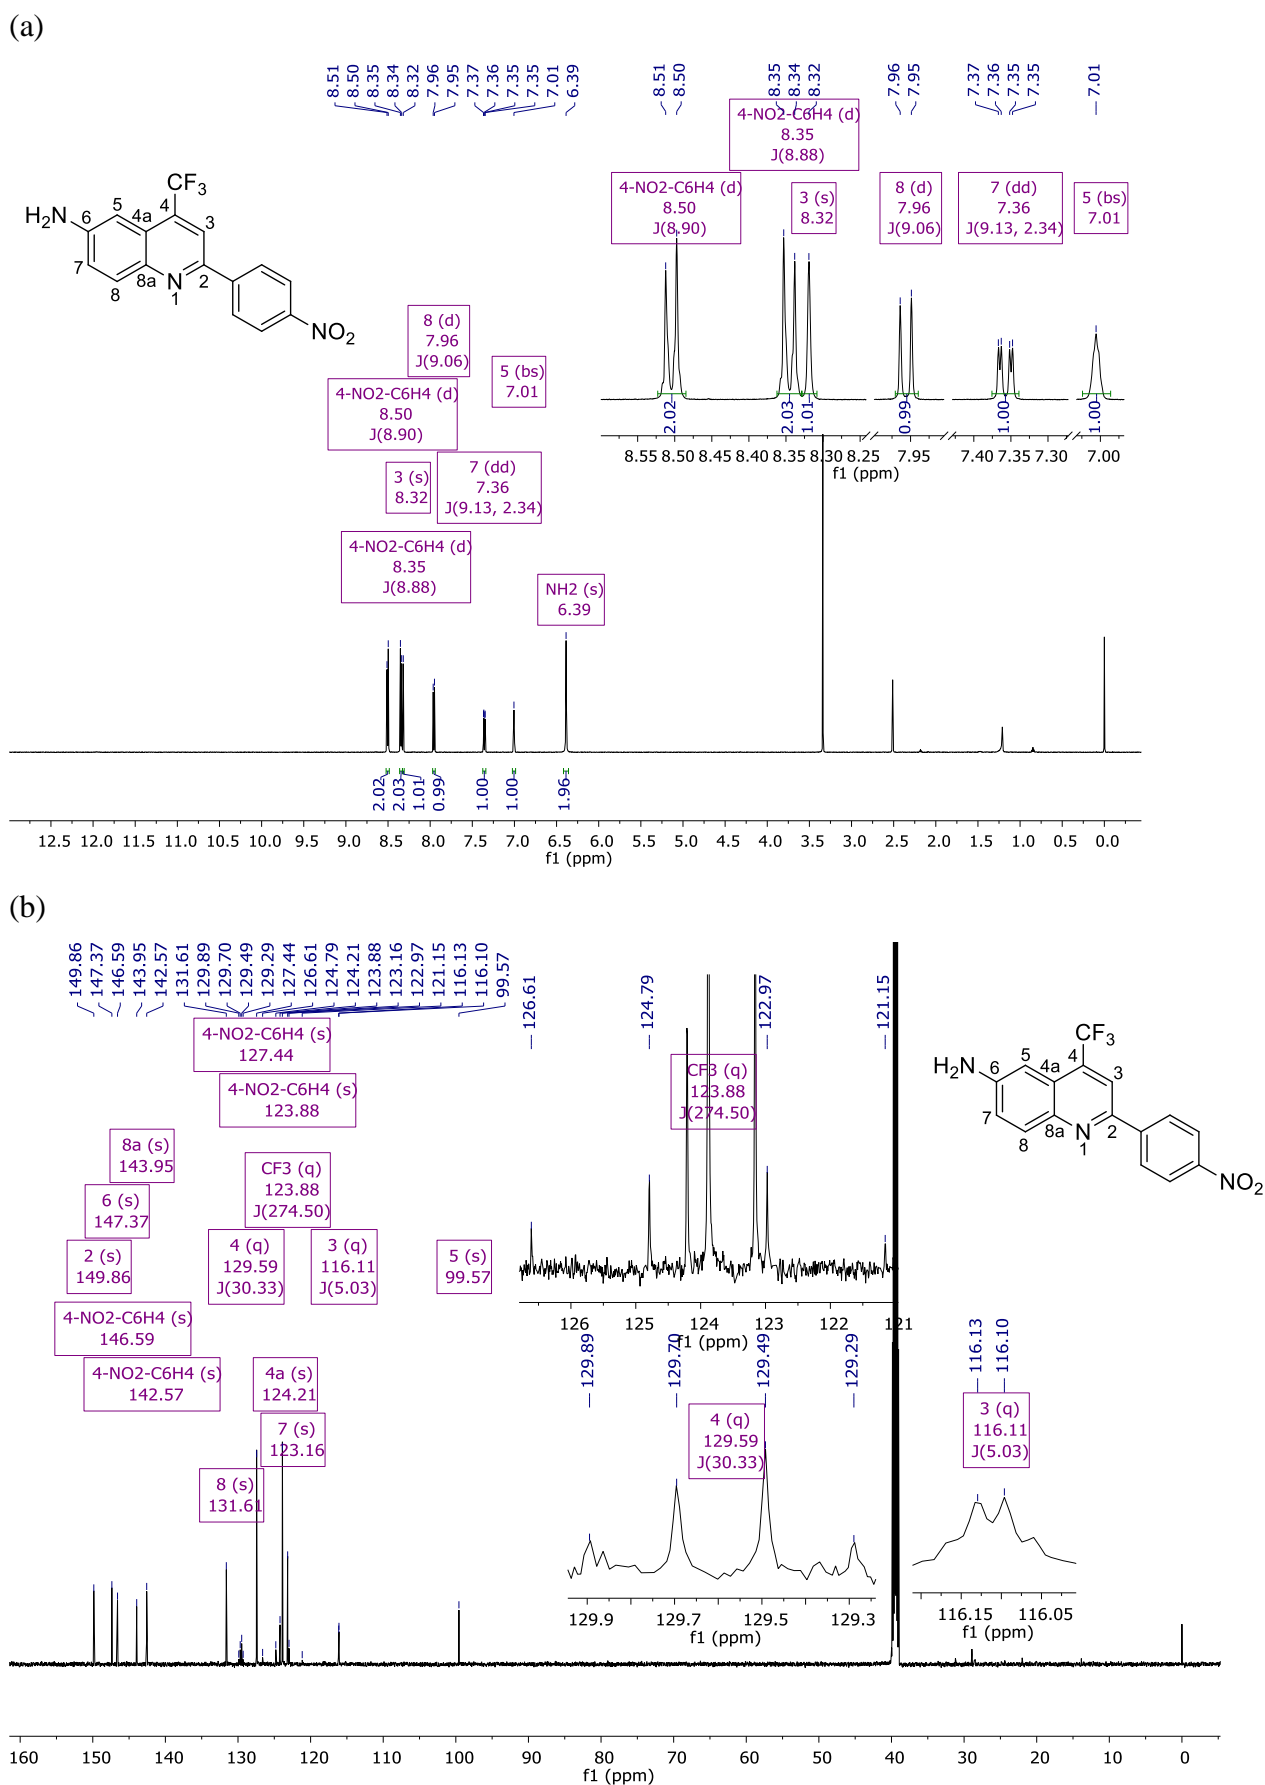

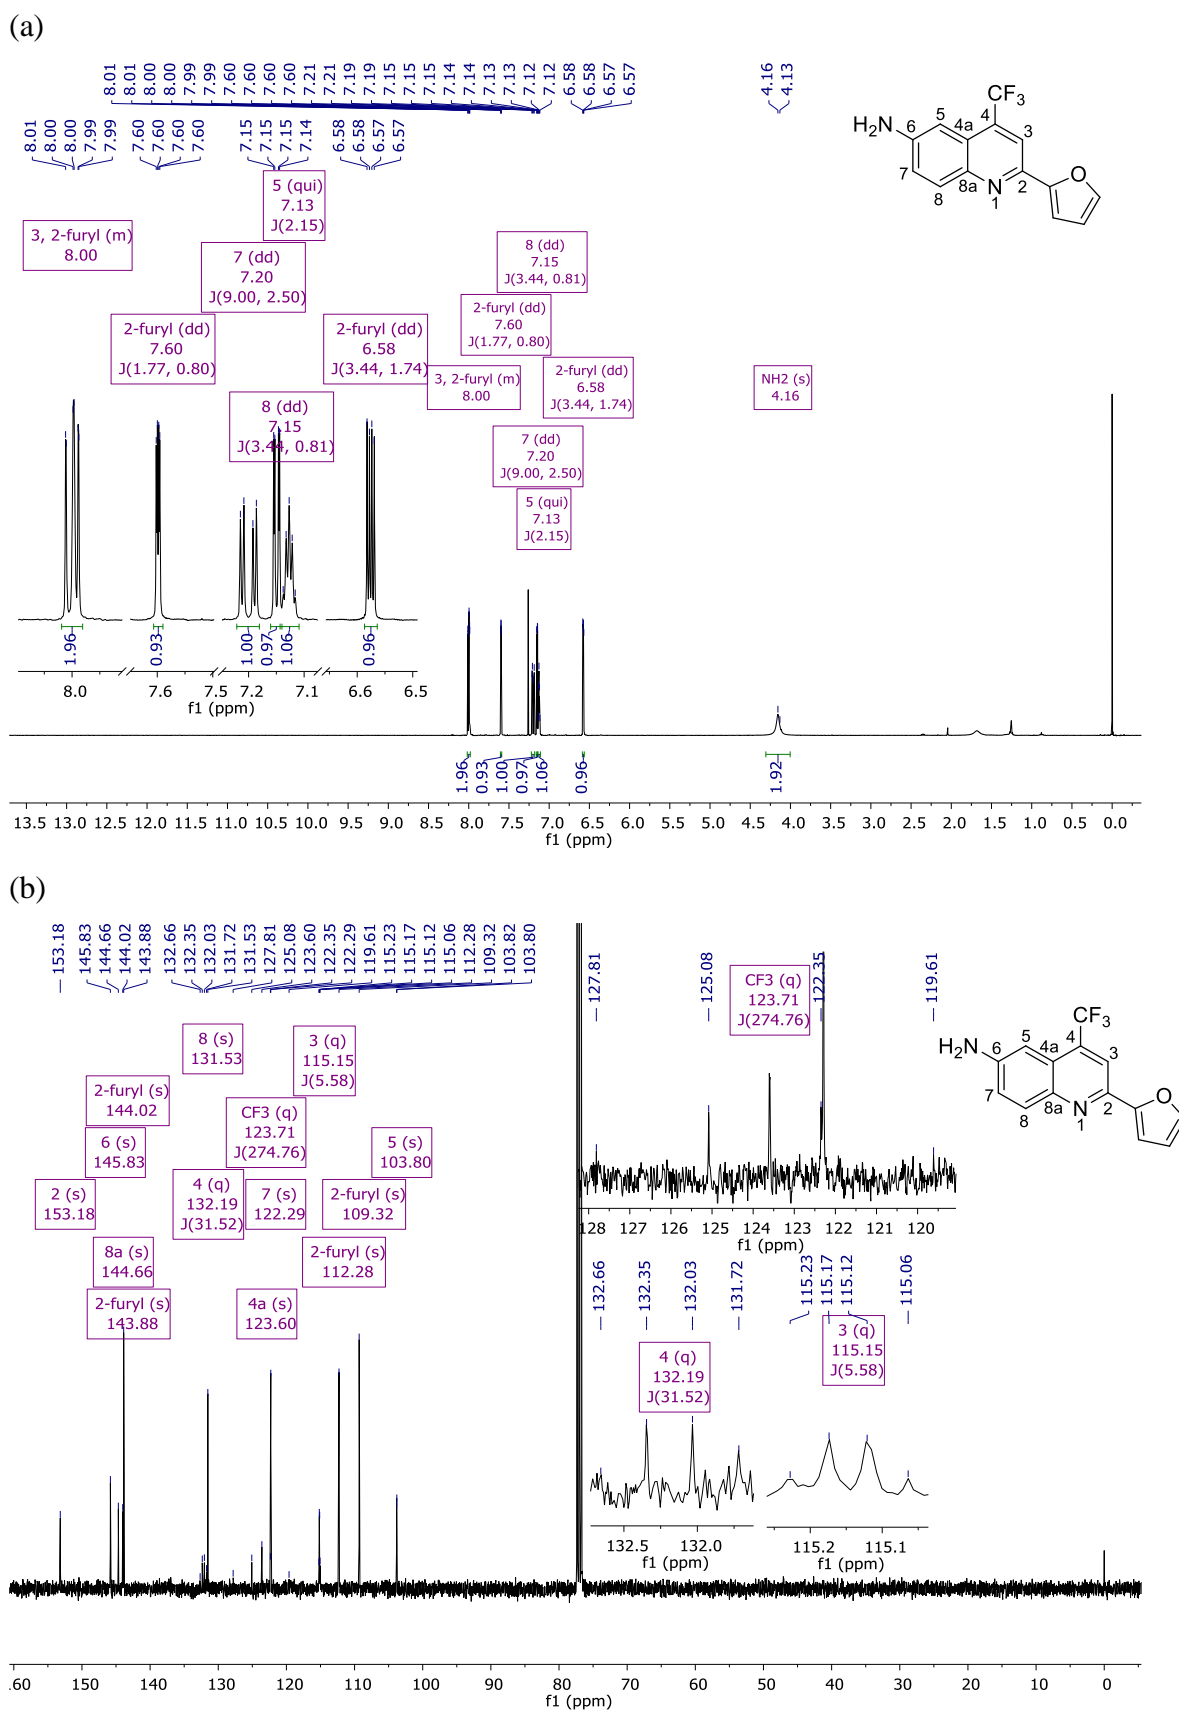



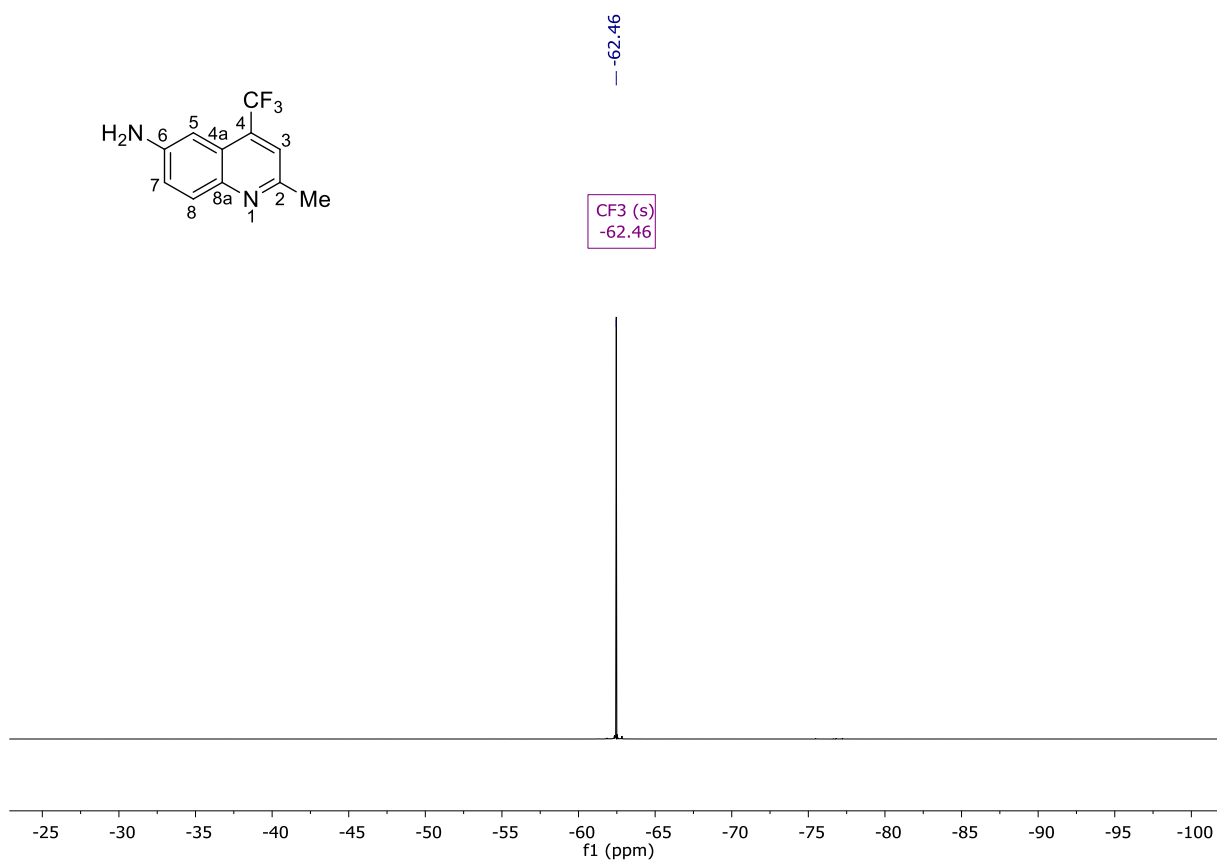

**Figure S42.** <sup>19</sup>F (565 MHz) NMR spectra of **4a** in CDCl<sub>3</sub>

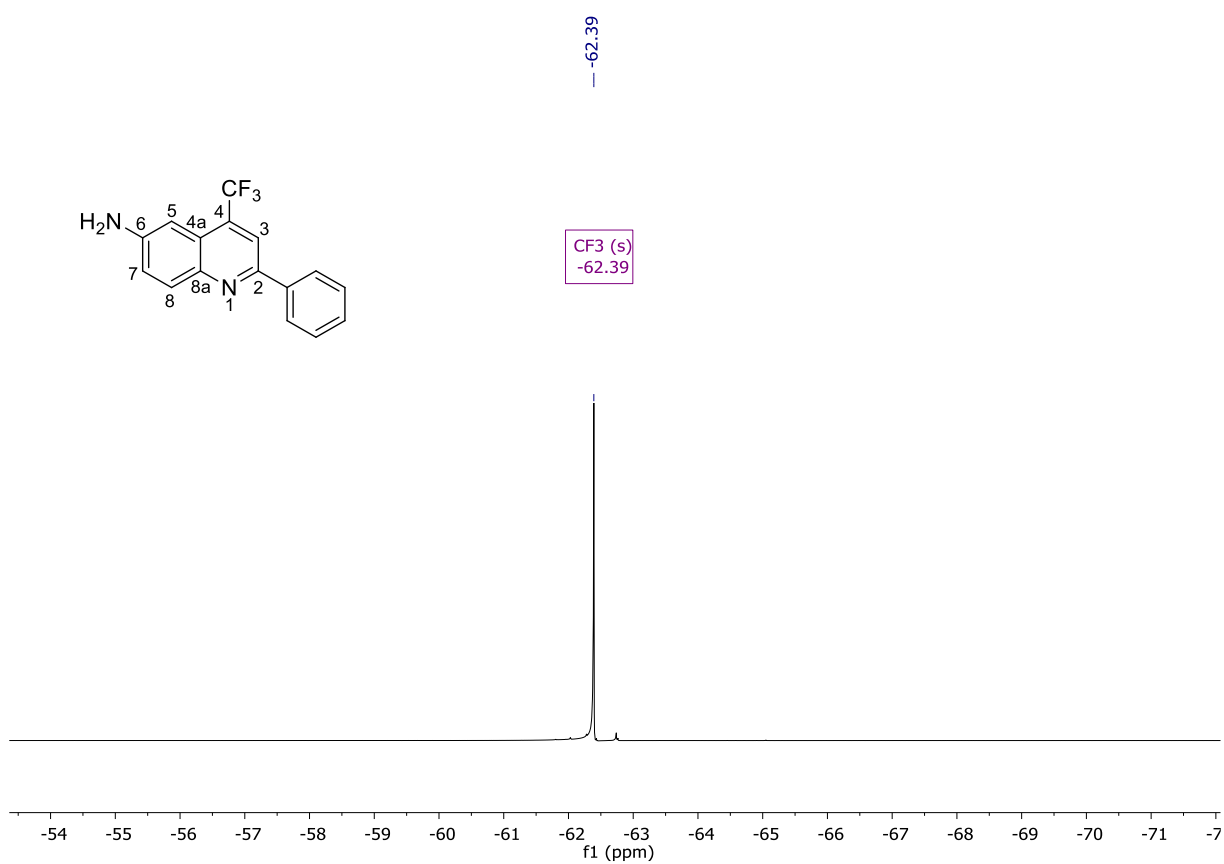

**Figure S43.** <sup>19</sup>F (565 MHz) NMR spectra of **4b** in CDCl<sub>3</sub>.

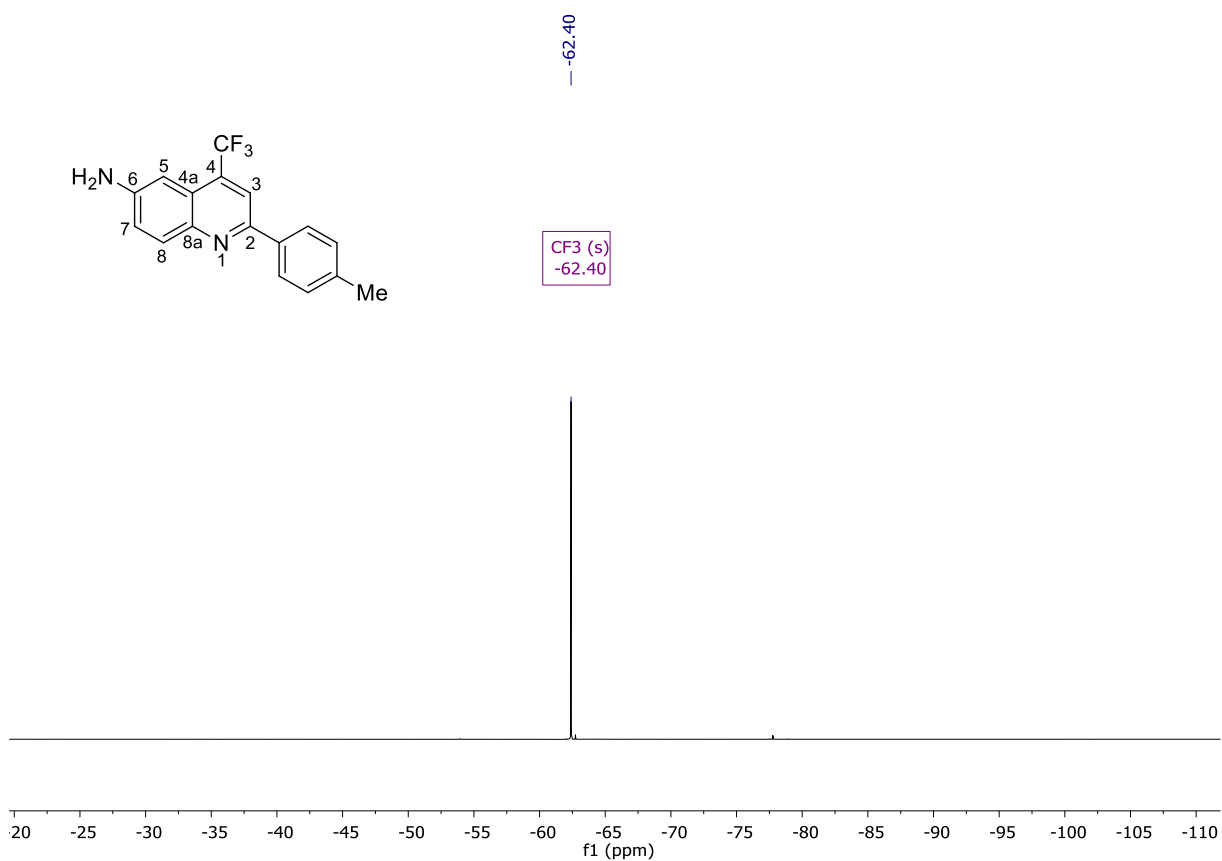

**Figure S44.**  $^{19}\text{F}$  (565 MHz) NMR spectra of **4c** in  $\text{CDCl}_3$ .

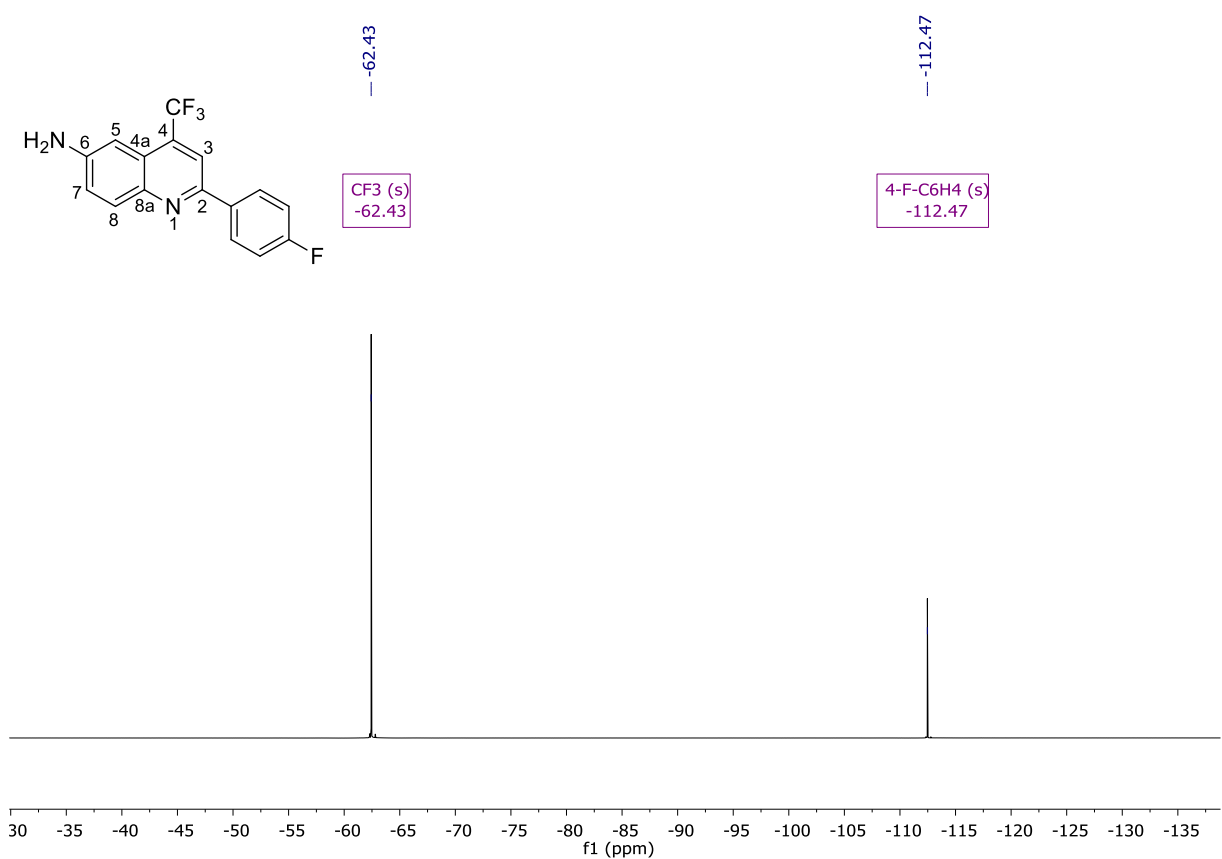

**Figure S45.**  $^{19}\text{F}$  (565 MHz) NMR spectra of **4d** in  $\text{CDCl}_3$ .

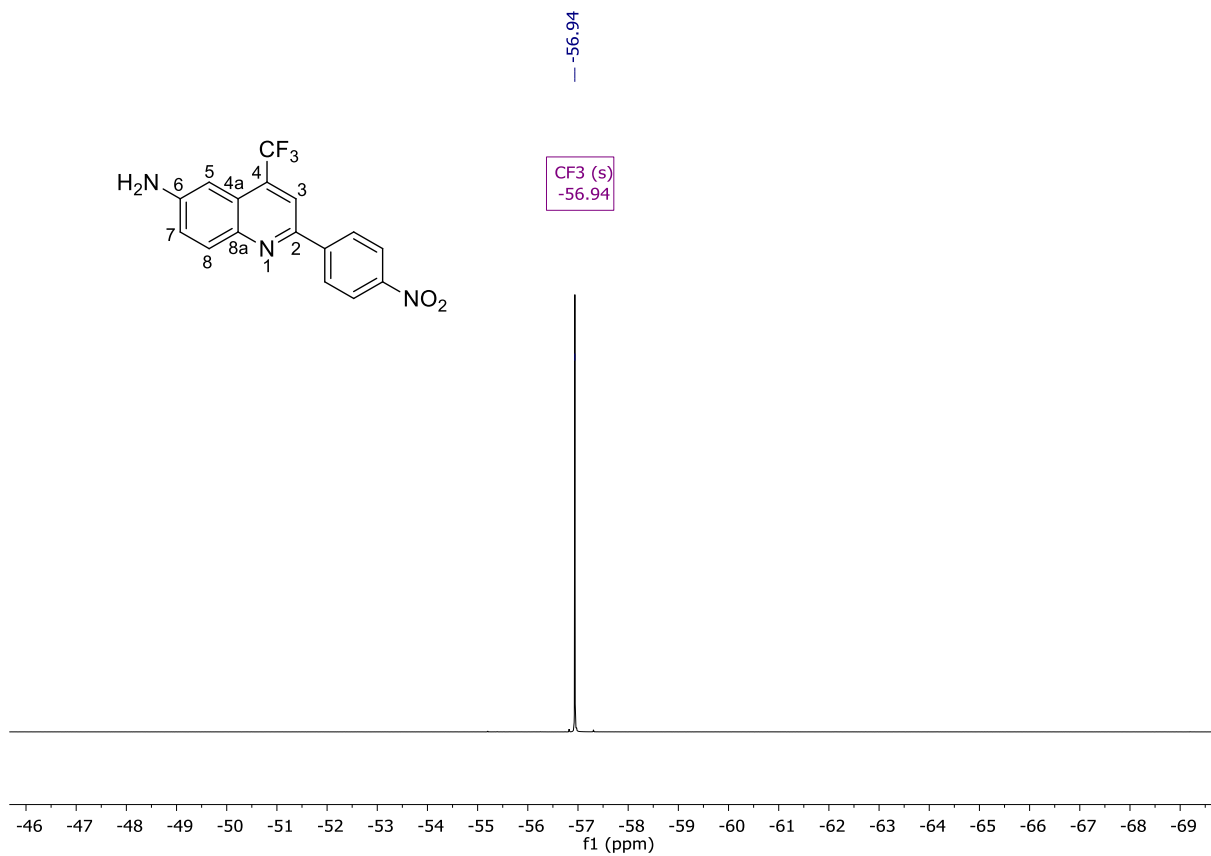

**Figure S46.** <sup>19</sup>F (565 MHz) NMR spectra of **4e** in DMSO-*d*<sub>6</sub>.

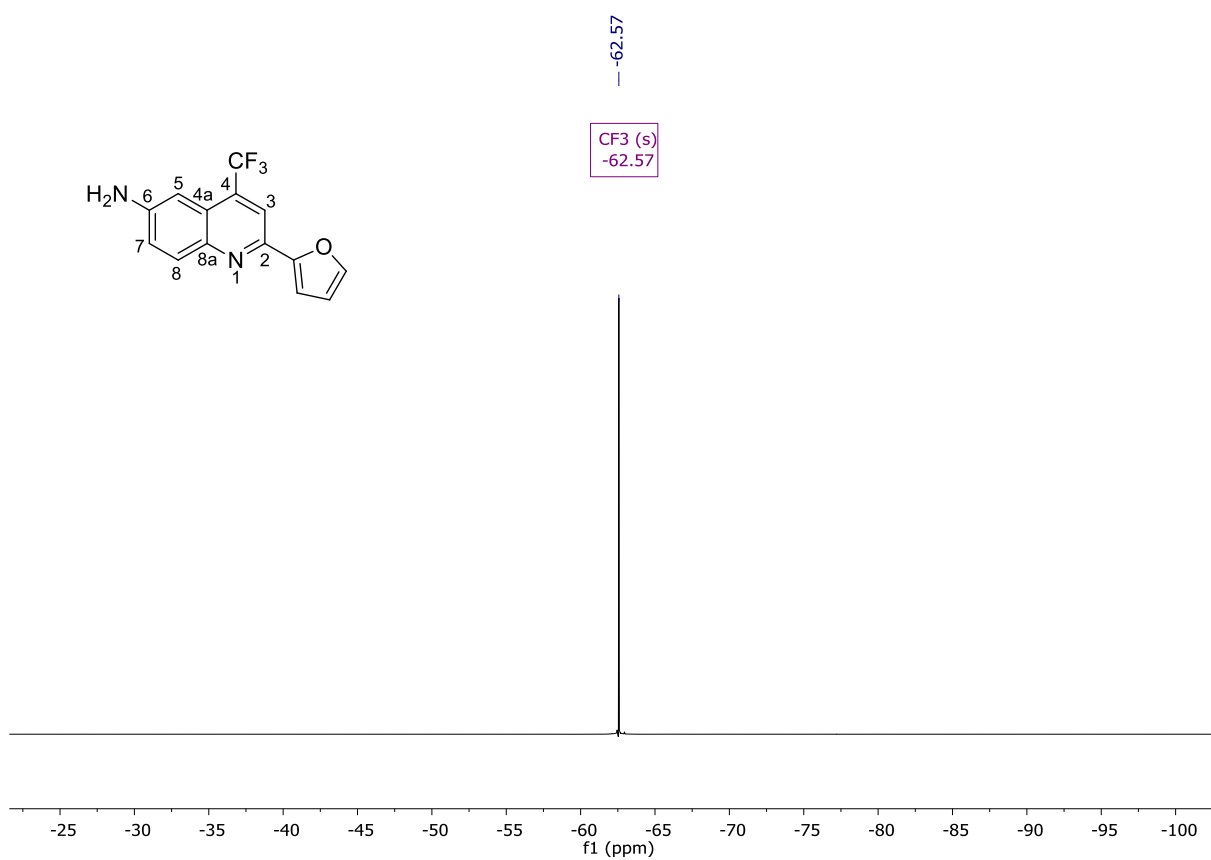

**Figure S47.** <sup>19</sup>F (565 MHz) NMR spectra of **4f** in CDCl<sub>3</sub>.

## 8. HRMS Spectra

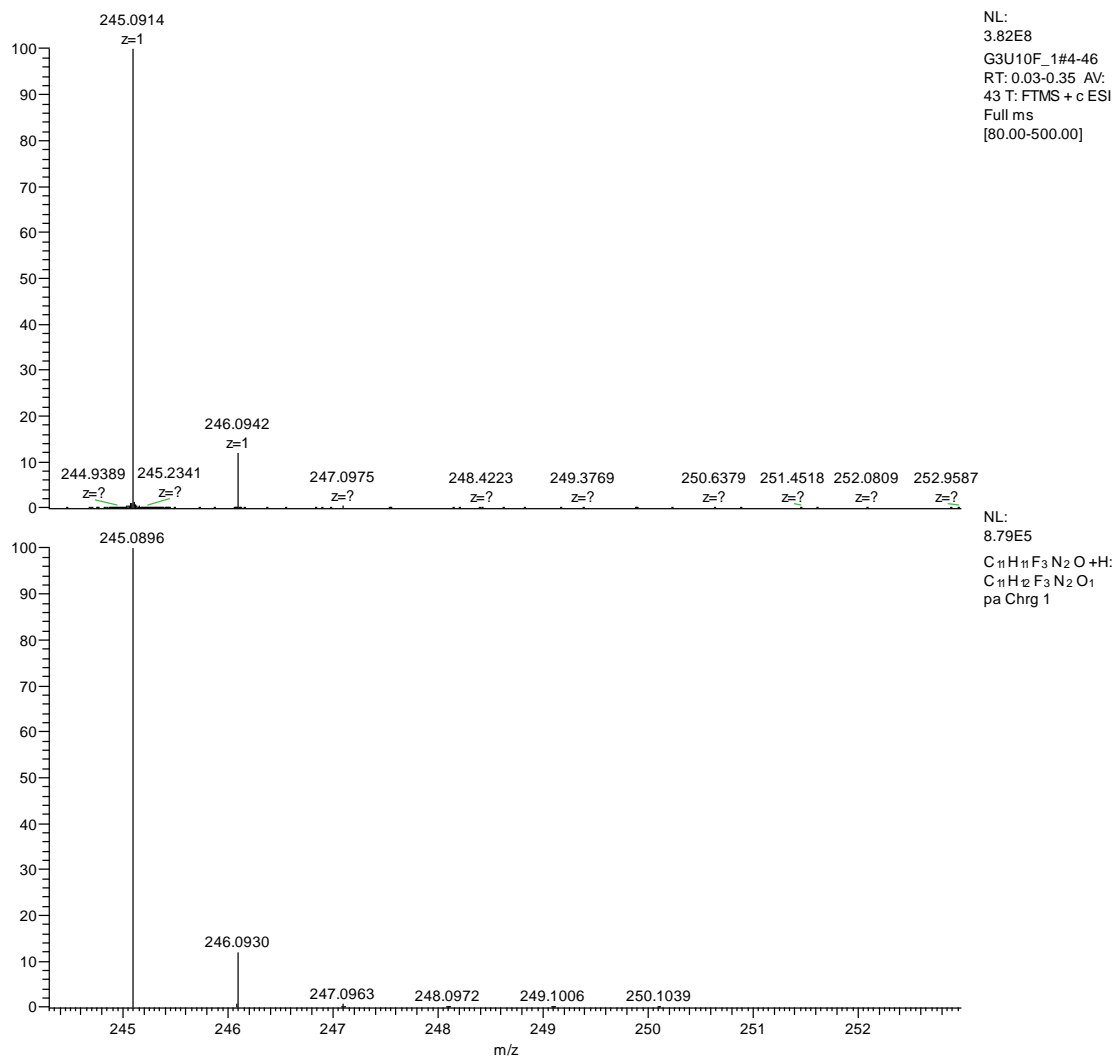Figure S48. HRMS spectrum of **3b** (experimental up, calculated down).

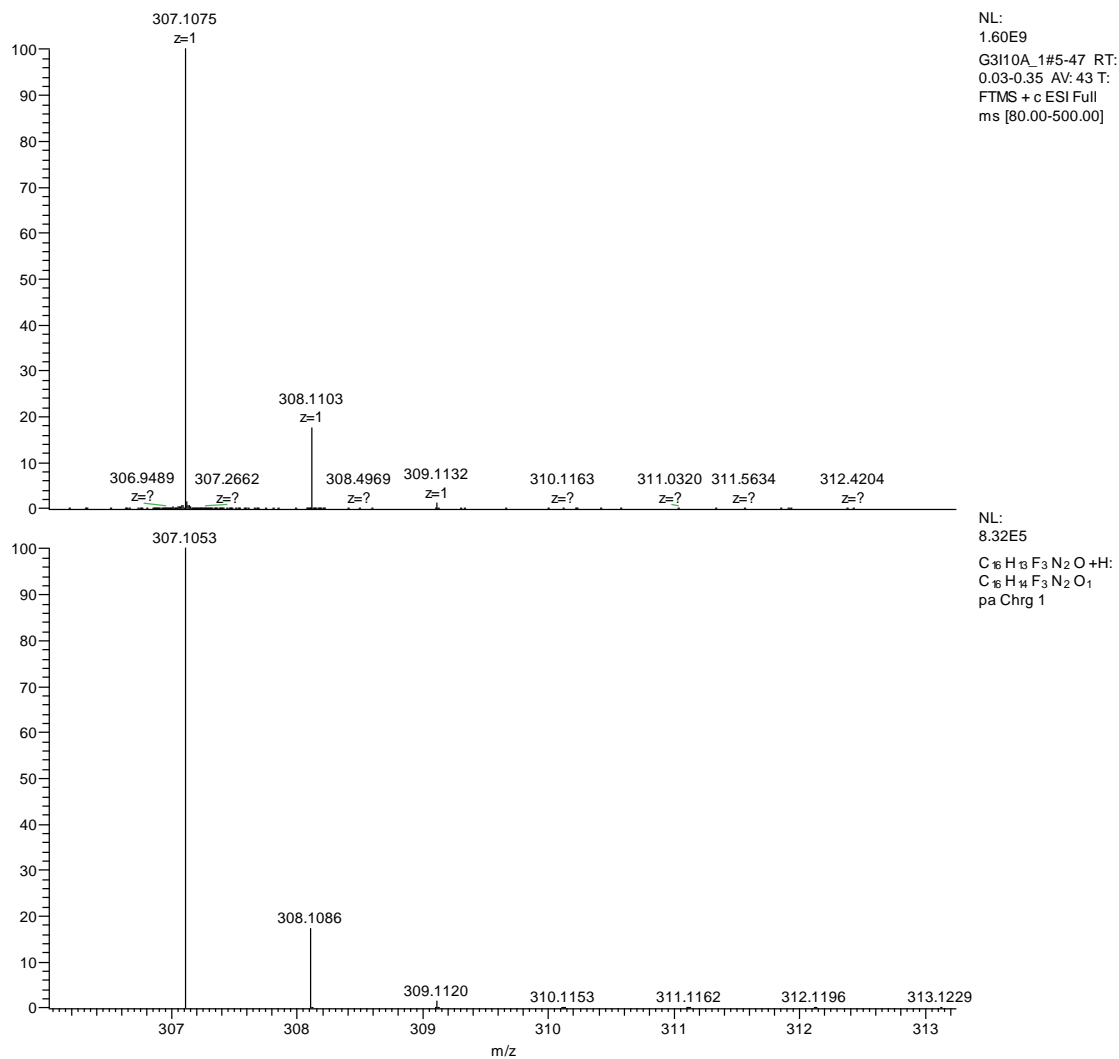

**Figure S49.** HRMS spectrum of **3b** (experimental up, calculated down).

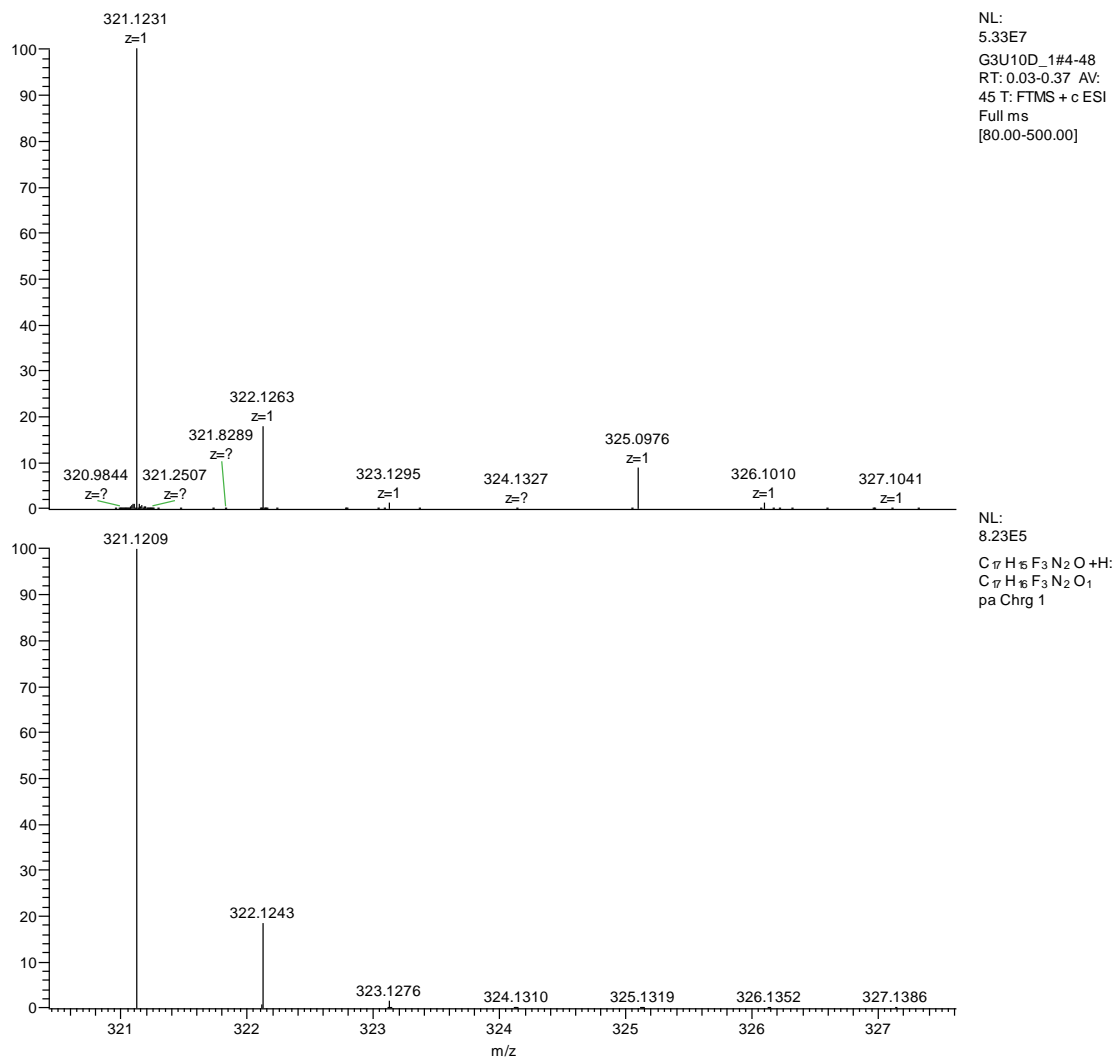

**Figure S50.** HRMS spectrum of **3c** (experimental up, calculated down).

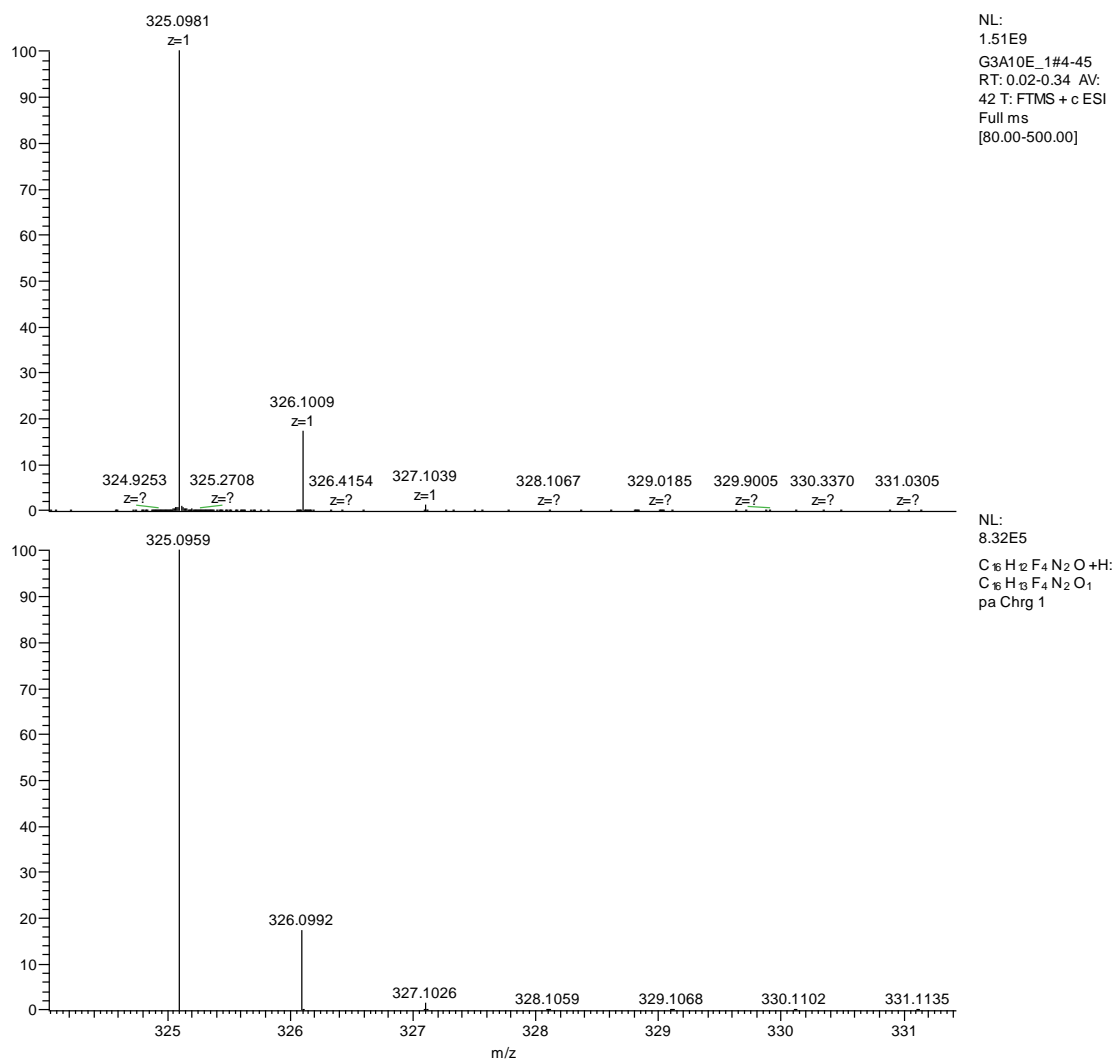

**Figure S51.** HRMS spectrum of **3d** (experimental up, calculated down).

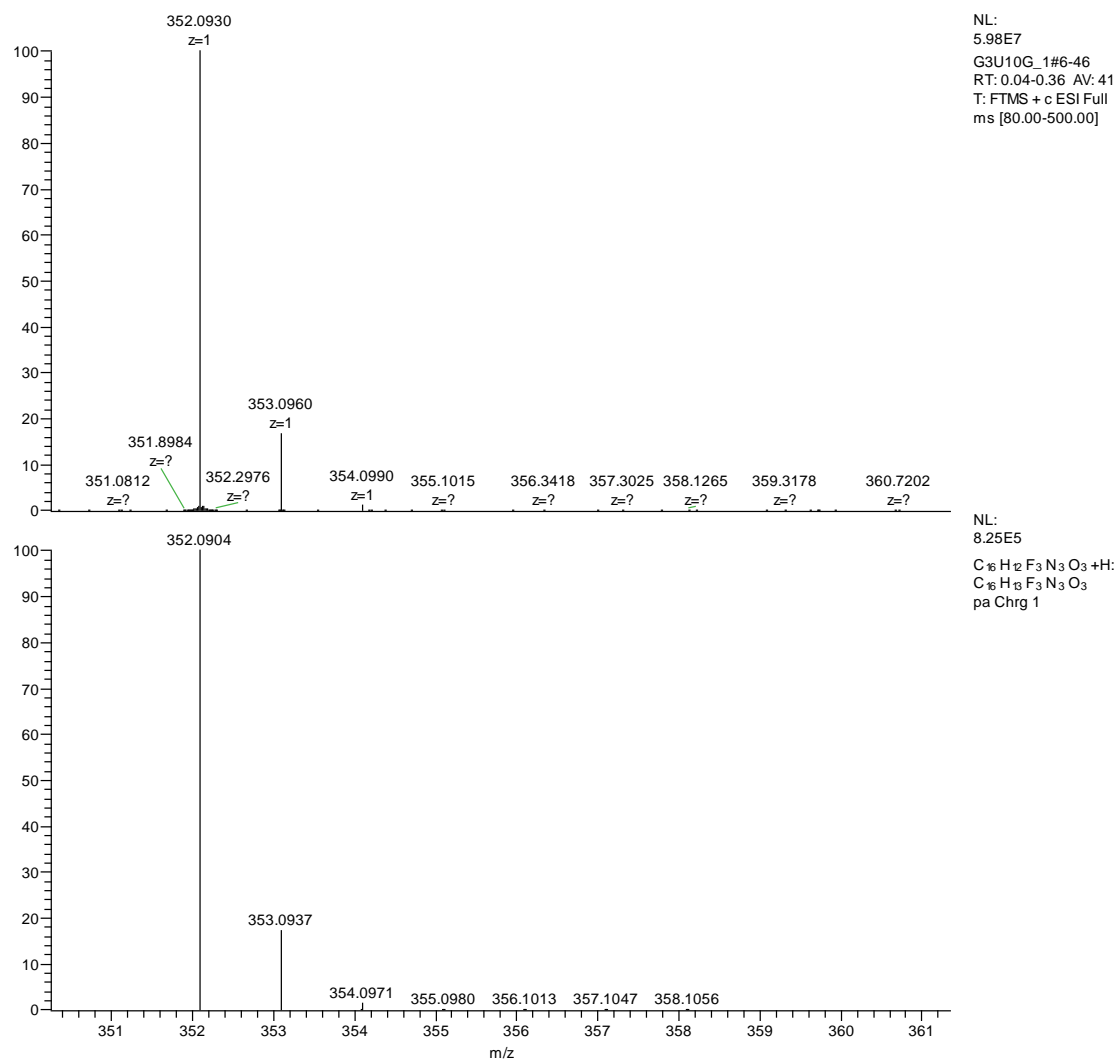

**Figure S52.** HRMS spectrum of **3e** (experimental up, calculated down).



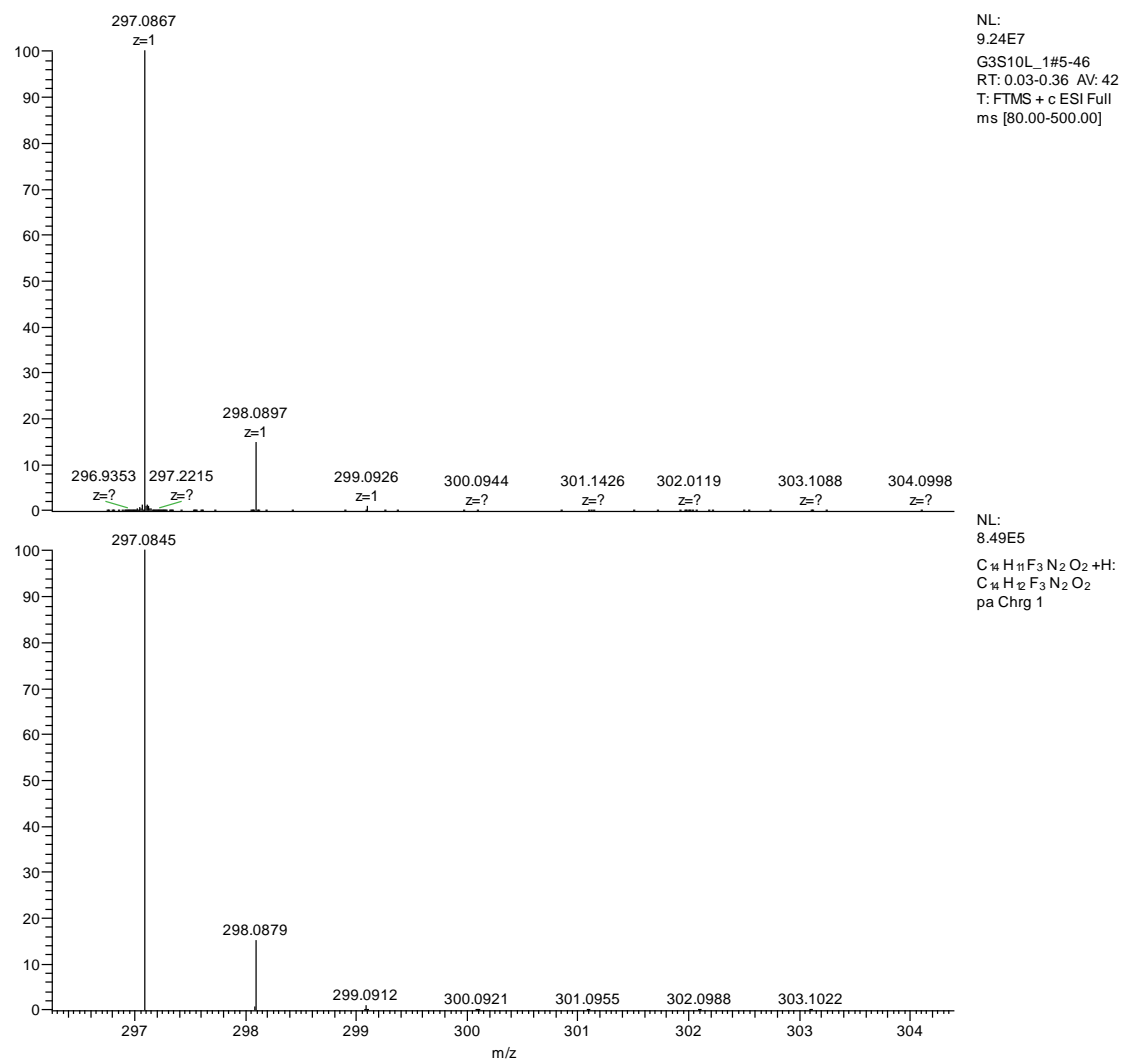

**Figure S53.** HRMS spectrum of **3f** (experimental up, calculated down).

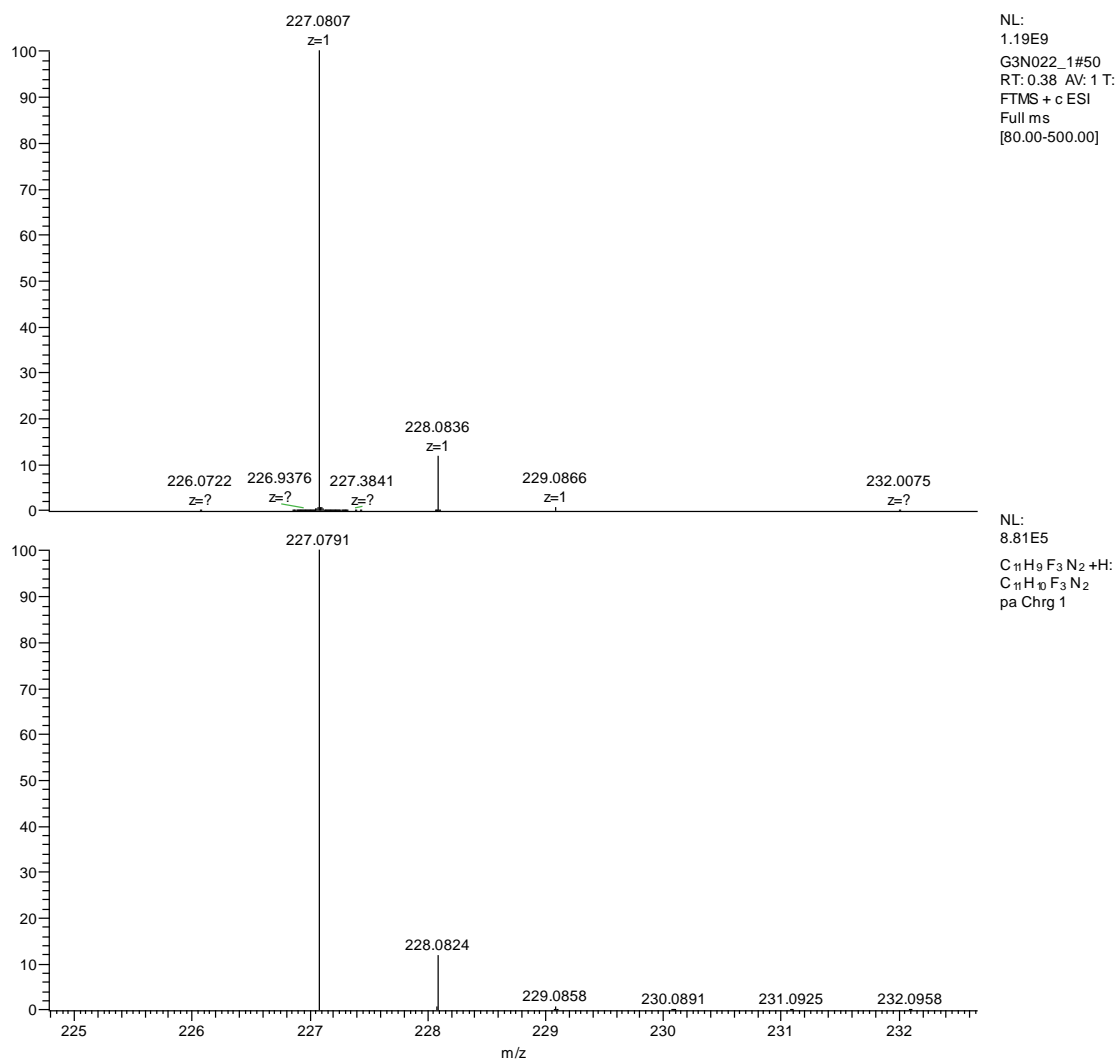

**Figure S54.** HRMS spectrum of **4a** (experimental up, calculated down).

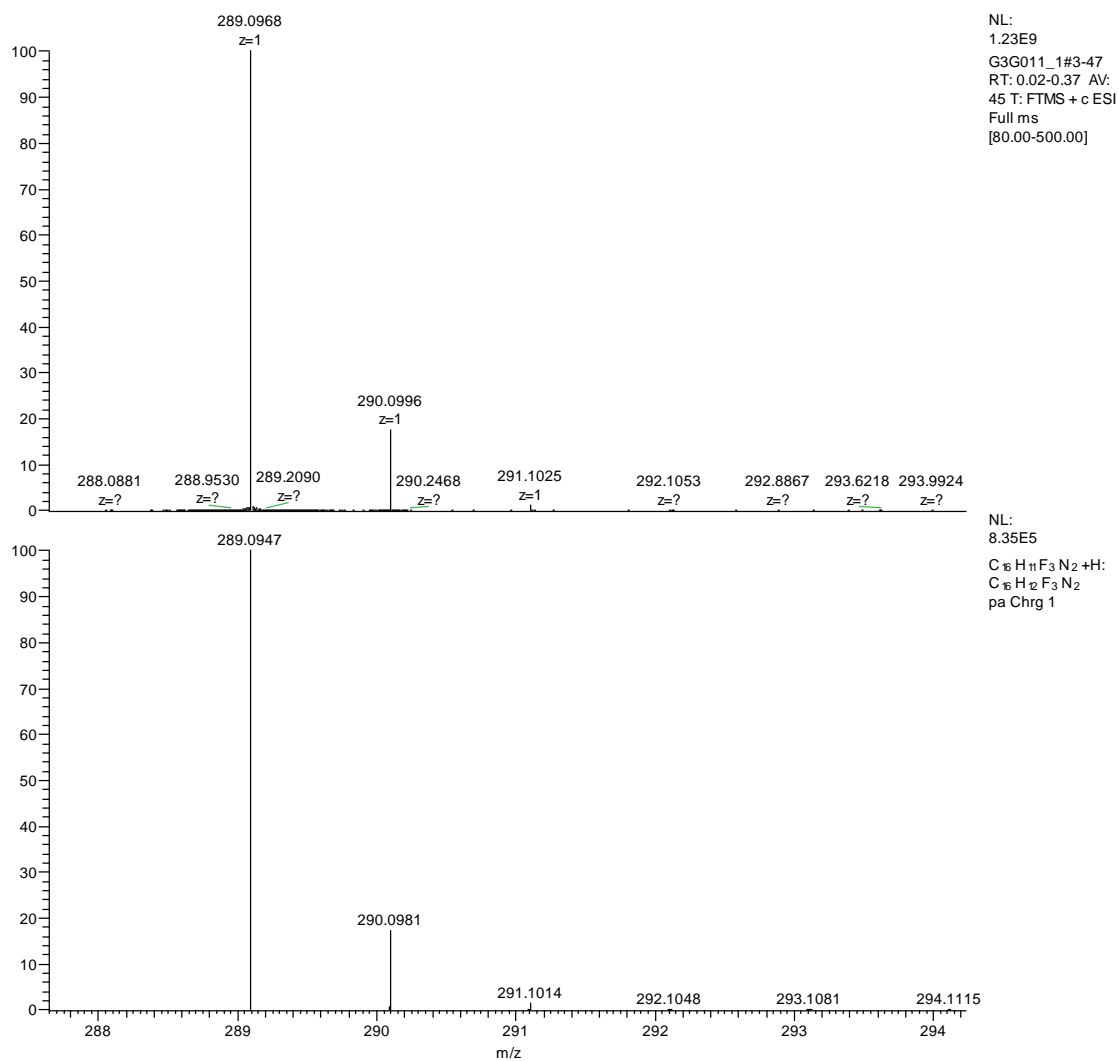

**Figure S55.** HRMS spectrum of **4b** (experimental up, calculated down).

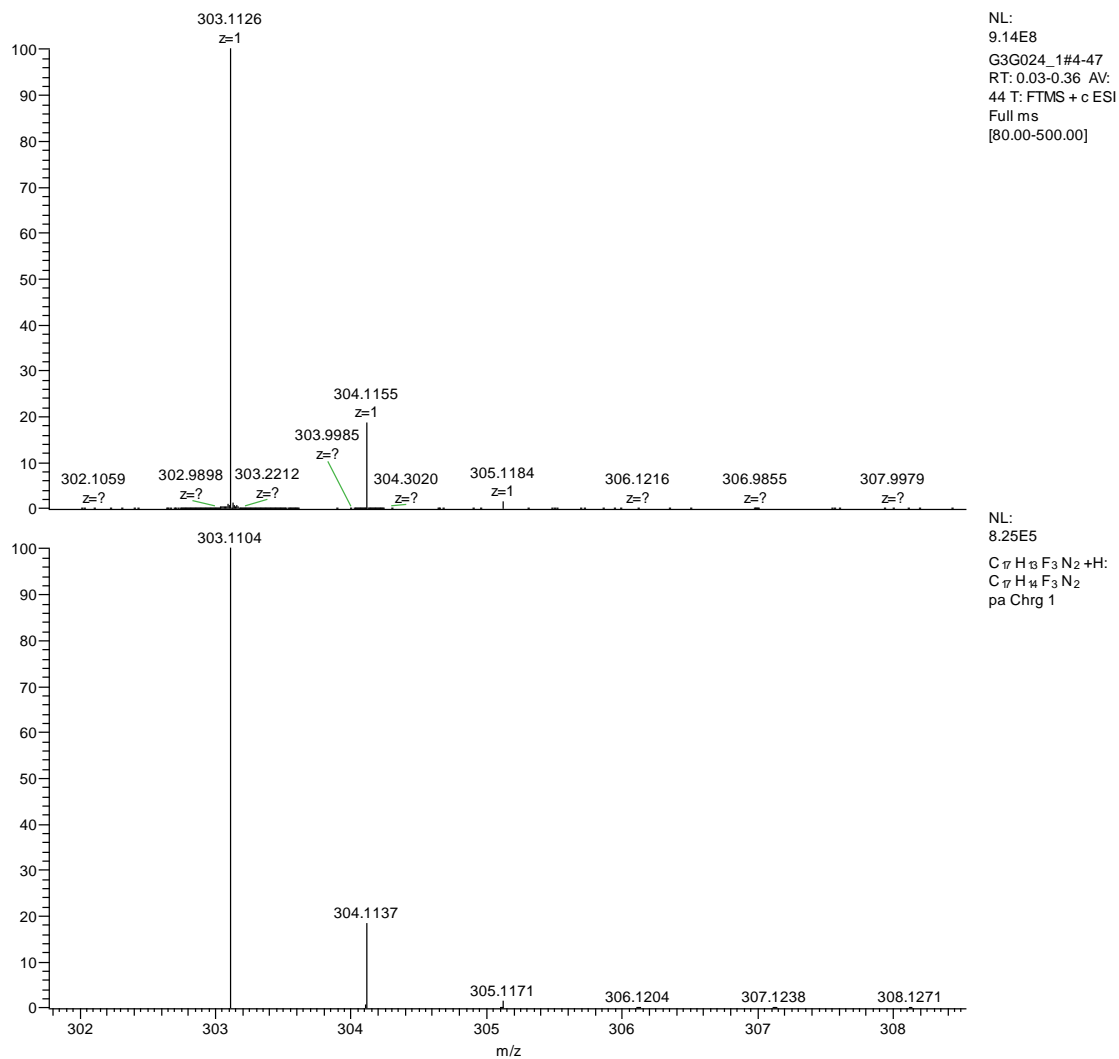

**Figure S56.** HRMS spectrum of **4c** (experimental up, calculated down).

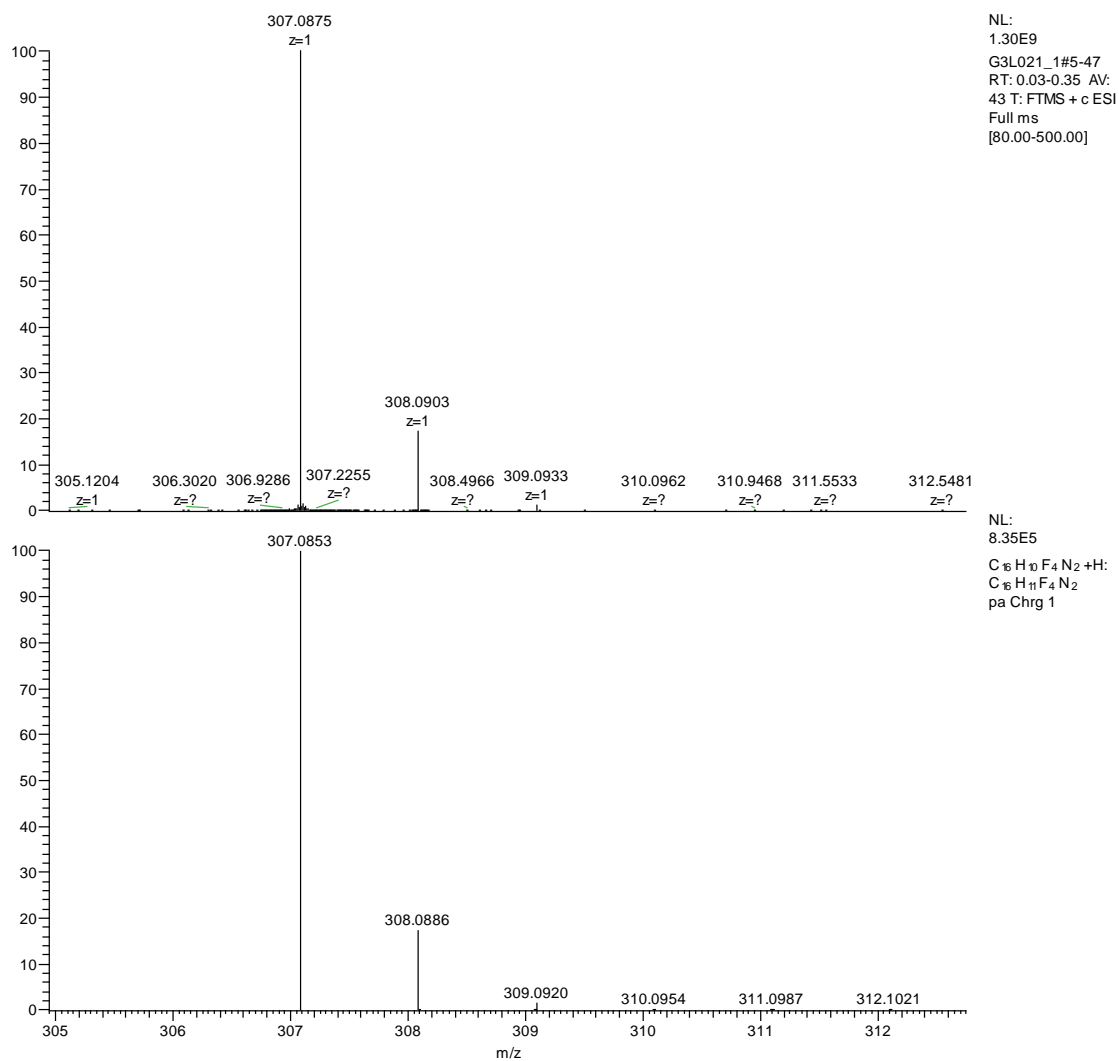

**Figure S57.** HRMS spectrum of **4d** (experimental up, calculated down).

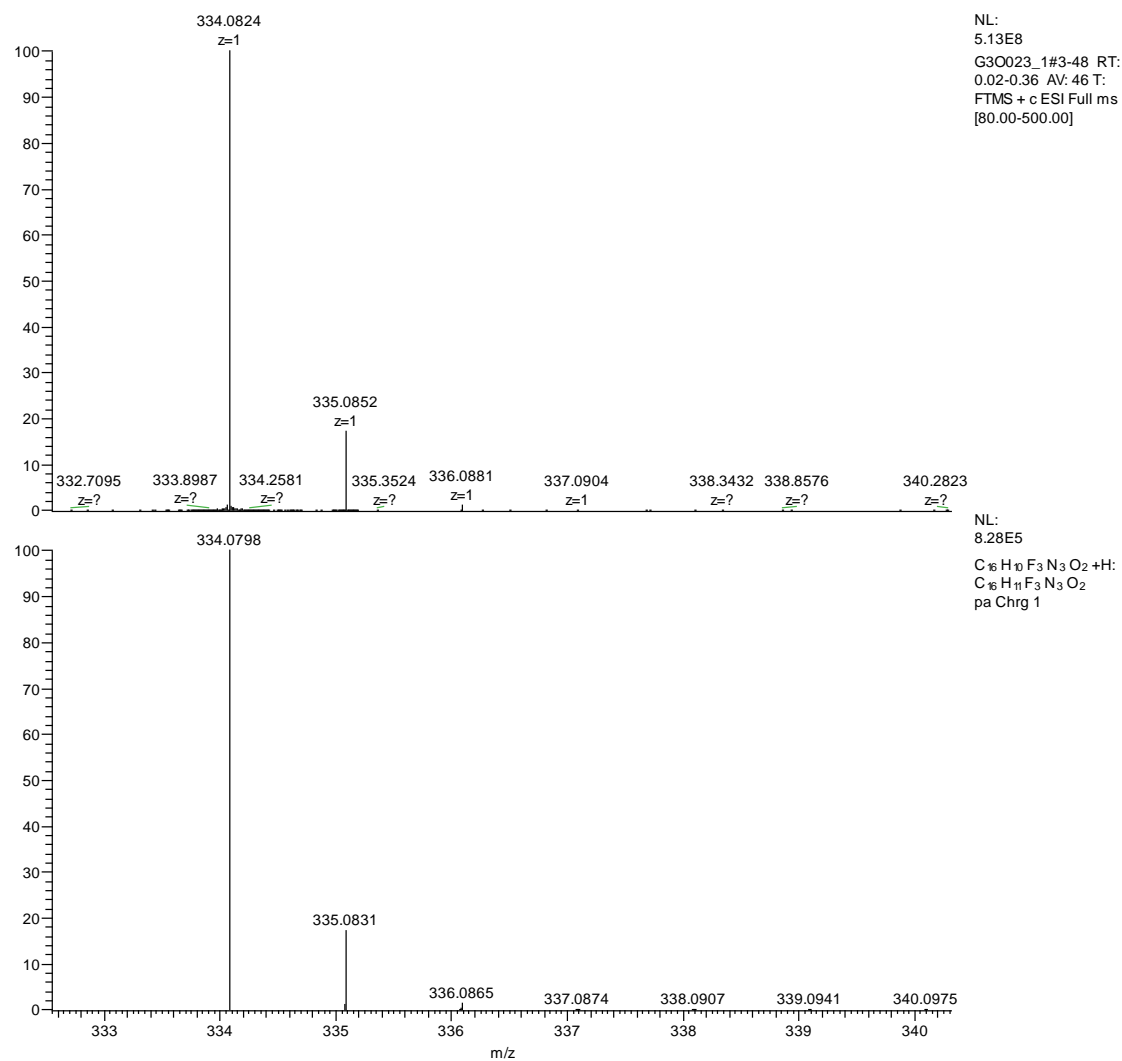

**Figure S58.** HRMS spectrum of **4e** (experimental up, calculated down).

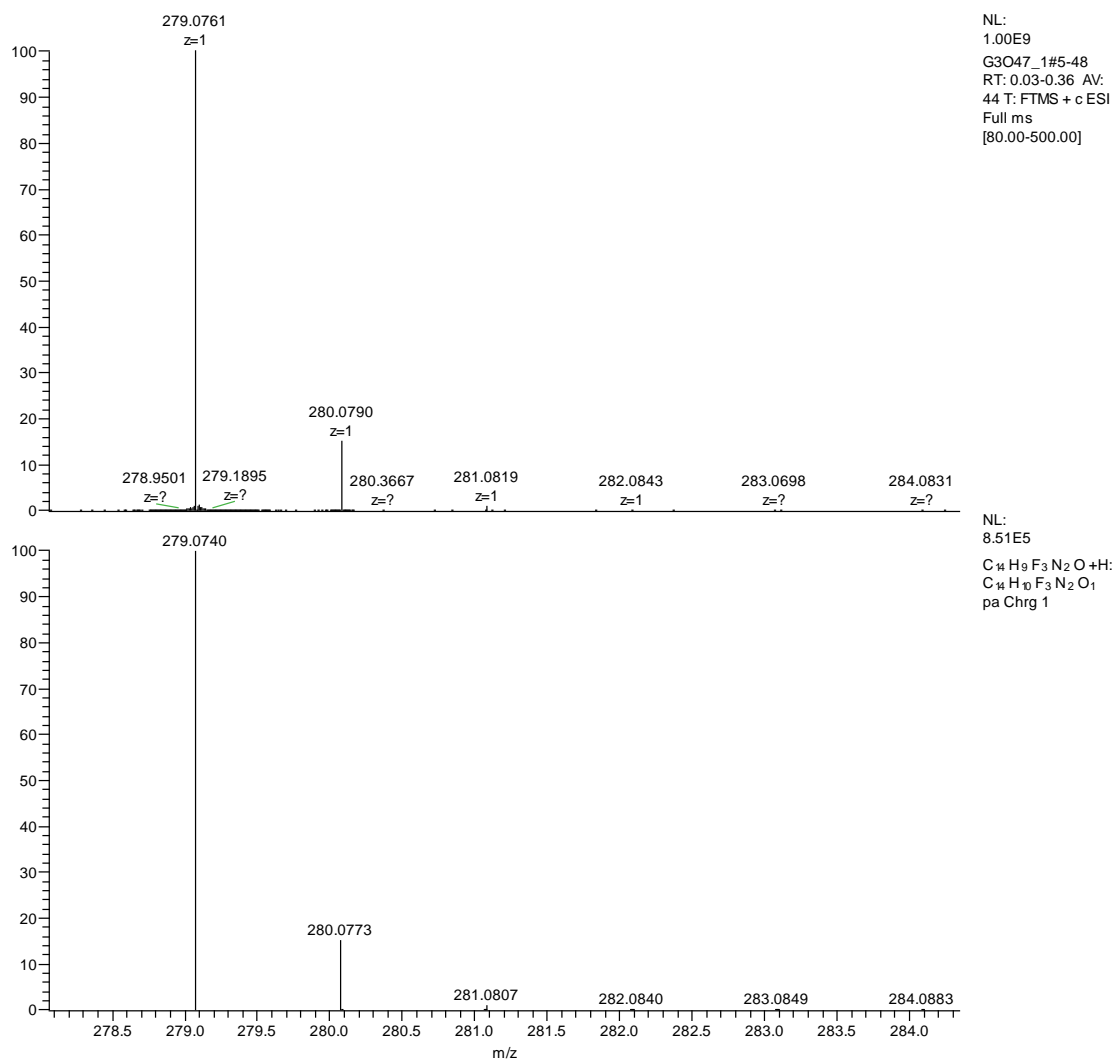

**Figure S59.** HRMS spectrum of **4f** (experimental up, calculated down).
